# Supplementary material for: Photocatalyzed transfer hydrogenation and deuteriation of cyclic N-sulfonylimines
Source: Royal Society of Chemistry journal article supplement (doi:10.1039/c9qo00231f), 2019-01-01

# Photocatalyzed Transfer Hydrogenation and Deuteration of Cyclic *N*-Sulfonylimines

Xuexin Zhang,<sup>a</sup> Jingchao Chen,<sup>\*a</sup> Yang Gao,<sup>a</sup> Kangkui Li,<sup>a</sup> Yongyun Zhou,<sup>a</sup>

Weiqing Sun<sup>a</sup> and Baomin Fan<sup>\*a,b</sup>

<sup>a</sup> YMU-HKBU Joint Laboratory of Traditional Natural Medicine, Yunnan Minzu University, Kunming, 650500, China. E-mail: chenjingchao84@163.com (J.-C. Chen); adams.bmf@hotmail.com (B.-M. Fan)

<sup>b</sup> Key Laboratory of Chemistry in Ethnic Medicinal Resources, Yunnan Minzu University, Kunming, 650500, China

## Table of contents

|                                                      |     |
|------------------------------------------------------|-----|
| Part I General Method.....                           | S2  |
| Part II Procedure for the reactions.....             | S2  |
| Part III Characterization Data of the products ..... | S3  |
| Part IV NMR spectra .....                            | S16 |

## Part I General Method

The reactions and manipulations were performed under an atmosphere of argon by using standard Schlenk techniques and Drybox (Mikrouna, Supper 1220/750). Anhydrous THF (Tetrahydrofuran) and dioxane were distilled from sodium benzophenone ketyl prior to use. Anhydrous CH<sub>3</sub>CN and DCE (Dichloroethane) was distilled from calcium hydride and stored under argon. Cyclic *N*-sulfonylimines **1a-u** were prepared according to the reported references.<sup>[1-4]</sup> <sup>1</sup>H NMR and <sup>13</sup>C NMR spectra were recorded on Bruker-Avance 400 MHz spectrometer. CDCl<sub>3</sub> was used as solvent. Chemical shifts (δ) were reported in ppm with tetramethylsilane as internal standard, and J values were given in Hz. Melting points were measured on X-4 melting point apparatus and uncorrected. High resolution mass spectra (HRMS) were performed on a VG Autospec-3000 spectrometer. Column chromatography was performed with silica gel (200-300 mesh) with petroleum ether and ethyl acetate as eluents.

## Part II Procedure for the reactions

**Typical procedure for the preparation of cyclic *N*-sulfonylimines<sup>[1-3]</sup>.**

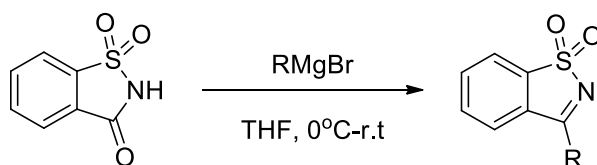

The Grignard reagent was typically prepared using flame-dried magnesium turnings (2.0 equiv) with a few crystals of I<sub>2</sub> in anhydrous THF (10 mL). The aryl halide (1.0 equiv) was added to the solution until initiation of the Grignard reagent, after which the remaining aryl halide was added dropwise at 0 °C. The reaction was stirred 2 h at room temperature, then titrated. The Grignard reagent (2.0 equiv) was then slowly added to a solution of saccharin (1.0 equiv) in THF (6 mL) at 0 °C. The reaction was allowed to warm and stirred at 22 °C overnight. The reaction was quenched with saturated aqueous NH<sub>4</sub>Cl (20 mL) and extracted with EtOAc (3 x 20 mL). The solvent was removed under reduced pressure and the crude product was dissolved in toluene (30 mL), followed by the addition of TsOH (200 mg, 1.2 mmol). The resulting solution was heated to reflux for 2h. The solvent was removed and then a saturated aqueous NH<sub>4</sub>Cl solution (20 mL) was added. The combined organic layers were washed with brine, dried over Na<sub>2</sub>SO<sub>4</sub>, filtered, and concentrated in vacuum. The product was purified by recrystallization from hot absolute ethanol and chloroform or by flash column chromatography using silica gel to obtain the corresponding *N*-sulfonylimines. Compounds **1a-t** were prepared in similar methods.

**Typical procedure for the preparation of *N*-sulfonylimine **1u**<sup>[4]</sup>:**

A 50 mL Schlenk flask containing CH<sub>2</sub>Cl<sub>2</sub> (30 mL) was charged with benzenesulfinamide (314 mg, 2.0 mmol), acetophenone (1.2 mL, 10 mmol) and Ti(OEt)<sub>4</sub> (1.7 mL, 8.0 mmol). The resulting solution was refluxed and monitored by TLC until complete consumption of benzenesulfinamide. Then, CH<sub>3</sub>OH (6 mL) and a few drops of NaHCO<sub>3</sub> were added. The solution was filtered through anhydrous Na<sub>2</sub>SO<sub>4</sub> and washed with EtOAc. The solvent was removed under reduced pressure and the crude product was dissolved in CH<sub>2</sub>Cl<sub>2</sub> (10 mL) followed by the addition of *m*-CPBA (0.7 mg, 3.0 mmol). After the completion of the reaction, the solution was washed with saturated solution of NaHCO<sub>3</sub> and dried over anhydrous Na<sub>2</sub>SO<sub>4</sub>. The solvent was removed under reduced pressure and the crude product was purified by column chromatography using hexanes and EtOAc (10:1) to obtain the corresponding *N*-sulfonylimine **1u** in 66% yield.

**Typical procedure for the transfer hydrogenation of cyclic *N*-sulfonylimines:**

*N*-Sulfonylimines **1a** (24.3 mg, 0.1 mmol), catalyst Ir(ppy)<sub>3</sub> (1.3 mg, 0.02 mmol), PhSSPh (8.7 mg, 0.04 mmol) and 2.0 mL THF were added to a Schlenk tube under argon atmosphere, and then DIEDA (8.7 μL, 0.05 mmol) and H<sub>2</sub>O (180 μL, 10mmol) was injected using a micro-syringe. The mixture was placed under a 30 W blue LED light source and stirred at room temperature. Upon completion of the reaction, the reaction mixture was concentrated, and the residue was purified by chromatography on a silica gel column to afford the desired product **2a** (24.3 mg, 99% yield).

**Part III Characterization Data of the products****3-phenyl-2,3-dihydrobenzo[*d*]isothiazole 1,1-dioxide (**2a**)<sup>[2]</sup>**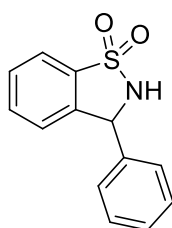

White solid, 99% yield, Mp 128-131 °C. <sup>1</sup>H NMR (400 MHz, CDCl<sub>3</sub>) δ 7.84 (dd, *J* = 5.8, 3.0 Hz, 1H), 7.63 – 7.52 (m, 2H), 7.40 (s, 5H), 7.16 (dd, *J* = 5.3, 2.9 Hz, 1H), 5.74 (d, *J* = 4.1 Hz, 1H), 5.14 (d, *J* = 3.2 Hz, 1H). <sup>13</sup>C NMR (101 MHz, CDCl<sub>3</sub>) δ 139.8, 138.7, 134.7, 133.4, 129.5, 129.3, 129.1, 127.6, 125.4, 121.2, 61.4.

**3-(*p*-tolyl)-2,3-dihydrobenzo[*d*]isothiazole 1,1-dioxide (**2b**)<sup>[2]</sup>**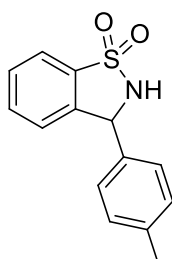

White solid, 98% yield, Mp 168-170 °C. <sup>1</sup>H NMR (400 MHz, CDCl<sub>3</sub>) δ 7.84 (dd, *J* = 5.7, 3.0 Hz, 1H), 7.60 – 7.52 (m, 2H), 7.30 – 7.24 (m, 2H), 7.21 (d, *J* = 8.0 Hz, 2H), 7.15 (dd, *J* = 5.4, 2.9 Hz, 1H), 5.71 (d, *J* = 3.6 Hz, 1H), 5.01 (s, 1H), 2.37 (s, 3H). <sup>13</sup>C NMR (101 MHz, CDCl<sub>3</sub>) δ 140.1, 139.1, 135.8, 134.8, 133.4, 129.9, 129.4, 127.6, 125.4, 121.1, 61.2, 21.2.

### 3-(4-ethylphenyl)-2,3-dihydrobenzo[*d*]isothiazole 1,1-dioxide (2c)

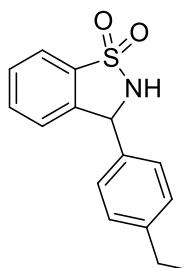

White solid, 89% yield, Mp 120-123 °C. <sup>1</sup>H NMR (400 MHz, CDCl<sub>3</sub>) δ 7.75 (d, *J* = 7.1 Hz, 1H), 7.55 – 7.40 (m, 2H), 7.19 (d, *J* = 7.1 Hz, 2H), 7.14 (d, *J* = 7.7 Hz, 2H), 7.07 (d, *J* = 6.6 Hz, 1H), 5.62 (d, *J* = 3.7 Hz, 1H), 4.91 (d, *J* = 2.3 Hz, 1H), 2.57 (q, *J* = 7.5 Hz, 2H), 1.15 (t, *J* = 7.6 Hz, 3H). <sup>13</sup>C NMR (101 MHz, CDCl<sub>3</sub>) δ 145.4, 140.1, 135.9, 134.9, 133.3, 129.4, 128.8, 127.6, 125.4, 121.1, 61.3, 28.6, 15.4. HRMS calcd for C<sub>15</sub>H<sub>15</sub>NO<sub>2</sub>S [M]<sup>+</sup> : 273.0824. Found: 273.0827.

### 3-(4-(*tert*-butyl)phenyl)-2,3-dihydrobenzo[*d*]isothiazole

#### 1,1-dioxide(2d)

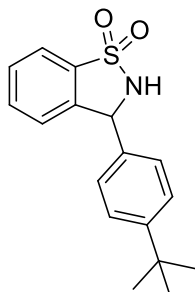

White solid, 98% yield, Mp 128-130 °C. <sup>1</sup>H NMR (400 MHz, CDCl<sub>3</sub>) δ 7.84 – 7.80 (m, 1H), 7.58 – 7.50 (m, 2H), 7.39 (d, *J* = 8.2 Hz, 2H), 7.30 – 7.24 (m, 2H), 7.16 (d, *J* = 7.0 Hz, 1H), 5.70 (d, *J* = 3.9 Hz, 1H), 5.04 (d, *J* = 3.6 Hz, 1H), 1.30 (s, 9H). <sup>13</sup>C NMR (101 MHz, CDCl<sub>3</sub>) δ 152.3, 140.1, 135.6, 134.9, 133.3, 129.4, 127.4, 126.2, 125.5, 121.1, 61.2, 34.7, 31.3. HRMS calcd for C<sub>17</sub>H<sub>19</sub>NO<sub>2</sub>S [M]<sup>+</sup> : 301.1137. Found: 301.1140.

### 3-(*m*-tolyl)-2,3-dihydrobenzo[*d*]isothiazole 1,1-dioxide [2]

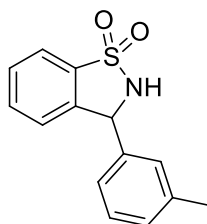

White solid, 98% yield, Mp 155-158 °C.  $^1\text{H}$  NMR (400 MHz,  $\text{CDCl}_3$ )  $\delta$  7.83 (d,  $J = 7.2$  Hz, 1H), 7.59 – 7.49 (m, 2H), 7.27 (dd,  $J = 9.7, 5.6$  Hz, 1H), 7.16 (t,  $J = 9.9$  Hz, 4H), 5.68 (d,  $J = 3.7$  Hz, 1H), 5.05 (d,  $J = 2.1$  Hz, 1H), 2.34 (s, 3H).  $^{13}\text{C}$  NMR (101 MHz,  $\text{CDCl}_3$ )  $\delta$  138.9, 138.2, 137.5, 133.7, 132.3, 128.9, 128.4, 128.1, 127.1, 124.4, 123.7, 120.1, 60.4, 20.37.

### 3-(*o*-tolyl)-2,3-dihydrobenzo[*d*]isothiazole 1,1-dioxide (2f) <sup>[2]</sup>

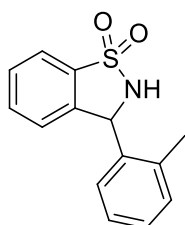

White solid, 98% yield, Mp 67-69 °C.  $^1\text{H}$  NMR (400 MHz,  $\text{CDCl}_3$ )  $\delta$  7.91 – 7.83 (m, 1H), 7.65 – 7.54 (m, 2H), 7.30 – 7.27 (m, 2H), 7.23 – 7.18 (m, 1H), 7.17 – 7.12 (m, 2H), 6.03 (d,  $J = 4.5$  Hz, 1H), 4.86 (d,  $J = 4.1$  Hz, 1H), 2.48 (s, 3H).  $^{13}\text{C}$  NMR (101 MHz,  $\text{CDCl}_3$ )  $\delta$  140.1, 136.8, 136.2, 135.7, 133.3, 131.3, 129.5, 129.1, 128.1, 127.1, 125.2, 121.3, 58.3, 19.4.

### 3-(4-methoxyphenyl)-2,3-dihydrobenzo[*d*]isothiazole 1,1-dioxide

(2g) <sup>[2]</sup>

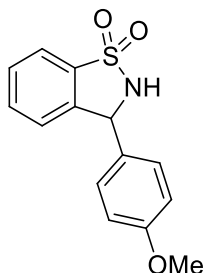

White solid, 98% yield, Mp 150-153 °C.  $^1\text{H}$  NMR (400 MHz,  $\text{CDCl}_3$ )  $\delta$  7.91 – 7.76 (m, 1H), 7.65 – 7.47 (m, 2H), 7.30 – 7.19 (m, 2H), 7.13 (d,  $J = 6.7$  Hz, 1H), 6.89 (d,  $J = 8.6$  Hz, 2H), 5.68 (d,  $J = 3.9$  Hz, 1H), 5.00 (d,  $J = 3.5$  Hz, 1H), 3.80 (s, 3H).  $^{13}\text{C}$  NMR (101 MHz,  $\text{CDCl}_3$ )  $\delta$  160.2, 140.3, 135.0, 133.3, 130.6, 129.4, 129.0, 125.4, 121.1, 114.6, 61.0, 55.4.

### 3-(2-methoxyphenyl)-2,3-dihydrobenzo[*d*]isothiazole 1,1-dioxide

(2h) <sup>[6]</sup>

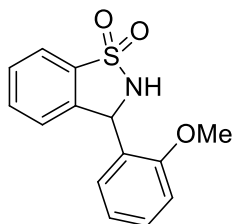

White solid, 93% yield, Mp 168-170 °C.  $^1\text{H}$  NMR (400 MHz,  $\text{CDCl}_3$ )  $\delta$  7.82 (dd,  $J = 6.5, 2.1$  Hz, 1H), 7.53 (m, 2H), 7.34 (m, 1H), 7.25 (ddd,  $J = 8.3, 7.0, 2.2$  Hz, 2H), 6.99 – 6.92 (m, 2H),

6.15 (d,  $J = 5.0$  Hz, 1H), 5.14 (d,  $J = 4.7$  Hz, 1H), 3.85 (s, 3H).  $^{13}\text{C}$  NMR (101 MHz,  $\text{CDCl}_3$ )  $\delta$  157.0, 140.4, 135.3, 133.1, 130.2, 129.2, 128.7, 126.4, 125.2, 121.3, 121.1, 111.1, 56.4, 55.6 .

### 3-(3-methoxyphenyl)-2,3-dihydrobenzo[*d*]isothiazole 1,1-dioxide (2i)

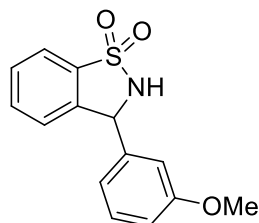

White solid, 94% yield, Mp 133-135 °C.  $^1\text{H}$  NMR (400 MHz,  $\text{CDCl}_3$ )  $\delta$  7.87 – 7.78 (m, 1H), 7.62 – 7.49 (m, 2H), 7.33 – 7.25 (m, 1H), 7.18 (t,  $J = 6.3$  Hz, 1H), 6.96 (d,  $J = 7.5$  Hz, 1H), 6.93 – 6.86 (m, 2H), 5.69 (d,  $J = 3.9$  Hz, 1H), 5.10 (d,  $J = 3.0$  Hz, 1H), 3.78 (s, 3H).  $^{13}\text{C}$  NMR (101 MHz,  $\text{CDCl}_3$ )  $\delta$  160.3 , 140.2, 139.7, 134.7, 133.4, 130.3, 129.5, 125.4, 121.2, 119.7, 114.6, 112.9, 61.3, 55.4. HRMS calcd for  $\text{C}_{14}\text{H}_{13}\text{NO}_3\text{S}$   $[\text{M}]^+$  : 275.0616. Found: 275.0609.

### 3-(3,4,5-trimethoxyphenyl)-2,3-dihydrobenzo[*d*]isothiazole

#### 1,1-dioxide (2j)<sup>[5]</sup>

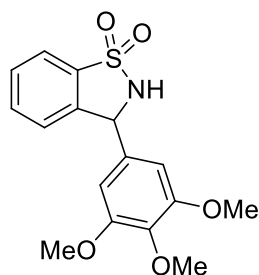

Yellow solid , 78% yield, Mp 189-191 °C.  $^1\text{H}$  NMR (400 MHz,  $\text{CDCl}_3$ )  $\delta$  7.89 – 7.75 (m, 1H), 7.68 – 7.49 (m, 2H), 7.24 – 7.15 (m, 1H), 6.57 (s, 2H), 5.63 (d,  $J = 2.3$  Hz, 1H), 5.24 (s, 1H), 3.81 (d,  $J = 3.2$  Hz, 9H).  $^{13}\text{C}$  NMR (101 MHz,  $\text{CDCl}_3$ )  $\delta$  153.8, 139.6, 138.3, 134.7, 134.3, 133.4, 129.6, 125.3, 121.2, 104.4, 61.6, 60.8, 56.2.

### 3-(4-phenoxyphenyl)-2,3-dihydrobenzo[*d*]isothiazole 1,1-dioxide (2k)

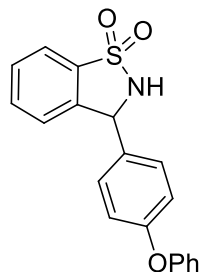

White solid, 91% yield, Mp 91-93°C.  $^1\text{H}$  NMR (400 MHz,  $\text{CDCl}_3$ )  $\delta$  7.94 – 7.82 (m, 1H), 7.67 – 7.53 (m, 2H), 7.41 – 7.30 (m, 4H), 7.17 (dd,  $J = 14.9, 7.4$  Hz, 2H), 7.09 – 6.95 (m, 4H), 5.74 (d,  $J = 3.9$  Hz, 1H), 5.03 (d,  $J = 3.5$  Hz, 1H).  $^{13}\text{C}$  NMR (101 MHz,  $\text{CDCl}_3$ )  $\delta$  158.3, 156.4, 139.9, 134.9, 133.4, 133.1, 129.9, 129.6, 129.2, 125.4, 123.9, 121.2, 119.4, 119.0, 60.9. HRMS calcd for  $\text{C}_{19}\text{H}_{15}\text{NO}_3\text{S}$   $[\text{M}]^+$  : 337.0773. Found: 337.0781.

**3-(4-fluorophenyl)-2,3-dihydrobenzo[*d*]isothiazole 1,1-dioxide (2l)<sup>[2]</sup>**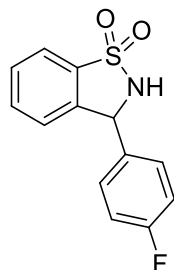

White solid, 98% yield, Mp 163-166 °C. <sup>1</sup>H NMR (400 MHz, CDCl<sub>3</sub>) δ 7.81 (m, 1H), 7.62 – 7.49 (m, 2H), 7.41 – 7.29 (m, 2H), 7.15 – 7.10 (m, 1H), 7.06 (t, *J* = 8.6 Hz, 2H), 5.72 (d, *J* = 4.1 Hz, 1H), 5.22 (d, *J* = 3.6 Hz, 1H). <sup>13</sup>C NMR (101 MHz, CDCl<sub>3</sub>) δ 164.3, 161.8, 139.6, 134.7, 134.6, 134.6, 133.5, 129.7, 129.5, 129.4, 125.3, 121.2, 116.4, 116.2, 60.6.

**3-(4-chlorophenyl)-2,3-dihydrobenzo[*d*]isothiazole 1,1-dioxide (2m)<sup>[5]</sup>**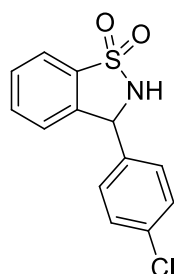

Light yellow solid, 98% yield, Mp 179-181 °C. <sup>1</sup>H NMR (400 MHz, CDCl<sub>3</sub>) δ 7.87 – 7.79 (m, 1H), 7.61 – 7.53 (m, 2H), 7.40 – 7.28 (m, 4H), 7.17 – 7.02 (m, 1H), 5.71 (d, *J* = 3.9 Hz, 1H), 5.18 (d, *J* = 3.4 Hz, 1H). <sup>13</sup>C NMR (101 MHz, CDCl<sub>3</sub>) δ 139.2, 137.3, 135.1, 134.6, 133.5, 129.8, 129.5, 128.9, 125.3, 121.3, 60.6.

**3-(4-(trifluoromethyl)phenyl)-2,3-dihydrobenzo[*d*]isothiazole****1,1-dioxide (2n)**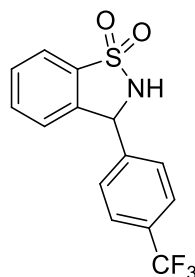

Yellow solid, 98% yield, Mp 134-136 °C. <sup>1</sup>H NMR (400 MHz, CDCl<sub>3</sub>) δ 7.83 (dd, *J* = 5.2, 2.0 Hz, 1H), 7.68 – 7.50 (m, 6H), 7.18 – 7.09 (m, 1H), 5.81 (s, 1H), 5.42 (s, 1H). <sup>13</sup>C NMR (101 MHz, CDCl<sub>3</sub>) δ 142.8, 138.7, 134.4, 133.6, 129.9, 127.9, 126.3, 126.2, 125.3, 121.4, 60.6. HRMS calcd for C<sub>14</sub>H<sub>10</sub>F<sub>3</sub>NO<sub>2</sub>S [M]<sup>+</sup>: 313.0384. Found: 313.0382.

**3-(naphthalen-2-yl)-2,3-dihydrobenzo[*d*]isothiazole 1,1-dioxide (2o)**

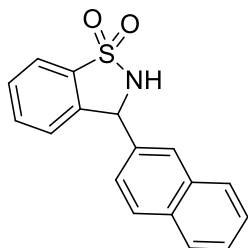

White solid, 90% yield, Mp 135-138°C. <sup>1</sup>H NMR (400 MHz, CDCl<sub>3</sub>) δ 7.85 – 7.70 (m, 5H), 7.45 (dd, *J* = 8.7, 3.5 Hz, 4H), 7.28 (d, *J* = 8.5 Hz, 1H), 7.11 – 6.99 (m, 1H), 5.80 (d, *J* = 3.9 Hz, 1H), 5.11 (d, *J* = 3.1 Hz, 1H). <sup>13</sup>C NMR (101 MHz, CDCl<sub>3</sub>) δ 139.7, 135.9, 134.8, 133.5, 133.4, 133.1, 129.6, 127.9, 127.3, 126.9, 126.8, 125.5, 124.4, 121.2, 61.59. HRMS calcd for C<sub>17</sub>H<sub>13</sub>NO<sub>2</sub>S [M]<sup>+</sup> : 295.0667. Found: 295.0670.

### 3-([1,1'-biphenyl]-4-yl)-2,3-dihydrobenzo[*d*]isothiazole 1,1-dioxide

(2p)

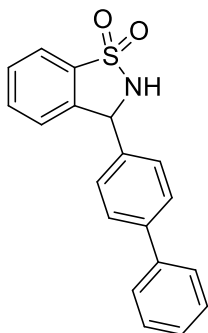

White solid, 94% yield, Mp 203-205 °C. <sup>1</sup>H NMR (400 MHz, CDCl<sub>3</sub>) δ 7.86 – 7.80 (m, 1H), 7.61 – 7.51 (m, 6H), 7.43 (dd, *J* = 11.8, 5.1 Hz, 4H), 7.36 (t, *J* = 7.3 Hz, 1H), 7.18 (d, *J* = 7.2 Hz, 1H), 5.76 (d, *J* = 4.0 Hz, 1H), 5.22 (d, *J* = 3.9 Hz, 1H). <sup>13</sup>C NMR (101 MHz, CDCl<sub>3</sub>) δ 142.0, 140.2, 139.8, 137.7, 134.7, 133.5, 129.7, 129.6, 128.9, 128.9, 128.1, 127.9, 127.8, 127.5, 127.1, 126.9, 125.5, 121.2, 61.1. HRMS calcd for C<sub>19</sub>H<sub>15</sub>NO<sub>2</sub>S [M]<sup>+</sup> : 321.0824. Found: 321.0820.

### 3-(3-(hydroxymethyl)phenyl)-2,3-dihydrobenzo[*d*]isothiazole

1,1-dioxide (2q)<sup>[2]</sup>

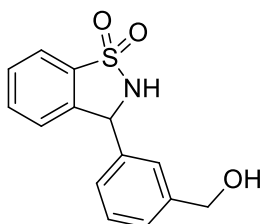

Colorless oil, 95% yield, <sup>1</sup>H NMR (400 MHz, CDCl<sub>3</sub>) δ 7.69 (dd, *J* = 5.7, 3.1 Hz, 1H), 7.46 – 7.42 (m, 2H), 7.26 (s, 1H), 7.23 – 7.14 (m, 3H), 7.05 (dd, *J* = 5.7, 2.7 Hz, 1H), 5.61 (d, *J* = 3.5 Hz, 1H), 5.58 (d, *J* = 3.7 Hz, 1H), 4.51 (s, 2H), 2.76 (s, 1H). <sup>13</sup>C NMR (101 MHz, CDCl<sub>3</sub>)



$\delta$  142.11, 139.7, 139.1, 134.5, 133.4, 129.5, 129.3, 127.6, 126.7, 125.9, 125.4, 121.1, 64.6, 61.3.

### 3-(3-(((tert-butyldimethylsilyl)oxy)methyl)phenyl)-2,3-dihydrobenzo[d]isothiazole 1,1-dioxide (2r)<sup>[2]</sup>

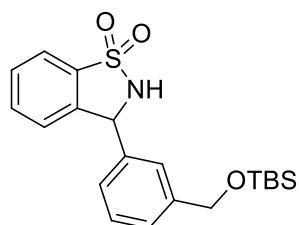

Yellow solid, 95% yield, Mp 57-59°C. <sup>1</sup>H NMR (400 MHz, CDCl<sub>3</sub>)  $\delta$  7.90 – 7.78 (m, 1H), 7.55 (dd, *J* = 6.1, 2.7 Hz, 2H), 7.34 (t, *J* = 10.9 Hz, 3H), 7.26 – 7.22 (m, 1H), 7.18 – 7.07 (m, 1H), 5.72 (d, *J* = 4.0 Hz, 1H), 5.00 (d, *J* = 3.9 Hz, 1H), 4.73 (s, 2H), 0.91 (s, 9H), 0.08 (s, 6H). <sup>13</sup>C NMR (101 MHz, CDCl<sub>3</sub>)  $\delta$  142.8, 142.2, 139.8, 139.1, 138.6, 134.8, 133.3, 129.4, 127.6, 126.7, 126.2, 125.9, 125.4, 125.1, 121.1, 64.6, 25.9, 18.6, -3.6, -5.3.

### 3-benzyl-2,3-dihydrobenzo[d]isothiazole 1,1-dioxide (2s)<sup>[2]</sup>

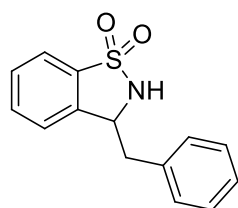

White solid, 25% yield, Mp 145-148 °C. <sup>1</sup>H NMR (400 MHz, CDCl<sub>3</sub>)  $\delta$  7.75 (d, *J* = 7.7 Hz, 1H), 7.60 – 7.48 (m, 2H), 7.35 – 7.22 (m, 6H), 4.84 (dt, *J* = 9.3, 4.5 Hz, 1H), 4.64 (s, 1H), 3.23 (dd, *J* = 13.8, 4.8 Hz, 1H), 2.96 (dd, *J* = 13.8, 9.6 Hz, 1H). <sup>13</sup>C NMR (101 MHz, CDCl<sub>3</sub>)  $\delta$  139.4, 136.4, 135.6, 133.0, 129.6, 129.4, 129.0, 127.5, 124.4, 121.5, 58.8, 42.4.

### 3-phenyl-2,3-dihydrobenzo[d]isothiazole 1,1-dioxide (3a)

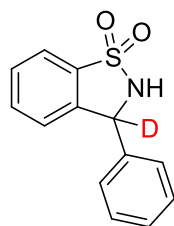

<sup>1</sup>H NMR (400 MHz, CDCl<sub>3</sub>)  $\delta$  7.93 – 7.80 (m, 1H), 7.65 – 7.52 (m, 2H), 7.48 – 7.33 (m, 5H), 7.23 – 7.08 (m, 1H), 5.09 (s, 1H). <sup>13</sup>C NMR (101 MHz, CDCl<sub>3</sub>)  $\delta$  139.8, 138.7, 134.8, 133.4, 129.6, 129.3, 129.1, 127.6, 125.4, 121.2, 61.3, 60.1 (t, *J* = 22 Hz).

### 3-(*p*-tolyl)-2,3-dihydrobenzo[d]isothiazole 1,1-dioxide (3b)<sup>[2]</sup>

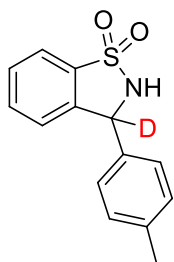

$^1\text{H}$  NMR (400 MHz,  $\text{CDCl}_3$ )  $\delta$  7.90 – 7.77 (m, 1H), 7.61 – 7.49 (m, 2H), 7.28 – 7.22 (m, 2H), 7.19 (d,  $J = 7.8$  Hz, 2H), 7.13 (d,  $J = 7.6$  Hz, 1H), 4.95 (s, 1H), 2.35 (s, 3H).  $^{13}\text{C}$  NMR (101 MHz,  $\text{CDCl}_3$ )  $\delta$  140.1, 139.2, 135.6, 134.9, 133.4, 129.9, 129.5, 127.6, 125.4, 121.1, 60.9 (t,  $J = 22$  Hz), 21.2.

### 3-(4-ethylphenyl)-2,3-dihydrobenzo[*d*]isothiazole 1,1-dioxide (3c)

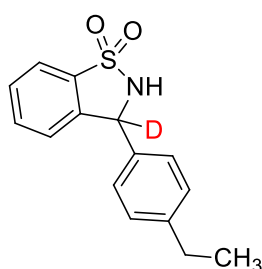

$^1\text{H}$  NMR (400 MHz,  $\text{CDCl}_3$ )  $\delta$  7.79 – 7.70 (m, 1H), 7.48 (ddd,  $J = 6.3, 5.3, 1.0$  Hz, 2H), 7.19 (d,  $J = 7.7$  Hz, 2H), 7.14 (d,  $J = 8.0$  Hz, 2H), 7.09 – 7.04 (m, 1H), 4.90 (s, 1H), 2.57 (q,  $J = 7.6$  Hz, 2H), 1.15 (t,  $J = 7.6$  Hz, 3H).  $^{13}\text{C}$  NMR (101 MHz,  $\text{CDCl}_3$ )  $\delta$  145.4, 140.1, 135.8, 135.0, 133.3, 129.4, 128.8, 127.6, 125.4, 121.1, 60.9 (t,  $J = 23\text{Hz}$ ), 28.6, 15.4.

### 3-(4-(*tert*-butyl)phenyl)-2,3-dihydrobenzo[*d*]isothiazole 1,1-dioxide

(3d)

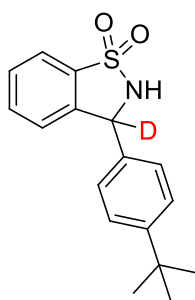

$^1\text{H}$  NMR (400 MHz,  $\text{CDCl}_3$ )  $\delta$  7.82 (dd,  $J = 6.2, 2.7$  Hz, 1H), 7.54 (ddd,  $J = 5.9, 5.2, 3.4$  Hz, 2H), 7.39 (d,  $J = 8.3$  Hz, 2H), 7.31 – 7.25 (m, 2H), 7.19 – 7.12 (m, 1H), 5.02 (s, 1H), 1.30 (s, 9H).  $^{13}\text{C}$  NMR (101 MHz,  $\text{CDCl}_3$ )  $\delta$  152.2, 140.0, 135.6, 135.0, 133.3, 129.4, 127.4, 126.2, 125.5, 121.1, 60.8 (t,  $J = 22\text{Hz}$ ), 34.7, 31.3.

### 3-(*m*-tolyl)-2,3-dihydrobenzo[*d*]isothiazole 1,1-dioxide (3e)

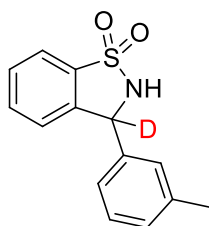

$^1\text{H}$  NMR (400 MHz,  $\text{CDCl}_3$ )  $\delta$  7.89 – 7.80 (m, 1H), 7.63 – 7.50 (m, 2H), 7.29 (d,  $J = 7.8$  Hz, 1H), 7.15 (m, 4H), 4.92 (s, 1H), 2.34 (s, 3H).  $^{13}\text{C}$  NMR (101 MHz,  $\text{CDCl}_3$ )  $\delta$  139.9, 139.3, 138.5, 134.9, 133.4, 129.9, 129.5, 129.2, 128.1, 125.4, 124.7, 121.1, 61.1 (t,  $J = 22$  Hz), 21.4.

### 3-(*o*-tolyl)-2,3-dihydrobenzo[*d*]isothiazole 1,1-dioxide (3f)

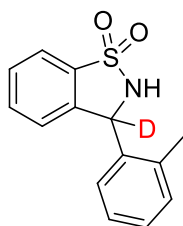

$^1\text{H}$  NMR (400 MHz,  $\text{CDCl}_3$ )  $\delta$  7.85 (dd,  $J = 5.5, 3.3$  Hz, 1H), 7.57 (dd,  $J = 6.1, 2.6$  Hz, 2H), 7.24 (d,  $J = 7.2$  Hz, 2H), 7.21 – 7.15 (m, 1H), 7.12 (d,  $J = 7.0$  Hz, 2H), 4.86 (s, 1H), 2.45 (s, 3H).  $^{13}\text{C}$  NMR (101 MHz,  $\text{CDCl}_3$ )  $\delta$  140.0, 136.8, 136.2, 135.7, 133.4, 131.3, 129.5, 129.1, 128.1, 127.1, 125.3, 121.3, 57.9 (t,  $J = 24$  Hz), 19.4.

### 3-(4-methoxyphenyl)-2,3-dihydrobenzo[*d*]isothiazole 1,1-dioxide (4g)

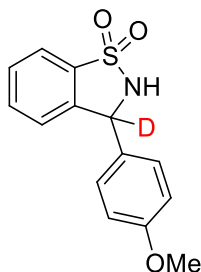

$^1\text{H}$  NMR (400 MHz,  $\text{CDCl}_3$ )  $\delta$  7.95 – 7.73 (m, 1H), 7.66 – 7.49 (m, 2H), 7.33 – 7.20 (m, 2H), 7.13 (d,  $J = 6.3$  Hz, 1H), 6.89 (dd,  $J = 8.6, 1.9$  Hz, 2H), 5.02 (s, 1H), 3.81 (s, 3H).  $^{13}\text{C}$  NMR (101 MHz,  $\text{CDCl}_3$ )  $\delta$  160.2, 140.2, 135.1, 133.3, 130.6, 129.4, 128.9, 125.4, 121.1, 114.6, 60.7 (t,  $J = 22$  Hz), 55.4.

### 3-(2-methoxyphenyl)-2,3-dihydrobenzo[*d*]isothiazole 1,1-dioxide (3h)

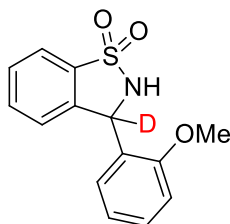

$^1\text{H}$  NMR (400 MHz,  $\text{CDCl}_3$ )  $\delta$  7.77 – 7.71 (m, 1H), 7.51 – 7.40 (m, 2H), 7.31 – 7.23 (m, 1H), 7.19 (d,  $J = 1.8$  Hz, 1H), 7.17 – 7.12 (m, 1H), 6.91 – 6.83 (m, 2H), 4.97 (s, 1H), 3.77 (s,

3H).<sup>13</sup>C NMR (101 MHz, CDCl<sub>3</sub>) δ 157.0, 140.4, 135.4, 133.1, 130.3, 129.2, 128.8, 126.3, 125.2, 121.3, 121.1, 111.1, 55.6.

### 3-(3-methoxyphenyl)-2,3-dihydrobenzo[*d*]isothiazole 1,1-dioxide (3i)

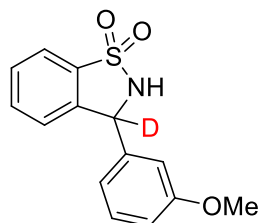

<sup>1</sup>H NMR (400 MHz, CDCl<sub>3</sub>) δ 7.95 – 7.71 (m, 1H), 7.63 – 7.51 (m, 2H), 7.30 (td, *J* = 7.6, 1.2 Hz, 1H), 7.22 – 7.14 (m, 1H), 6.99 – 6.93 (m, 1H), 6.93 – 6.86 (m, 2H), 5.06 (s, 1H), 3.78 (s, 3H).<sup>13</sup>C NMR (101 MHz, CDCl<sub>3</sub>) δ 160.3, 140.2, 139.6, 134.8, 133.4, 130.4, 129.5, 125.4, 121.2, 119.7, 114.6, 112.9, 60.9 (t, *J* = 22 Hz), 55.4.

### 3-(3,4,5-trimethoxyphenyl)-2,3-dihydrobenzo[*d*]isothiazole

#### 1,1-dioxide (3j)

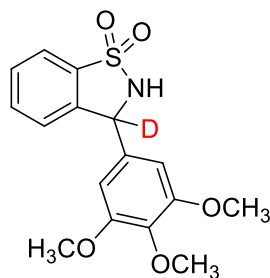

<sup>1</sup>H NMR (400 MHz, CDCl<sub>3</sub>) δ 7.86 – 7.78 (m, 1H), 7.64 – 7.51 (m, 2H), 7.20 (dd, *J* = 6.4, 1.9 Hz, 1H), 6.58 (s, 2H), 5.11 (s, 1H), 3.82 (d, *J* = 3.6 Hz, 9H).<sup>13</sup>C NMR (101 MHz, CDCl<sub>3</sub>) δ 153.8, 139.6, 138.4, 134.8, 134.2, 133.4, 129.6, 125.3, 121.2, 104.4, 61.1 (t, *J* = 22Hz), 60.9, 56.3.

### 3-(4-phenoxyphenyl)-2,3-dihydrobenzo[*d*]isothiazole 1,1-dioxide (3k)

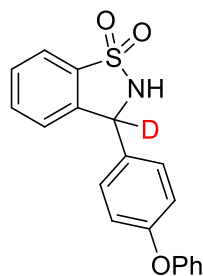

<sup>1</sup>H NMR (400 MHz, CDCl<sub>3</sub>) δ 7.86 (dd, *J* = 6.7, 1.8 Hz, 1H), 7.59 (dd, *J* = 7.3, 1.3 Hz, 2H), 7.43 – 7.30 (m, 4H), 7.22 – 7.13 (m, 2H), 7.07 – 6.97 (m, 4H), 5.05 (s, 1H).<sup>13</sup>C NMR (101 MHz, CDCl<sub>3</sub>) δ 158.3, 156.4, 139.8, 135.0, 133.4, 133.0, 129.9, 129.6, 129.2, 125.4, 123.9, 121.2, 119.4, 119.0, 60.5 (t, *J* = 17Hz).

### 3-(4-fluorophenyl)-2,3-dihydrobenzo[*d*]isothiazole 1,1-dioxide (3l)

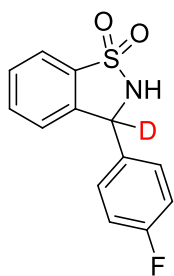

$^1\text{H}$  NMR (400 MHz,  $\text{CDCl}_3$ )  $\delta$  7.83 (dd,  $J = 5.9, 2.4$  Hz, 1H), 7.62 – 7.51 (m, 2H), 7.44 – 7.31 (m, 2H), 7.22 – 6.95 (m, 3H), 5.16 (s, 1H).  $^{13}\text{C}$  NMR (101 MHz,  $\text{CDCl}_3$ )  $\delta$  164.3, 161.8, 139.5, 134.7, 134.6, 134.5, 133.5, 129.7, 129.5, 129.4, 125.3, 121.2, 116.4, 116.2, 60.4 (t,  $J = 23$  Hz).

### 3-(4-chlorophenyl)-2,3-dihydrobenzo[*d*]isothiazole 1,1-dioxide (3m)

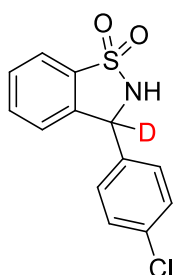

$^1\text{H}$  NMR (400 MHz,  $\text{CDCl}_3$ )  $\delta$  7.86 – 7.77 (m, 1H), 7.59 – 7.50 (m, 2H), 7.33 (ddd,  $J = 17.9, 5.0, 1.5$  Hz, 4H), 7.16 – 7.04 (m, 1H), 5.05 (s, 1H).  $^{13}\text{C}$  NMR (101 MHz,  $\text{CDCl}_3$ )  $\delta$  139.2, 137.2, 135.1, 134.7, 133.5, 129.8, 129.5, 128.9, 125.3, 121.3, 60.4 (t,  $J = 46$  Hz).

### 3-(4-(trifluoromethyl)phenyl)-2,3-dihydrobenzo[*d*]isothiazole

#### 1,1-dioxide (2n)

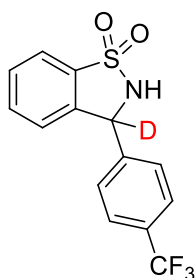

$^1\text{H}$  NMR (400 MHz,  $\text{CDCl}_3$ )  $\delta$  7.87 – 7.81 (m, 1H), 7.64 (d,  $J = 8.2$  Hz, 2H), 7.60 – 7.51 (m, 4H), 7.17 – 7.11 (m, 1H), 5.31 (s, 1H).  $^{13}\text{C}$  NMR (101 MHz,  $\text{CDCl}_3$ )  $\delta$  142.7, 138.7, 134.5, 133.6, 129.9, 127.9, 126.3, 126.2, 125.3, 121.4, 60.3 (t,  $J = 23$  Hz).

### 3-(naphthalen-2-yl)-2,3-dihydrobenzo[*d*]isothiazole 1,1-dioxide (3o)

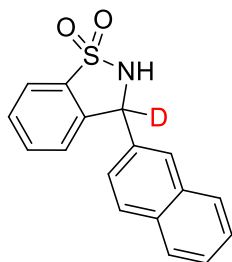

$^1\text{H}$  NMR (400 MHz,  $\text{CDCl}_3$ )  $\delta$  7.83 (dd,  $J = 12.8, 8.3$  Hz, 5H), 7.51 (m, 4H), 7.33 (d,  $J = 8.5$  Hz, 1H), 7.11 (dd,  $J = 4.8, 2.3$  Hz, 1H), 5.03 (s, 1H).  $^{13}\text{C}$  NMR (101 MHz,  $\text{CDCl}_3$ )  $\delta$  139.6, 135.8, 134.8, 133.5, 133.1, 133.0, 129.7, 128.0, 127.9, 127.3, 126.9, 126.9, 125.5, 124.4, 121.3, 61.7.

### 3-([1,1'-biphenyl]-4-yl)-2,3-dihydrobenzo[*d*]isothiazole 1,1-dioxide

(3p)

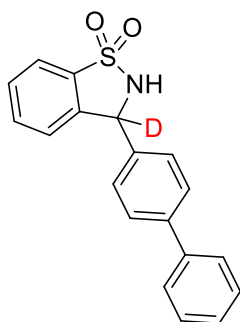

$^1\text{H}$  NMR (400 MHz,  $\text{CDCl}_3$ )  $\delta$  7.87 – 7.80 (m, 1H), 7.60 – 7.53 (m, 6H), 7.47 – 7.41 (m, 4H), 7.39 – 7.34 (m, 1H), 7.21 – 7.14 (m, 1H), 5.17 (s, 1H).  $^{13}\text{C}$  NMR (101 MHz,  $\text{CDCl}_3$ )  $\delta$  142.1, 140.2, 139.7, 137.6, 134.8, 133.5, 132.9, 129.6, 128.9, 128.9, 128.1, 127.9, 127.8, 127.5, 127.1, 126.9, 125.5, 121.2, 60.8 (t,  $J = 22$  Hz).

### 3-(3-(hydroxymethyl)phenyl)-2,3-dihydrobenzo[*d*]isothiazole

1,1-dioxide (3q)

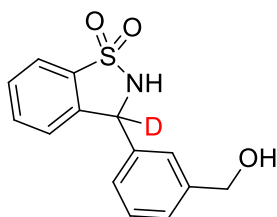

$^1\text{H}$  NMR (400 MHz,  $\text{CDCl}_3$ )  $\delta$  7.75 – 7.67 (m, 1H), 7.50 – 7.42 (m, 2H), 7.22 (ddd,  $J = 16.9, 8.9, 2.5$  Hz, 4H), 7.10 – 7.02 (m, 1H), 5.45 (s, 1H), 4.54 (s, 2H), 2.54 (s, 1H).  $^{13}\text{C}$  NMR (101 MHz,  $\text{CDCl}_3$ )  $\delta$  142.1, 139.6, 139.0, 134.6, 133.4, 129.6, 129.4, 127.6, 126.8, 125.9, 125.4, 121.2, 64.6, 60.9 (t,  $J = 28$  Hz).

### 3-(3-(((*tert*-butyl)dimethylsilyloxy)methyl)phenyl)-2,3-dihydrobenzo[*d*]isothiazole 1,1-dioxide (3r)

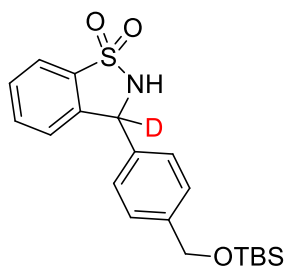

$^1\text{H}$  NMR (400 MHz,  $\text{CDCl}_3$ )  $\delta$  7.84 (dd,  $J = 6.2, 2.8$  Hz, 1H), 7.56 (dd,  $J = 9.1, 4.9$  Hz, 2H), 7.39 – 7.28 (m, 3H), 7.25 (dd,  $J = 7.7, 5.7$  Hz, 1H), 7.17 – 7.11 (m, 1H), 4.98 (s, 1H), 4.73 (s, 2H), 0.91 (s, 9H), 0.08 (s, 6H).  $^{13}\text{C}$  NMR (101 MHz,  $\text{CDCl}_3$ )  $\delta$  142.2, 139.6, 139.0, 133.4, 129.6, 129.4, 127.6, 126.7, 125.9, 125.4, 121.2, 64.7, 61.1 (t,  $J = 17\text{Hz}$ ), 25.9, 25.7, 17.9, -3.6, -5.3.

### Notes and references:

- [1] B. Song, C.-B. Yu, W.-X. Huang, M.-W. Chen and Y.-G. Zhou, *Org. Lett.*, 2015, **17**, 190.  
[b] C. A. Osborne, T. B. D. Endean and E. R. Jarvo, *Org. Lett.*, 2015, **17**, 5340.  
[2] C.-B. Yu, D.-W. Wang and Y.-G. Zhou, *J. Org. Chem.*, 2009, **74**, 5633.  
[3] Y. Li, M. Lei, W. Yuan, E. Meggers and L. Gong, *Chem. Commun.*, 2017, **53**, 8089.  
[4] Q. Yang, G. Shang, W.-Z. Gao, J.-G. Deng and X.-M. Zhang, *Angew. Chem. Int. Ed.*, 2006, **45**, 3832.  
[5] Y.-H. Dong, Q.-W. Ni, S.-T. Ma and Z.-P. Liu, *Heterocycles*, 2010, **81**, 637.  
[6] B. Song, C.-B. Yu, W.-X. Huang, M.-W. Chen, Y.-G. Zhou, *Org. Lett.*, 2015, **17**, 190.  
[7] The University of Tennessee Research Corporation - US6458962, 2002, B1.

## Part IV NMR spectra

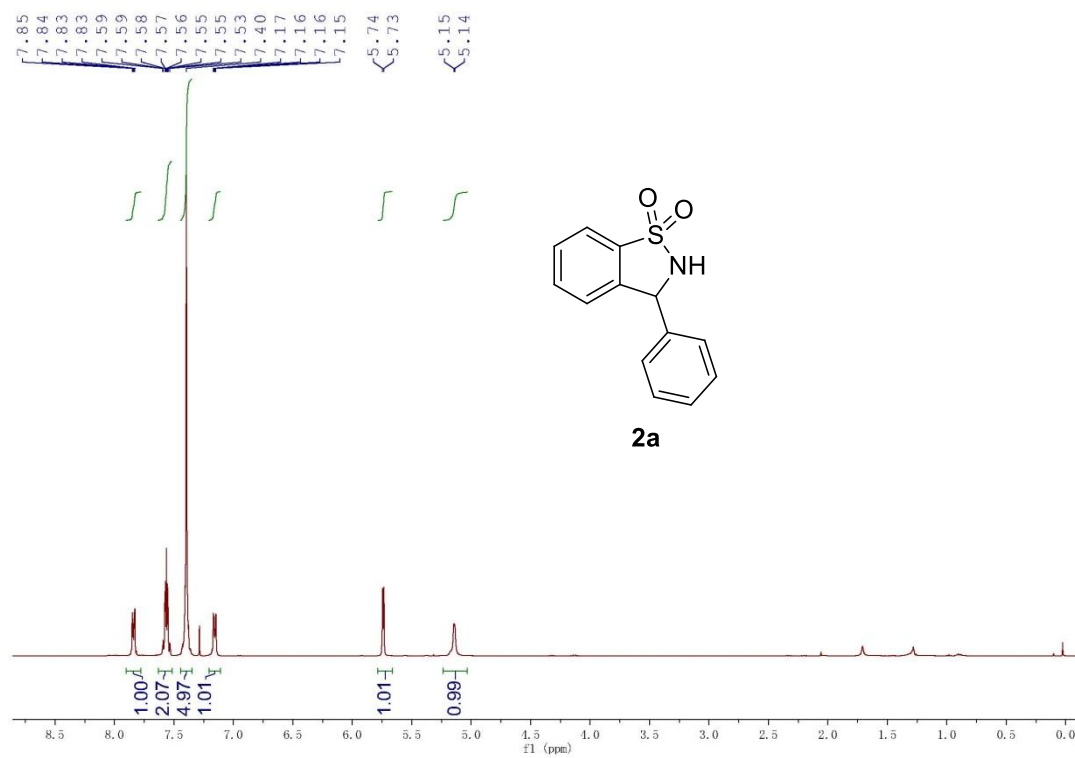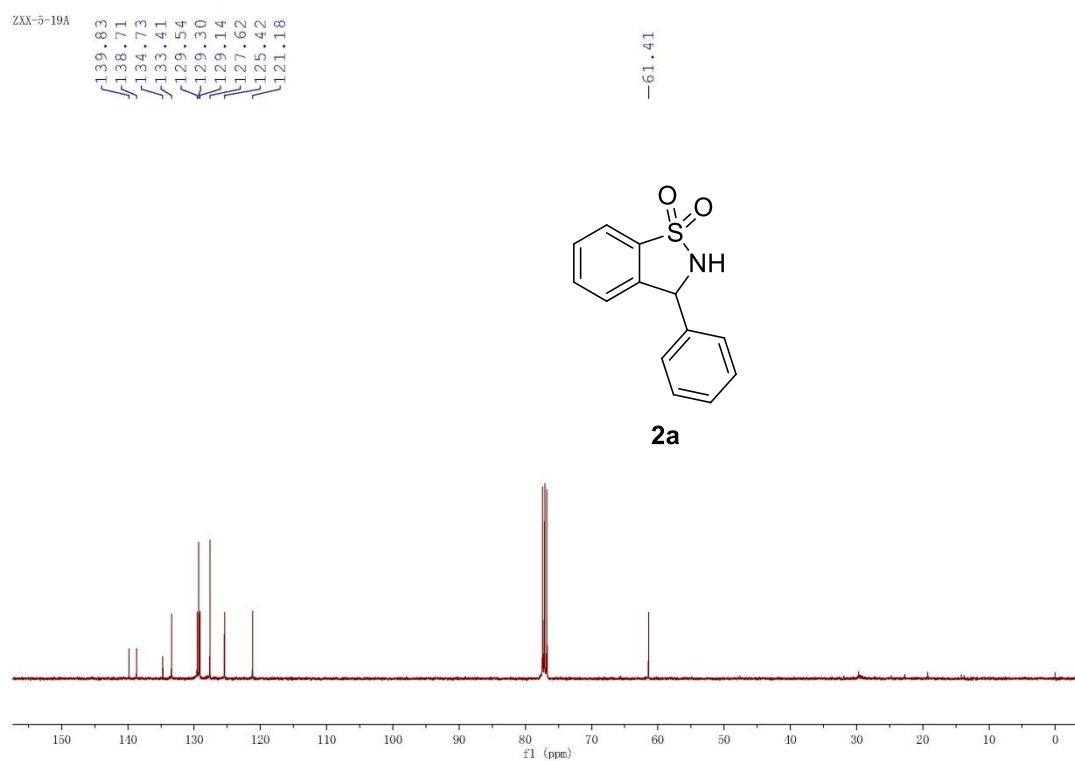



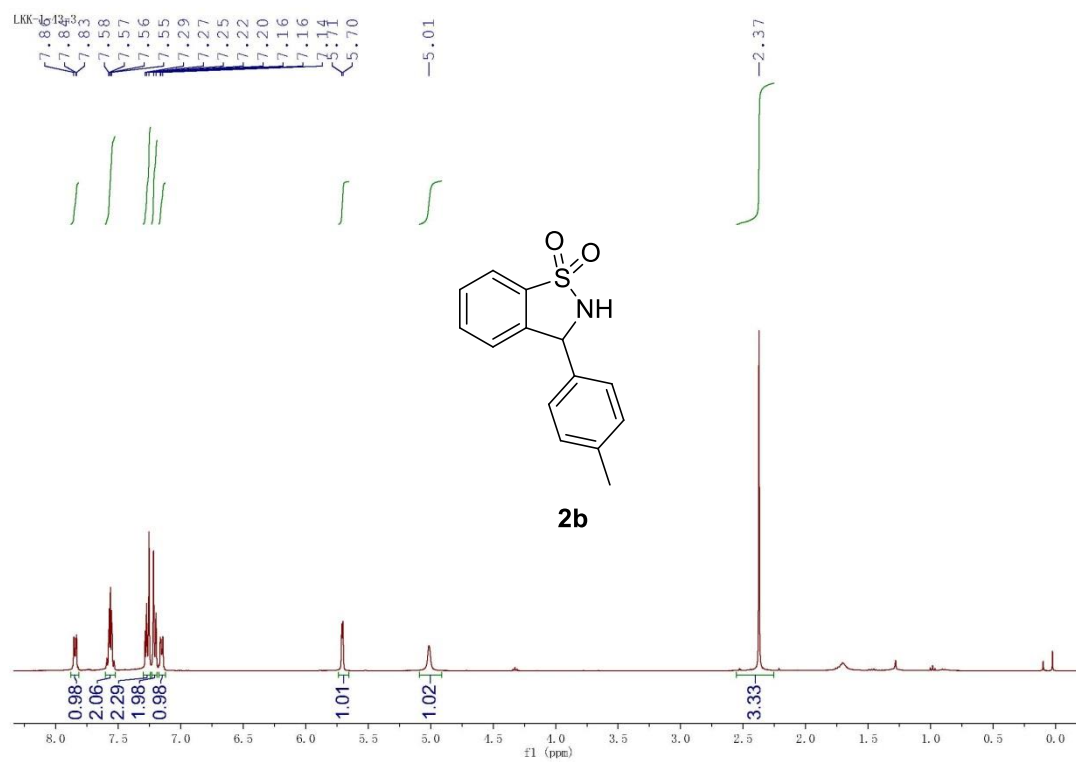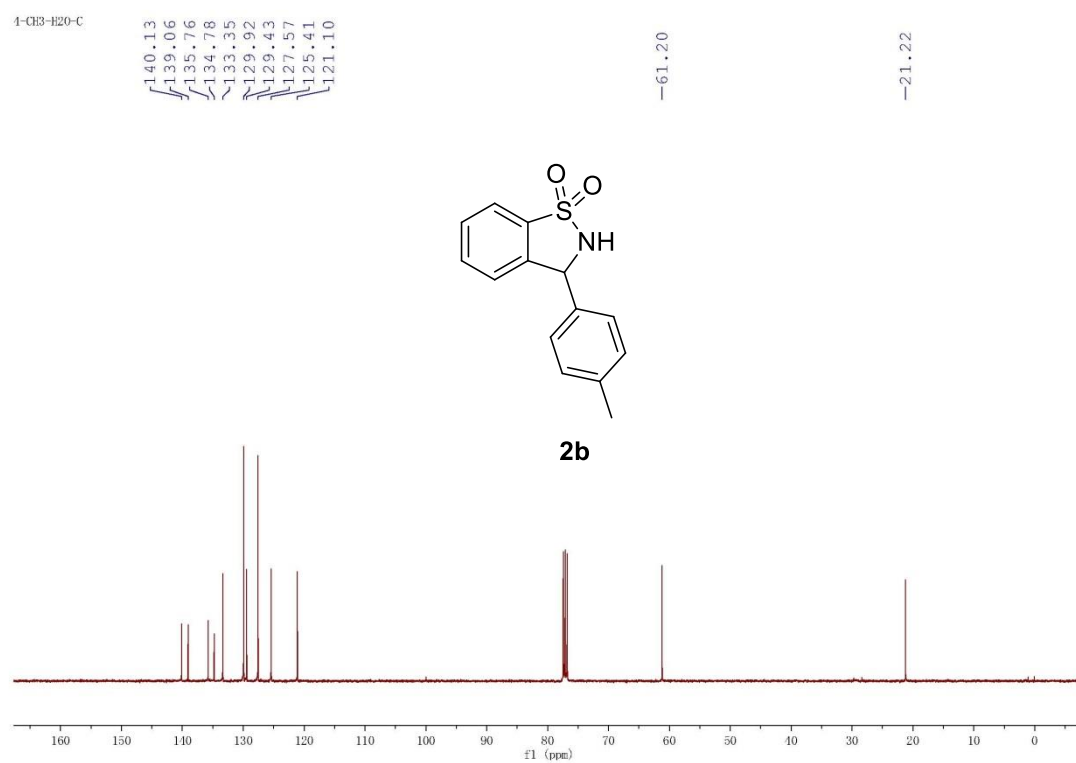

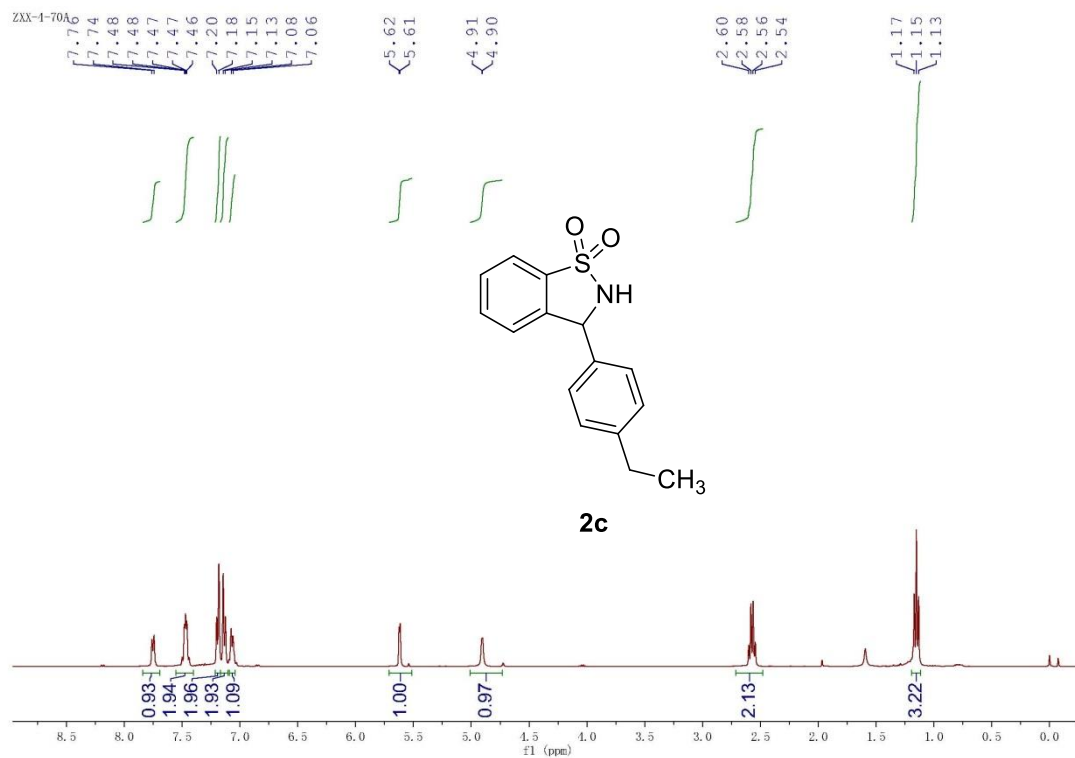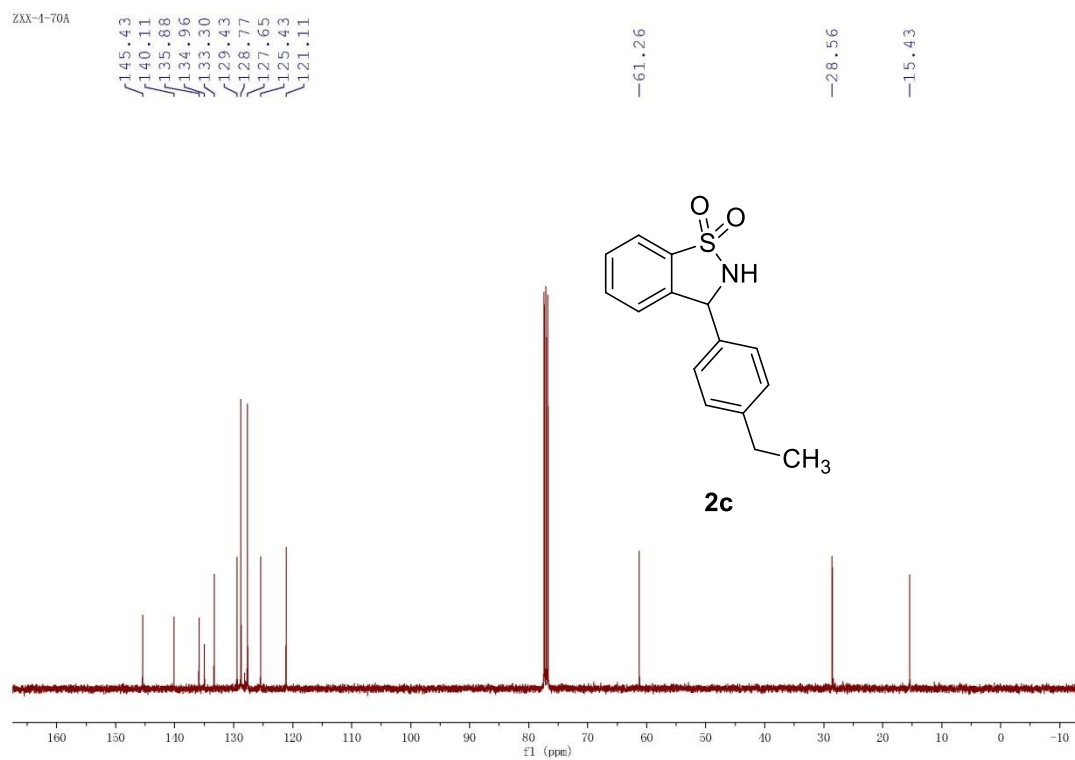

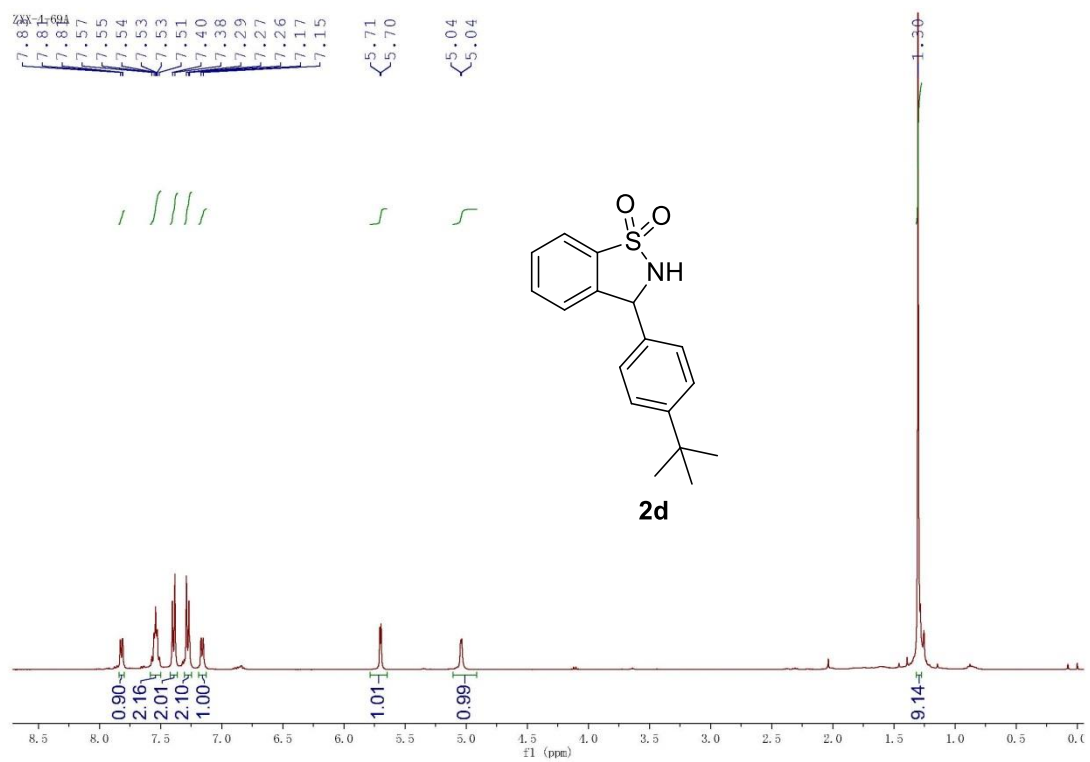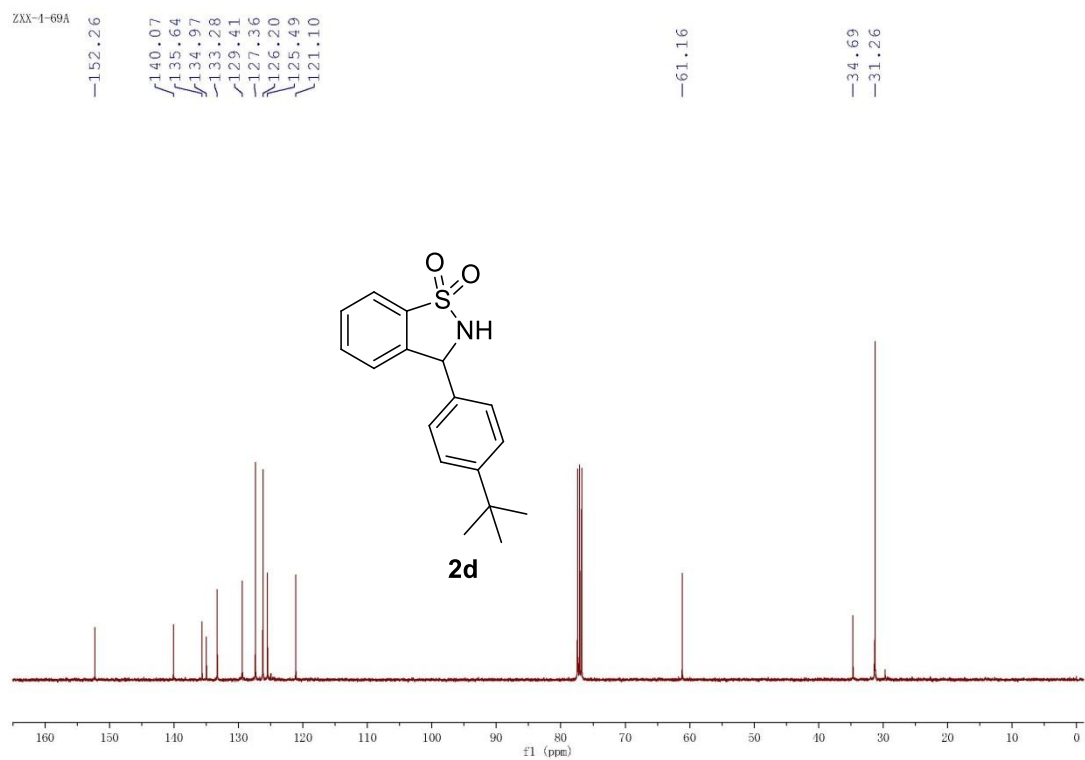

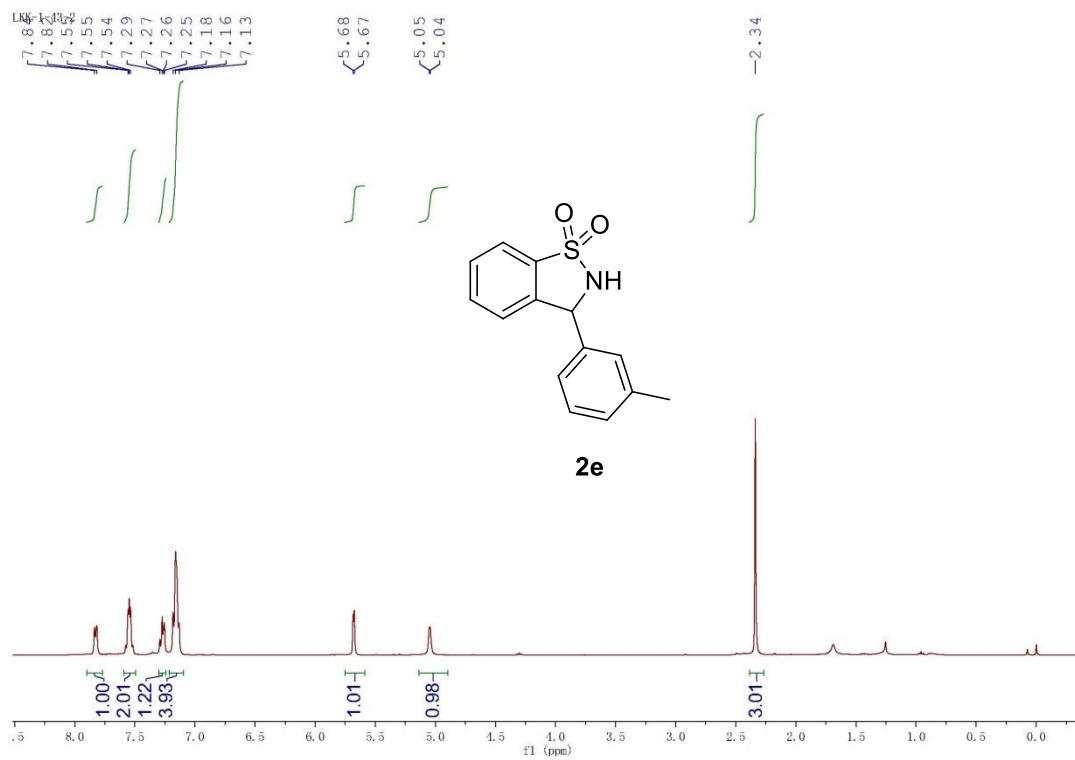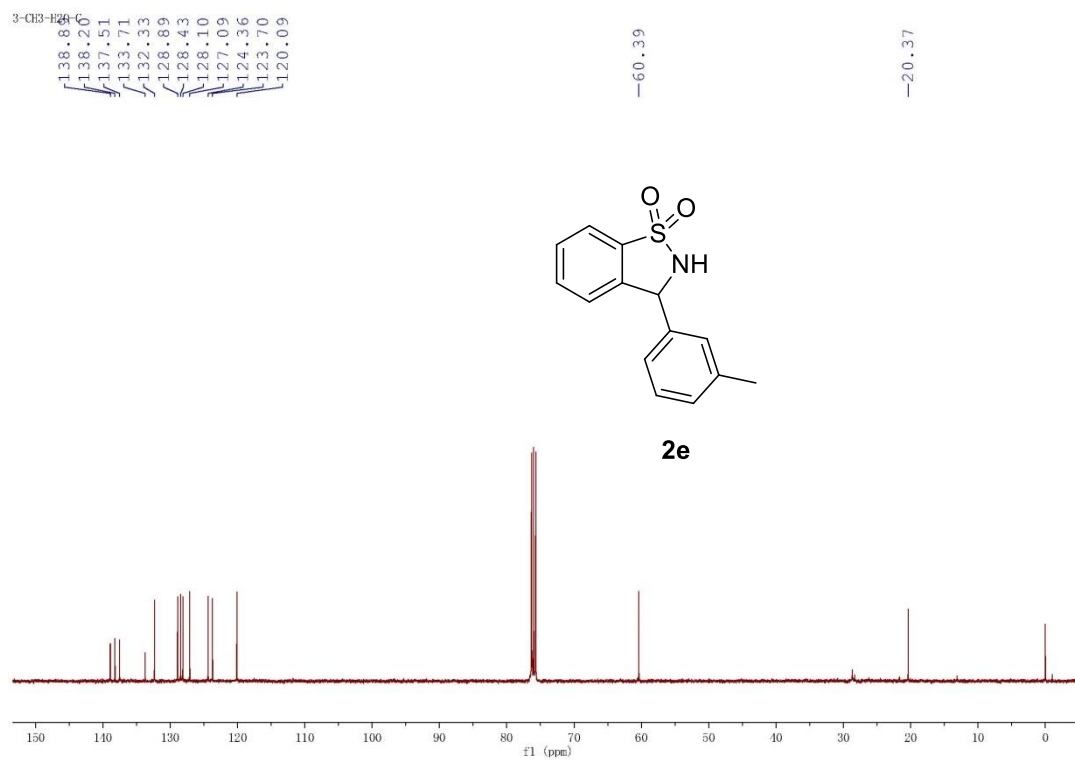

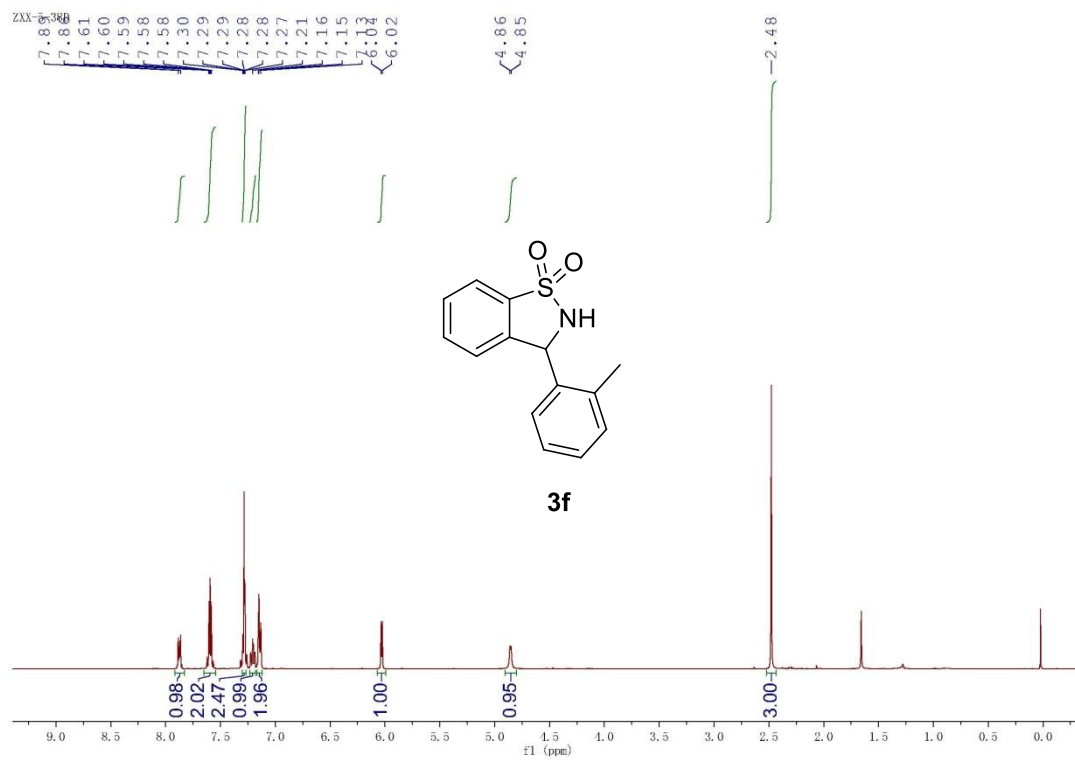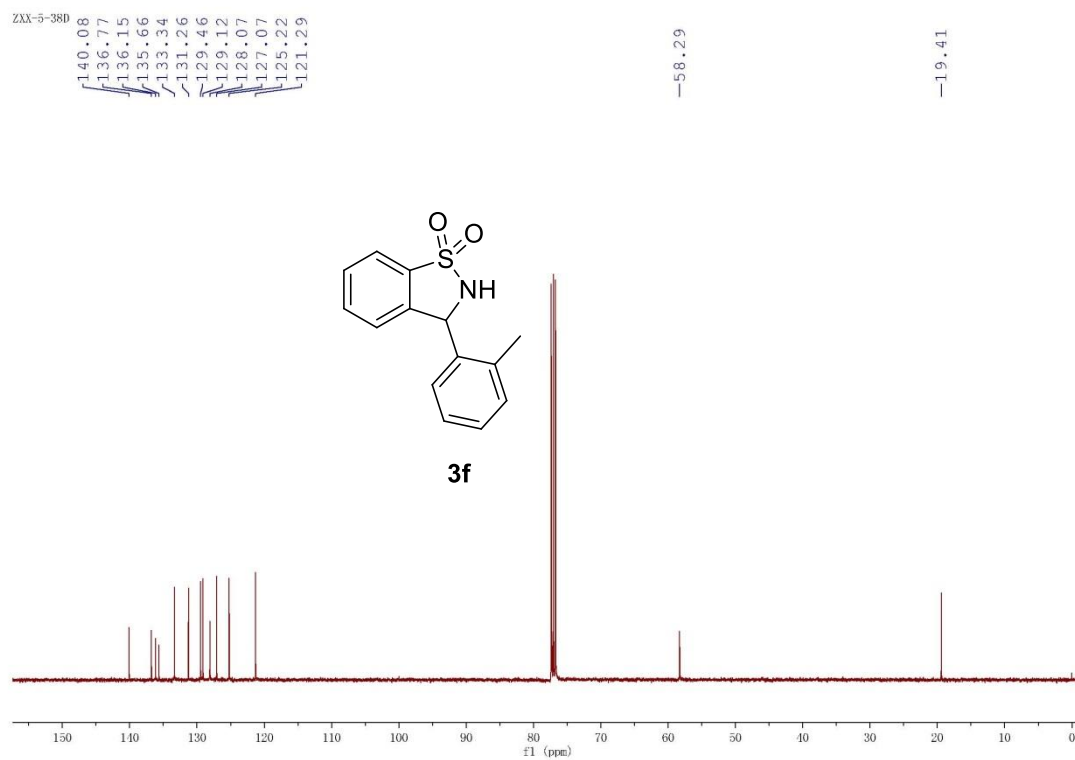

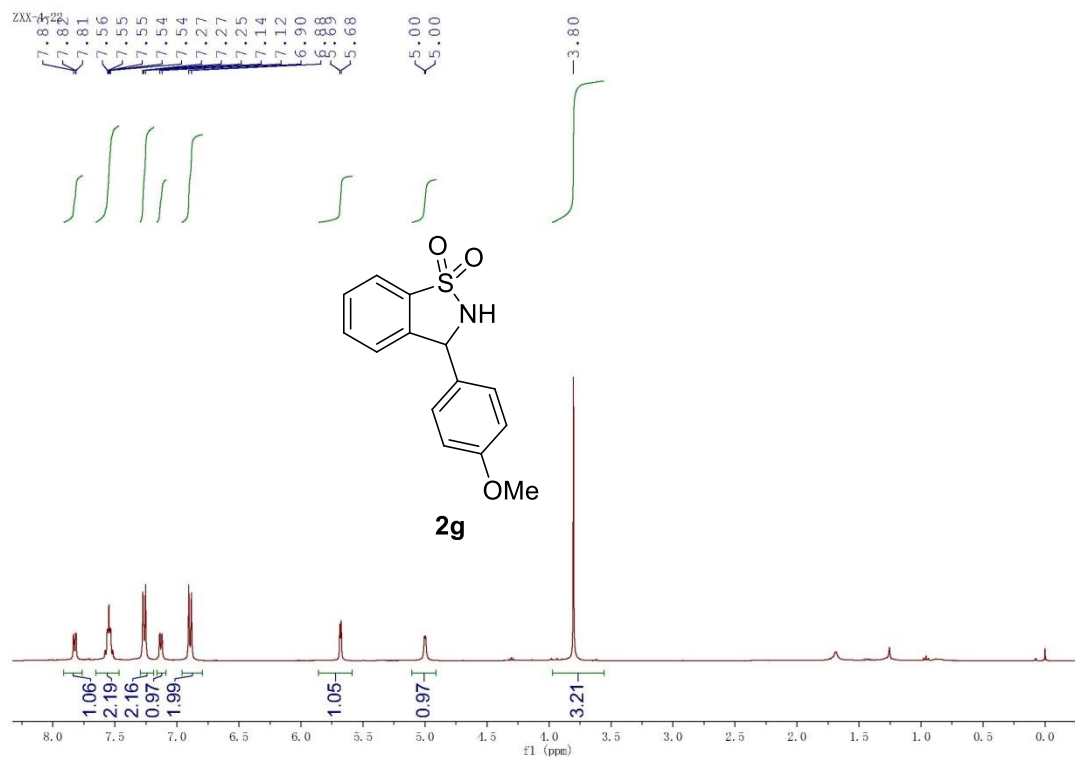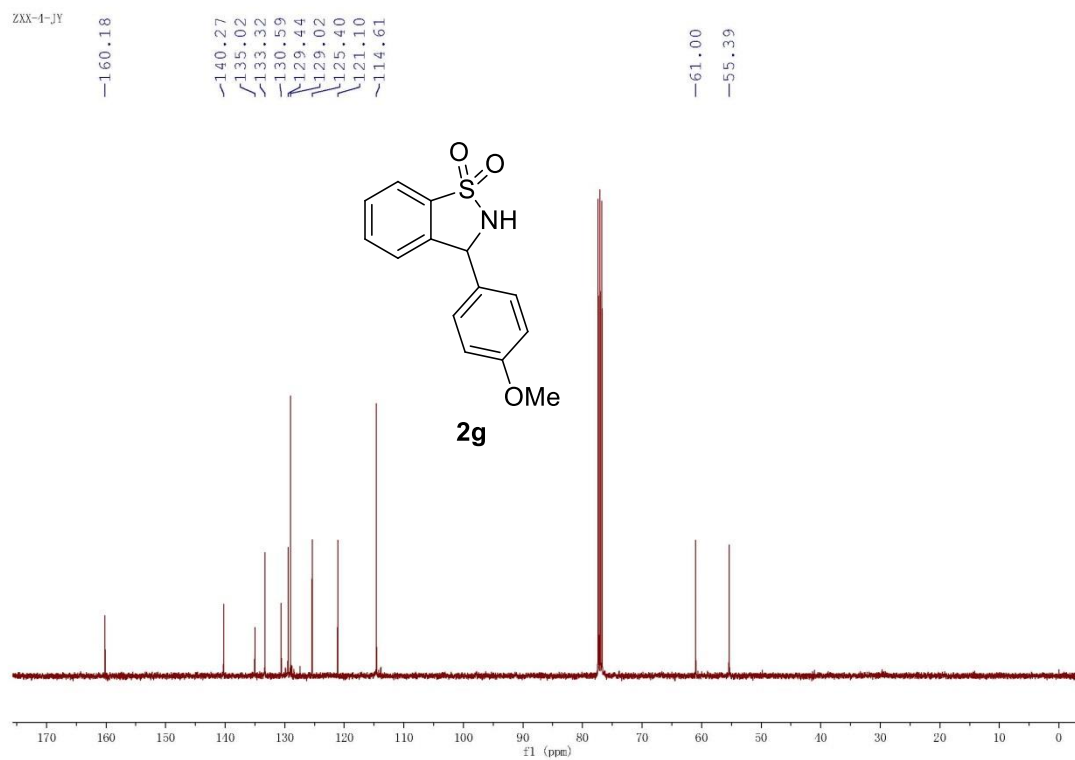

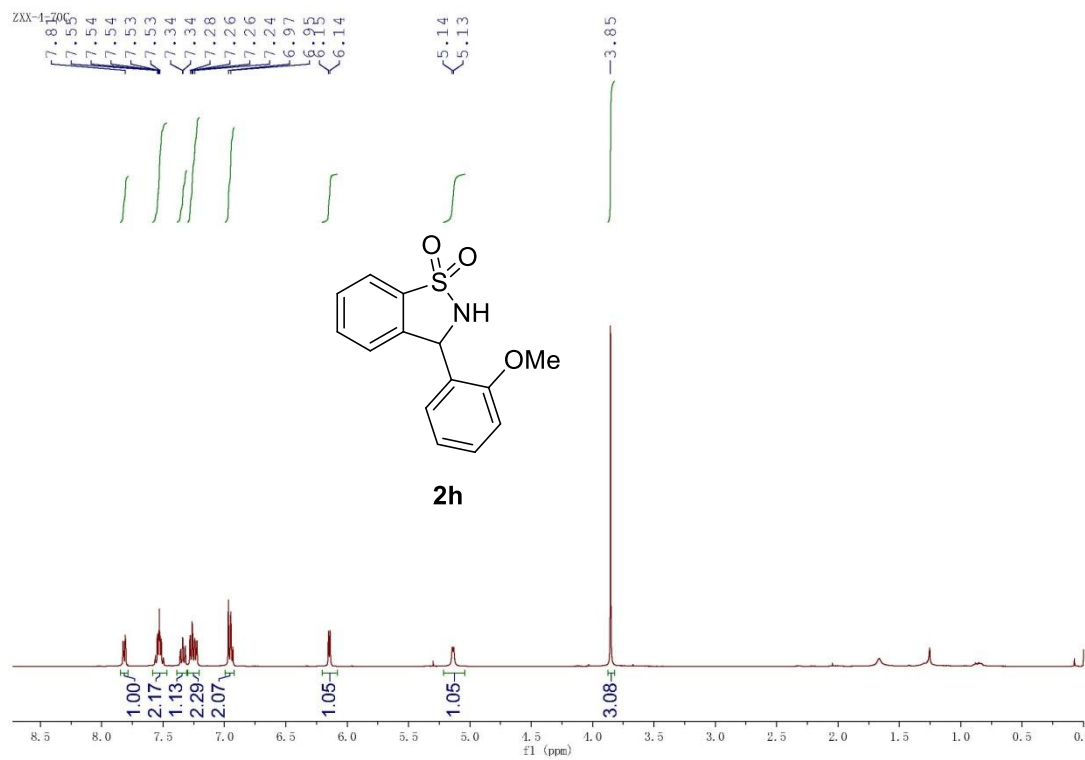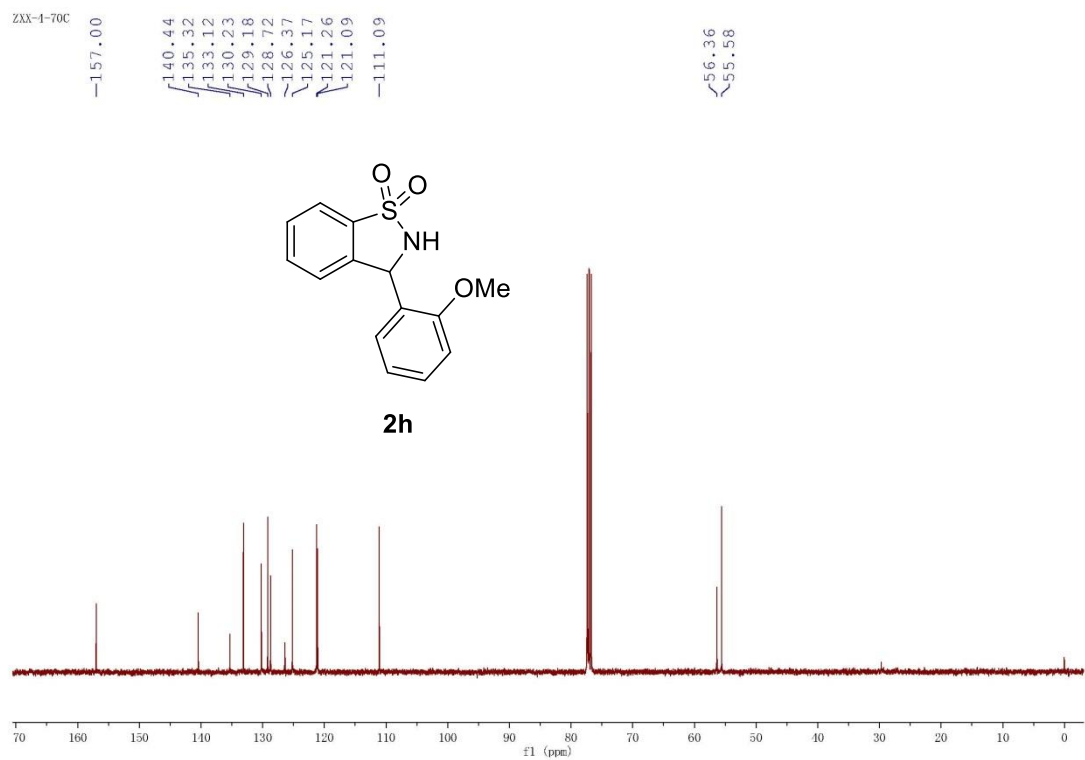

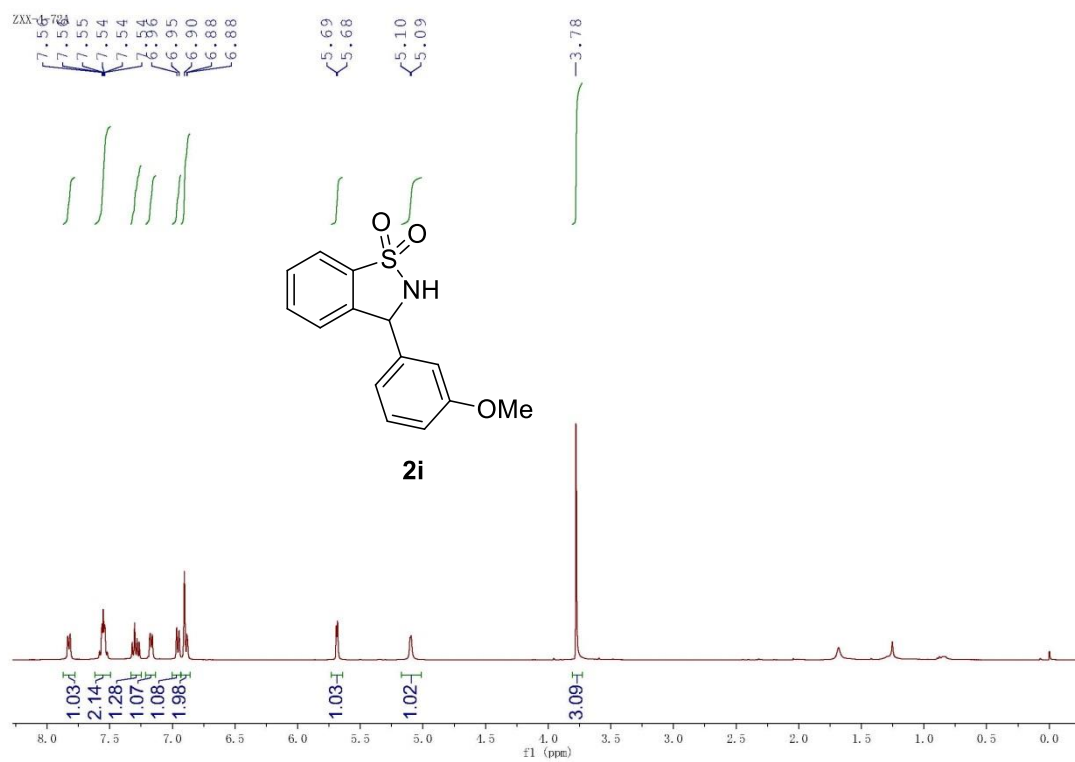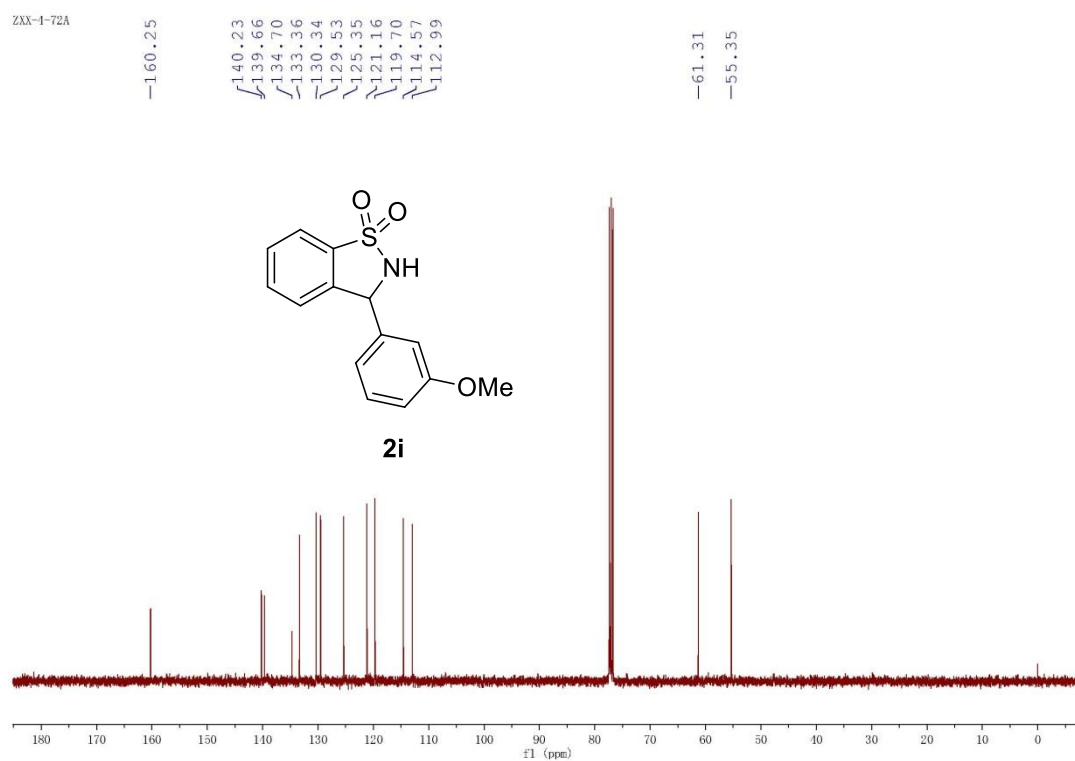



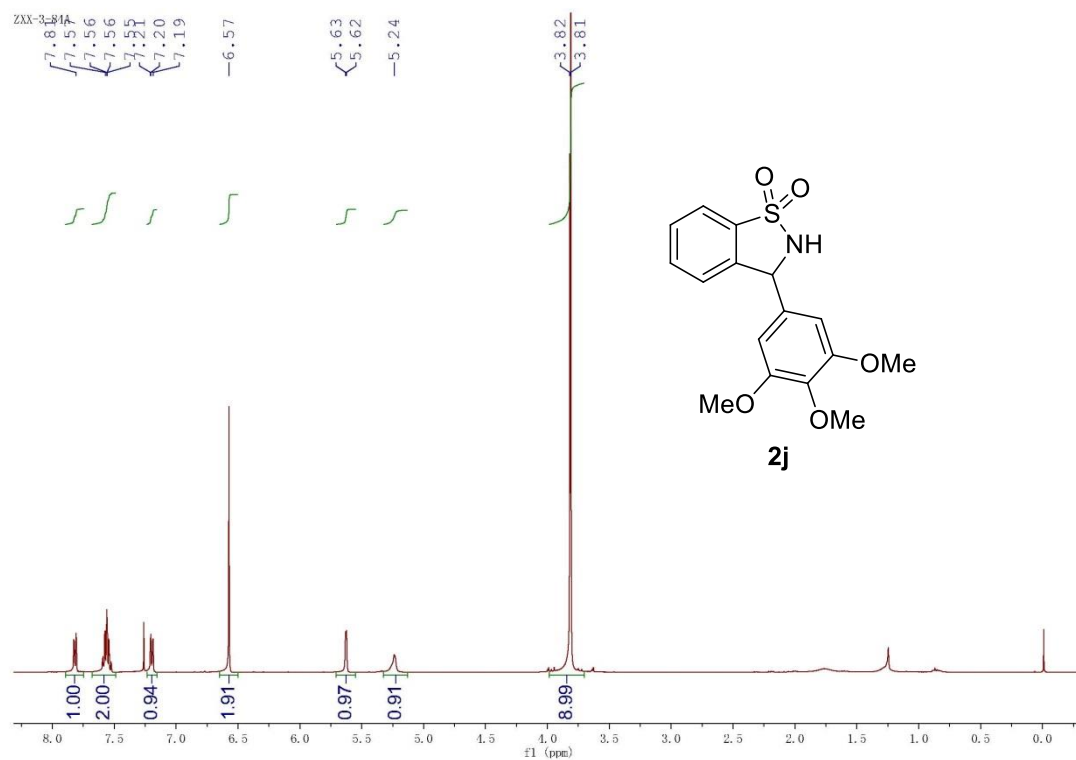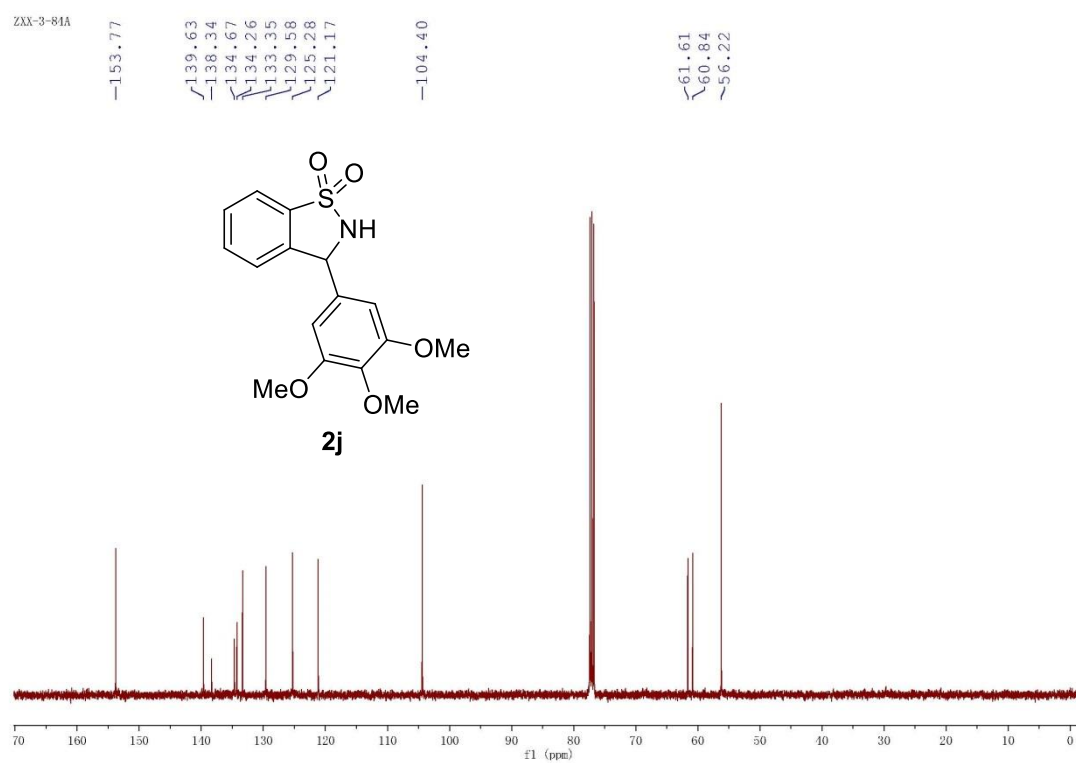

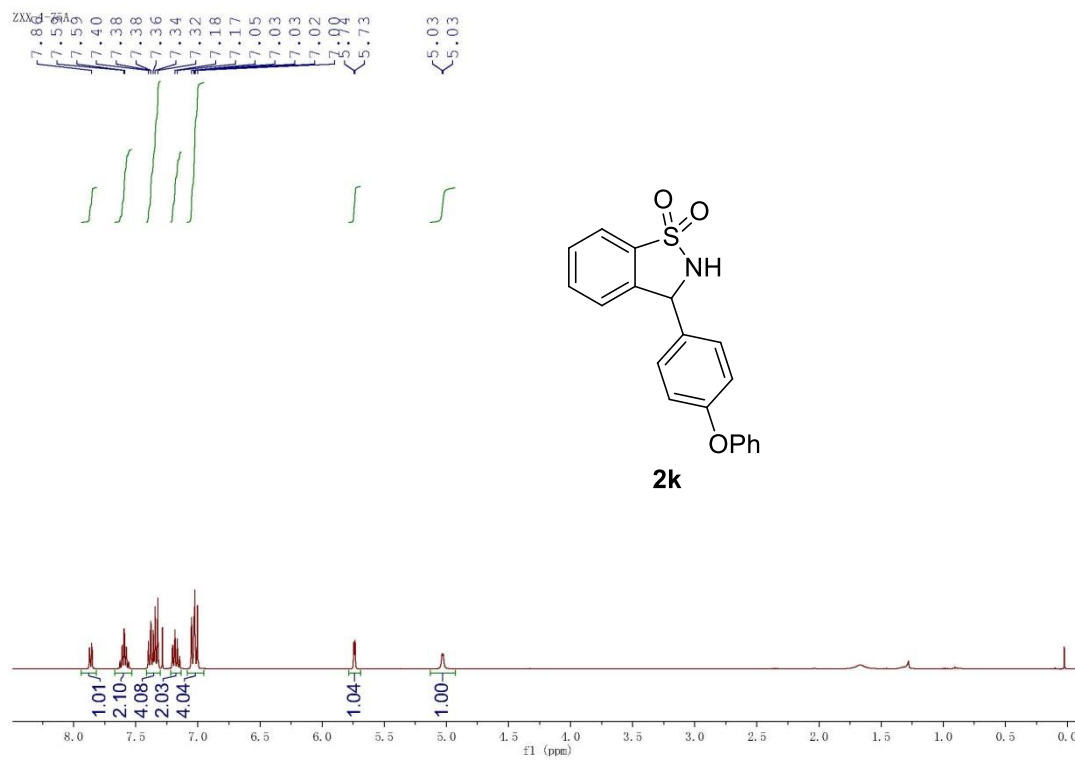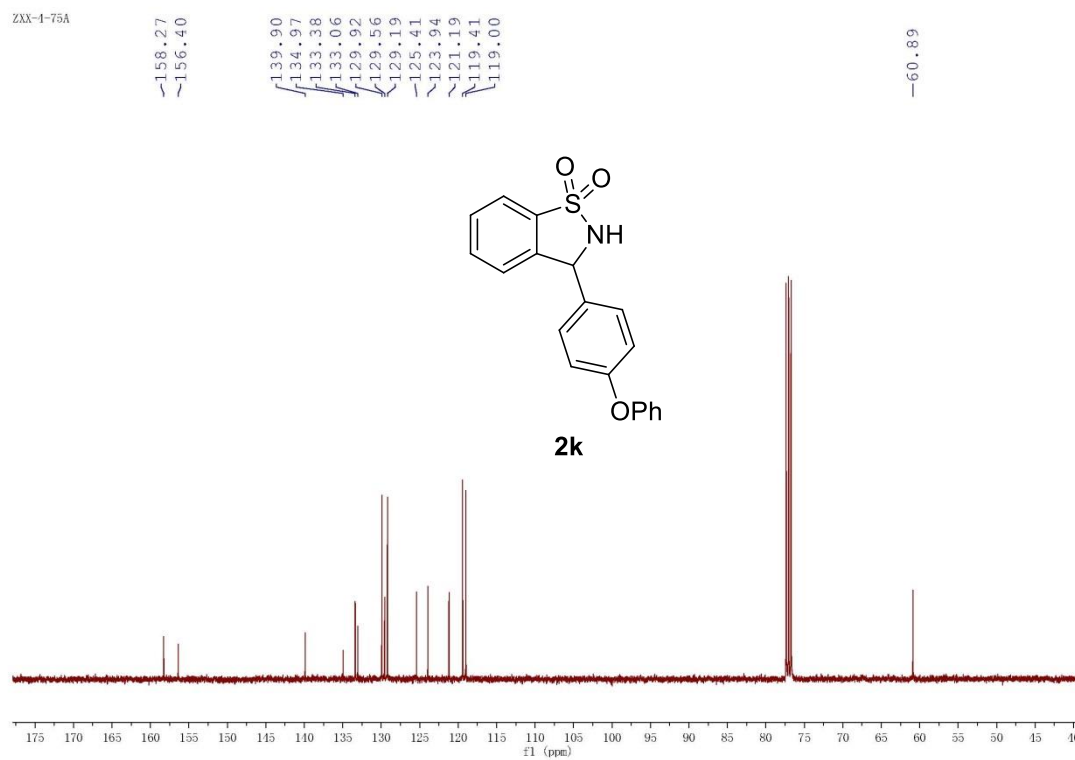

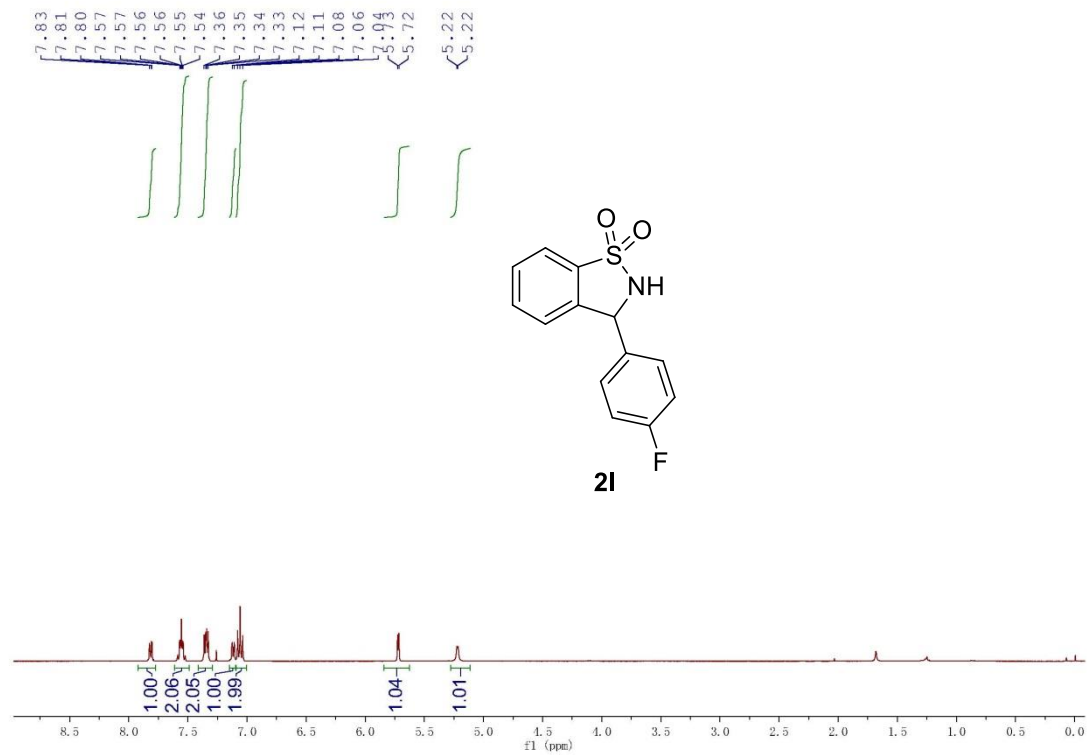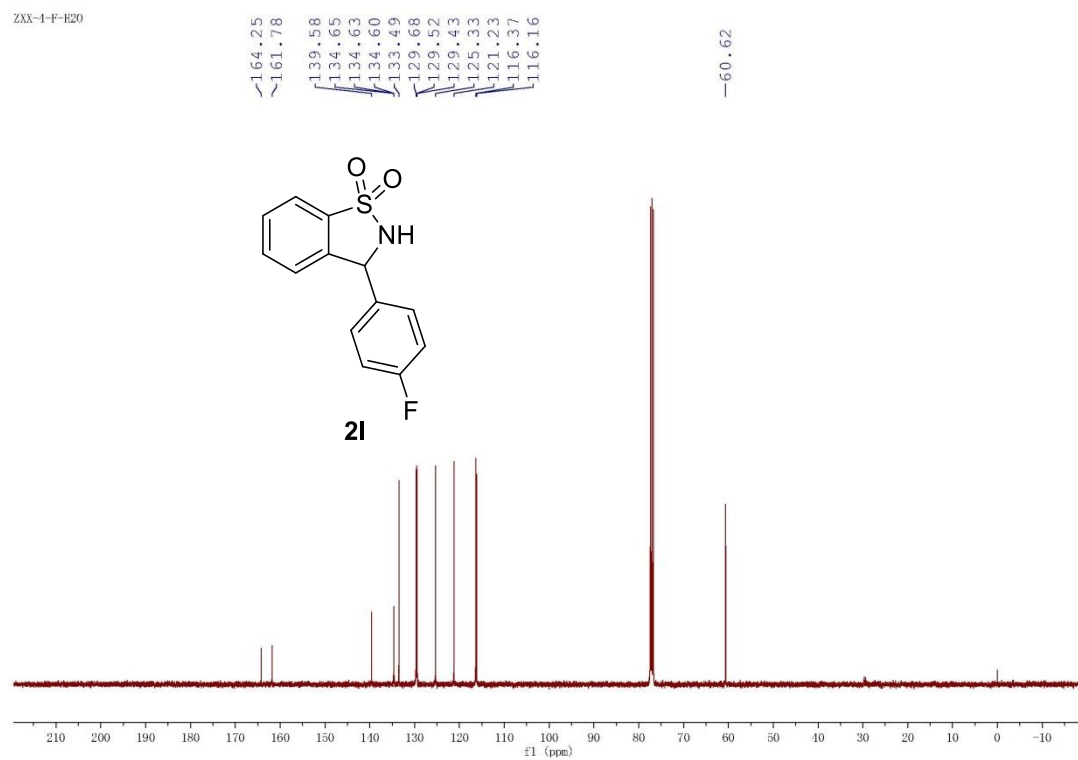

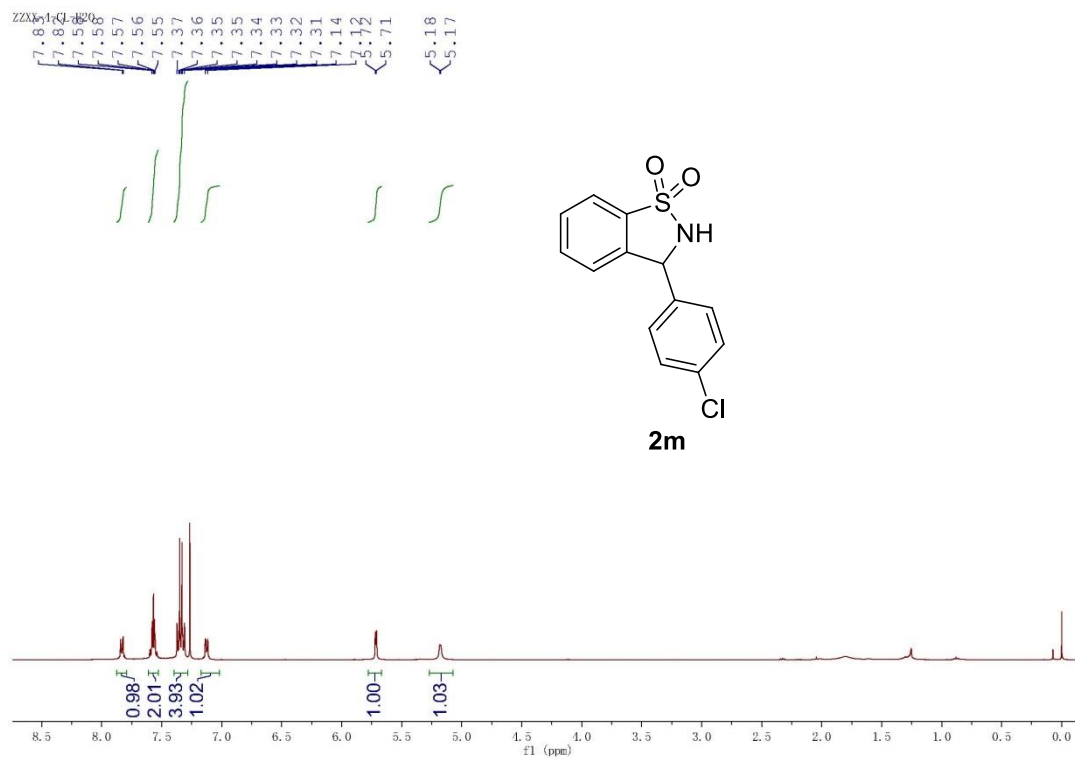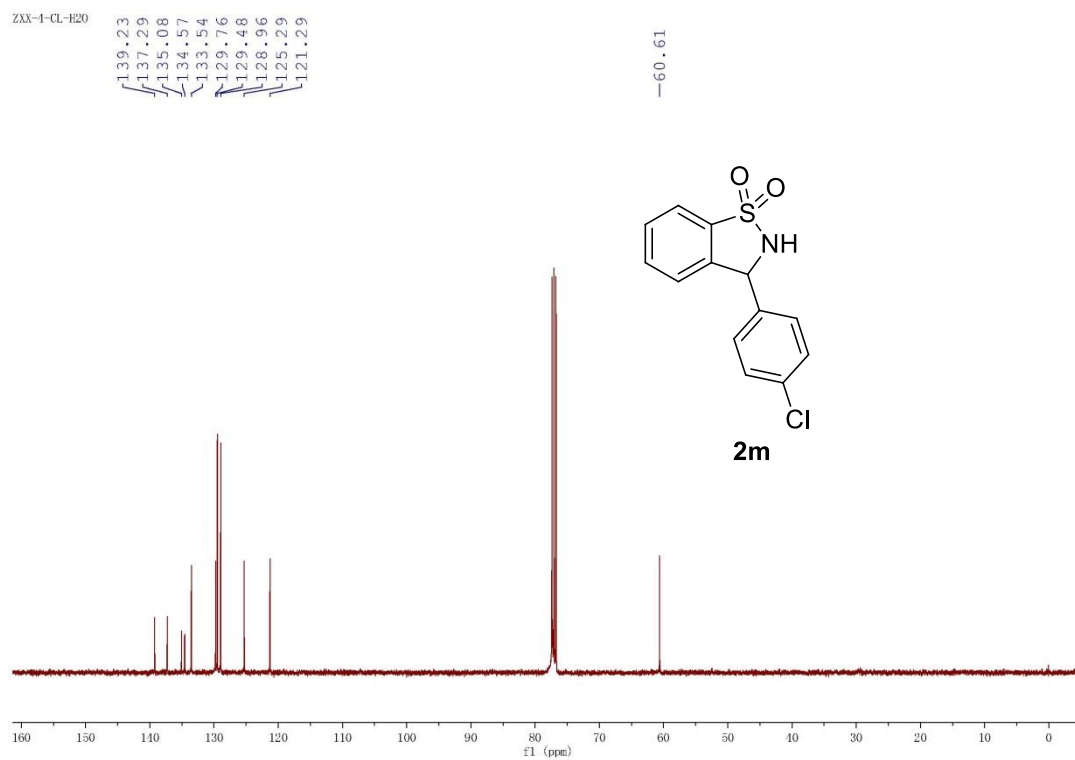

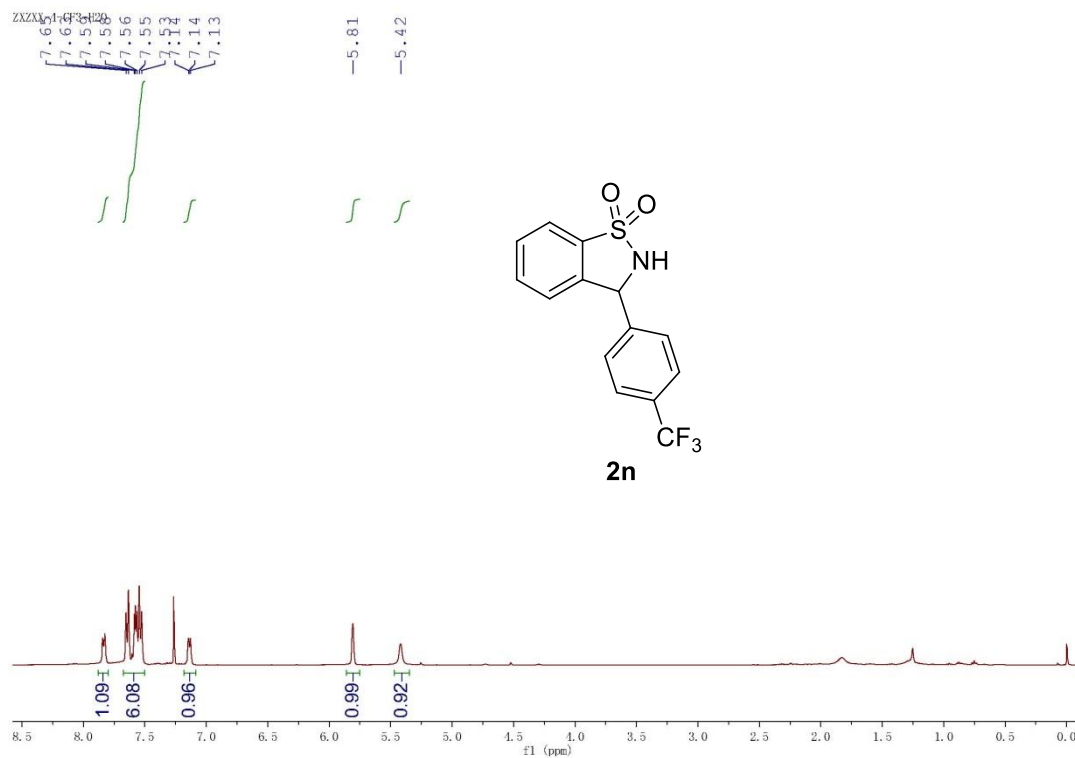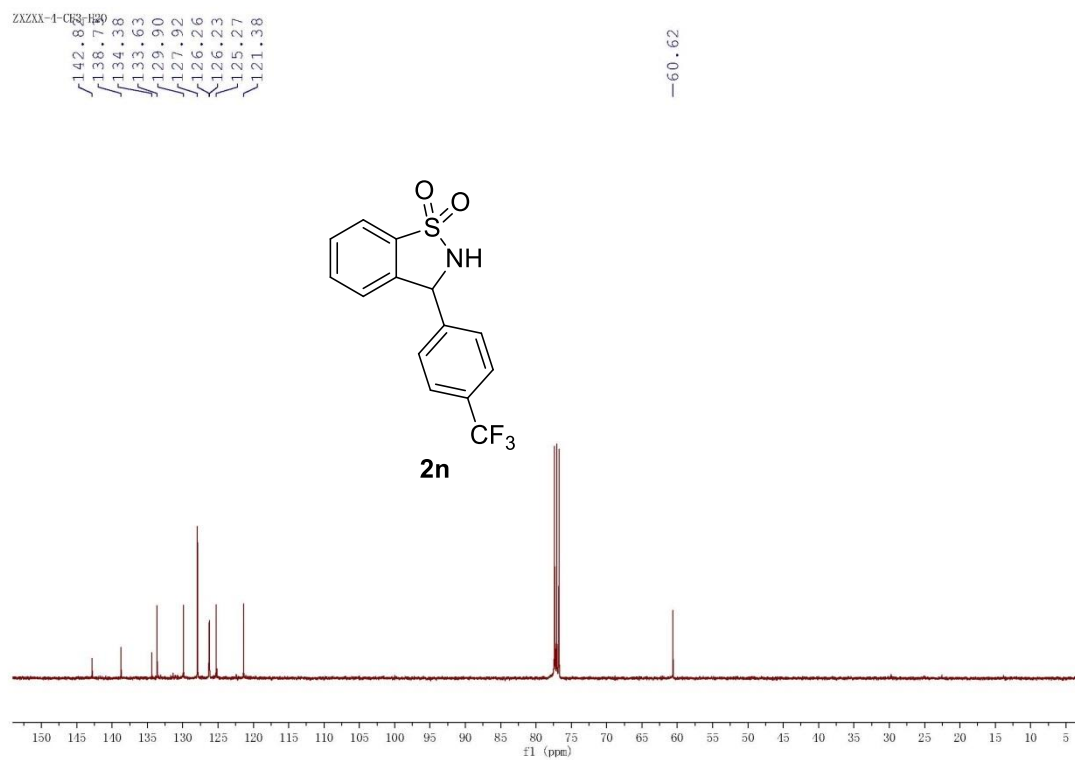

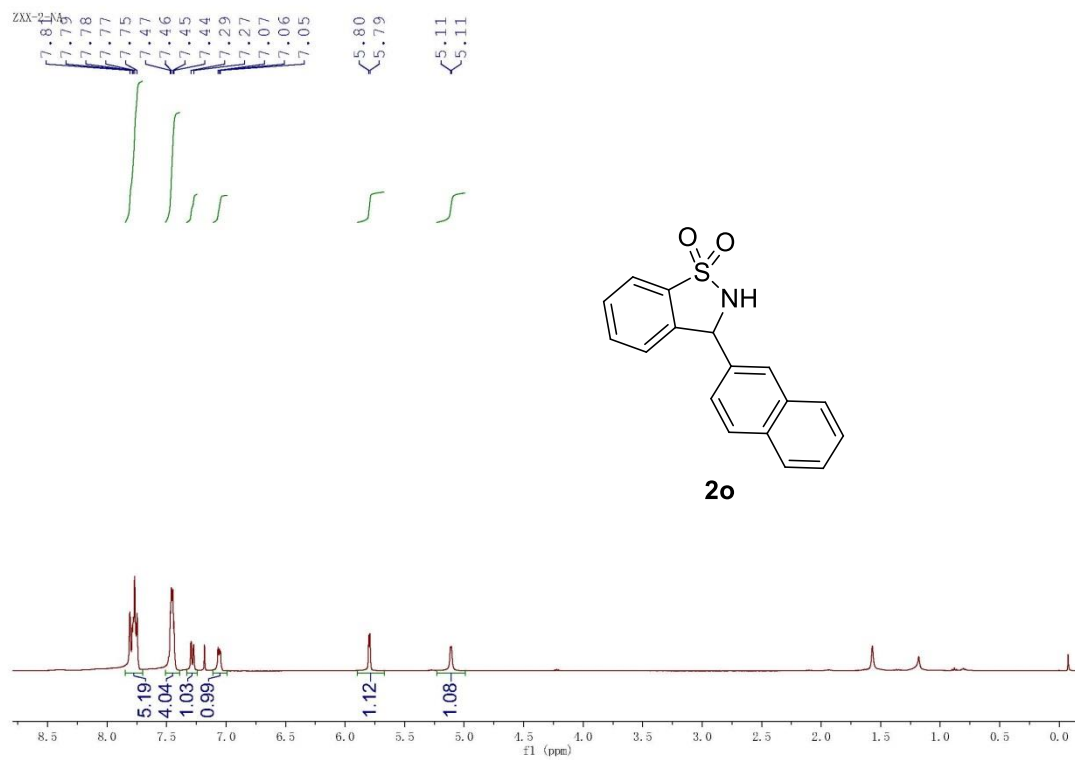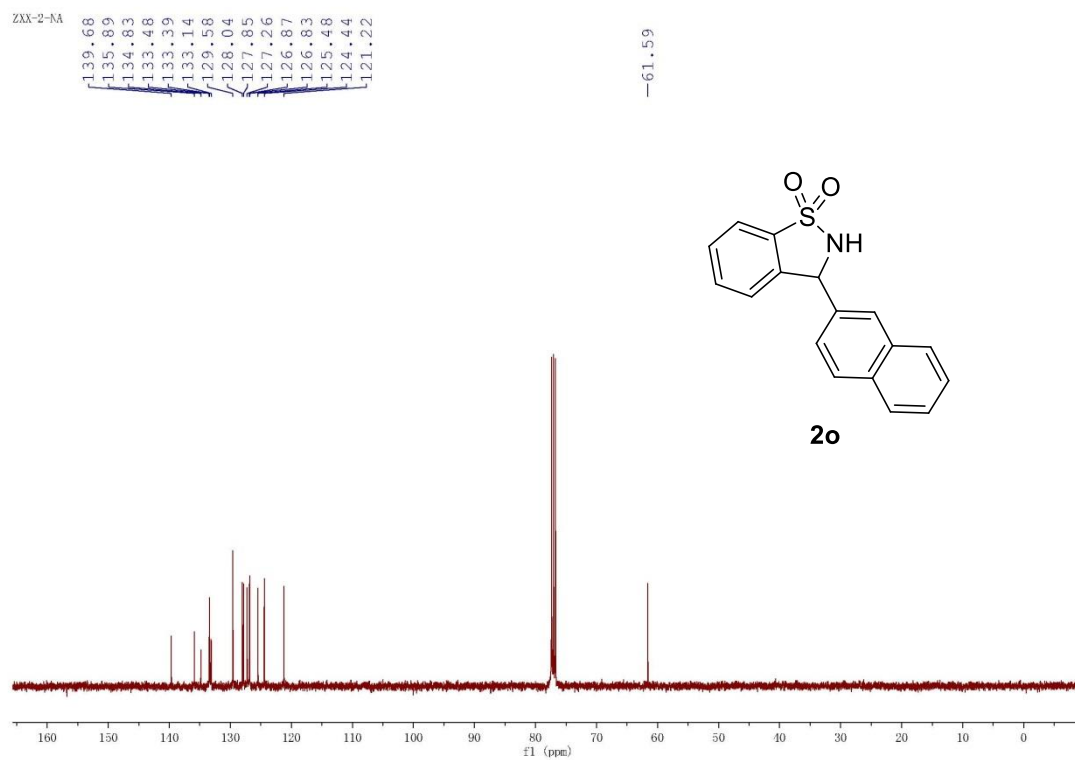

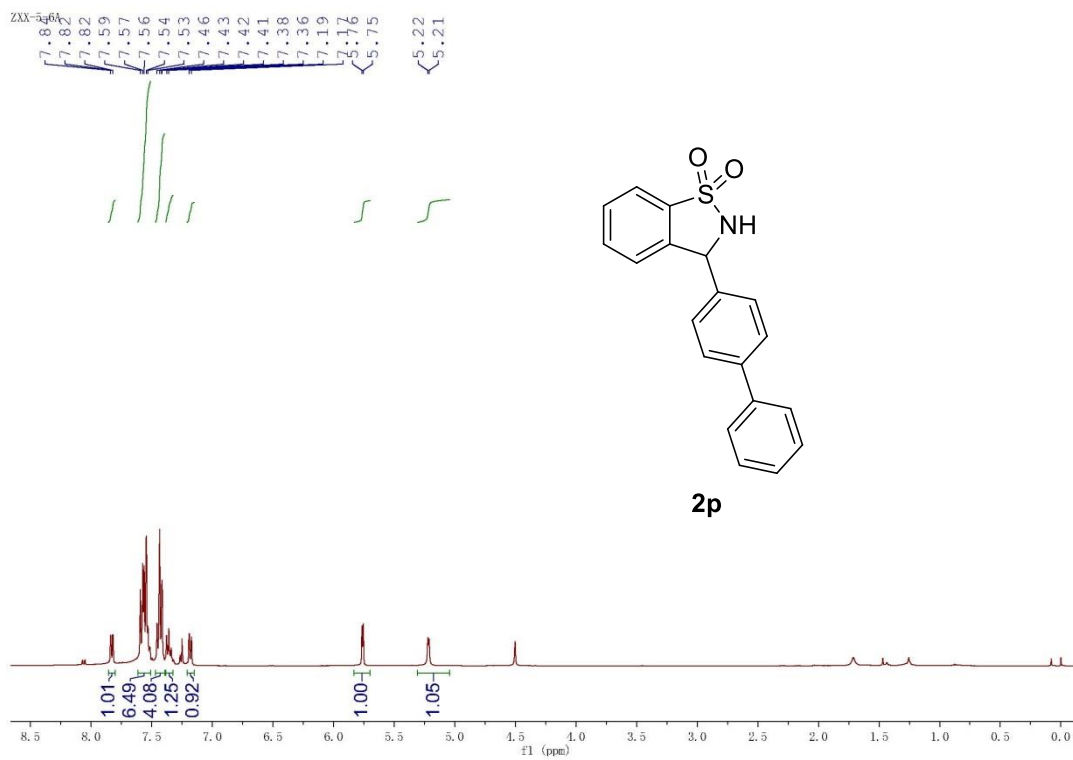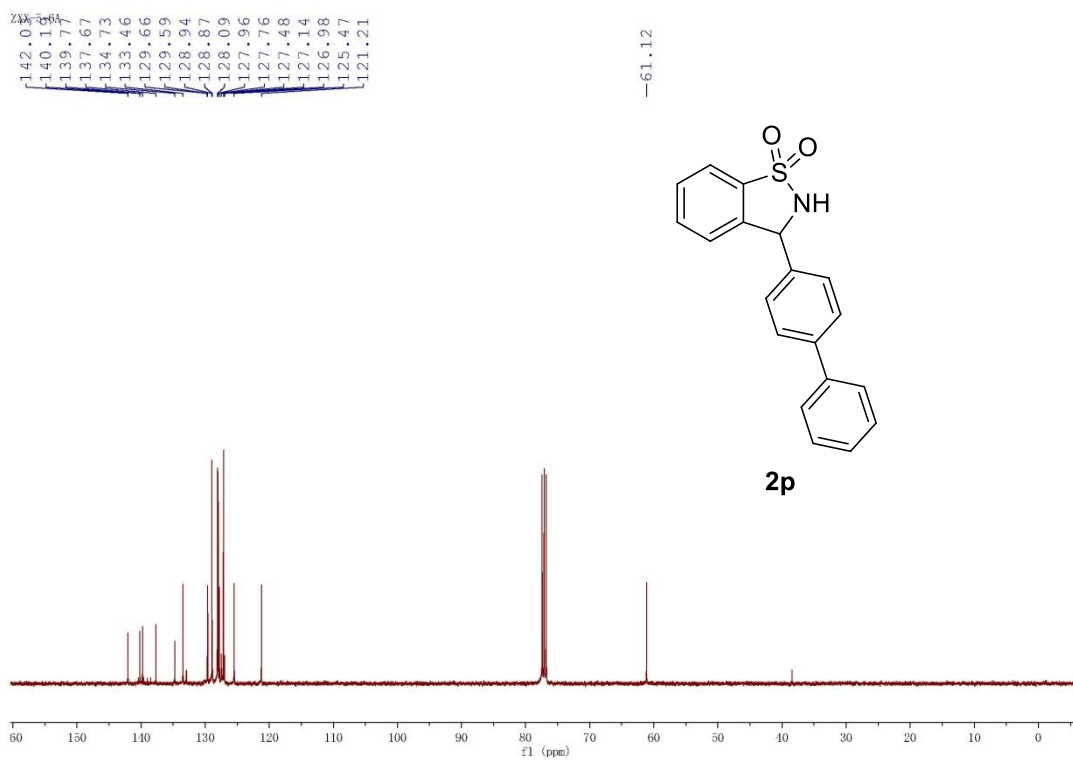

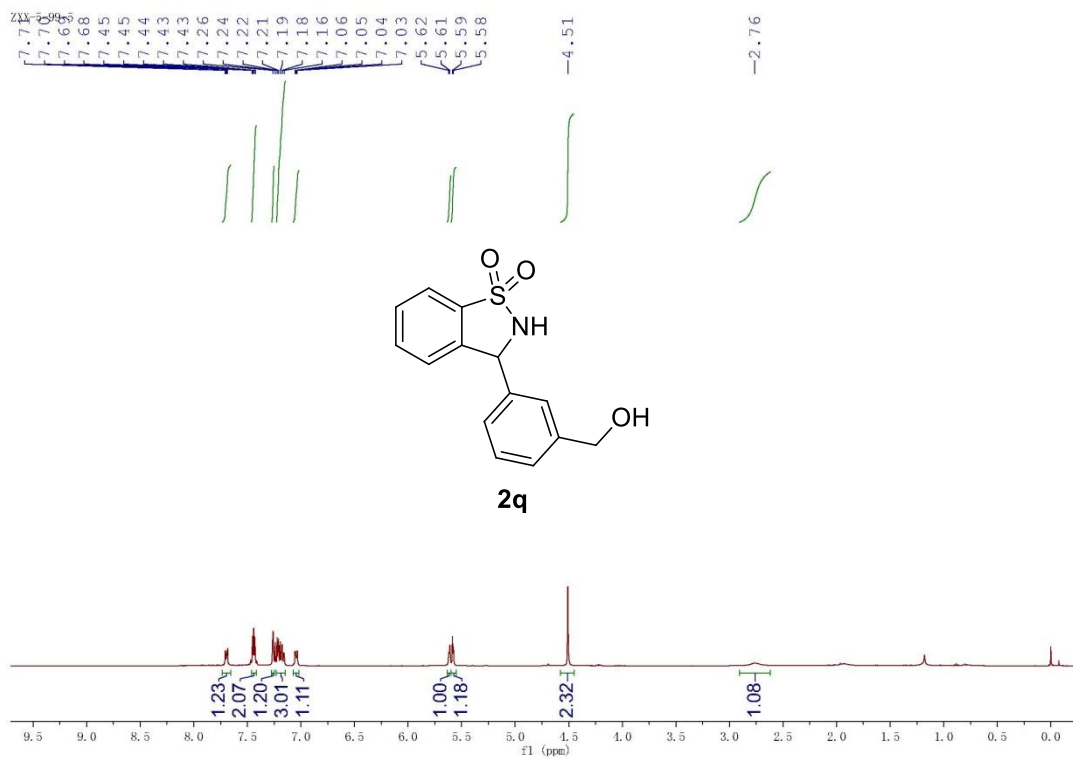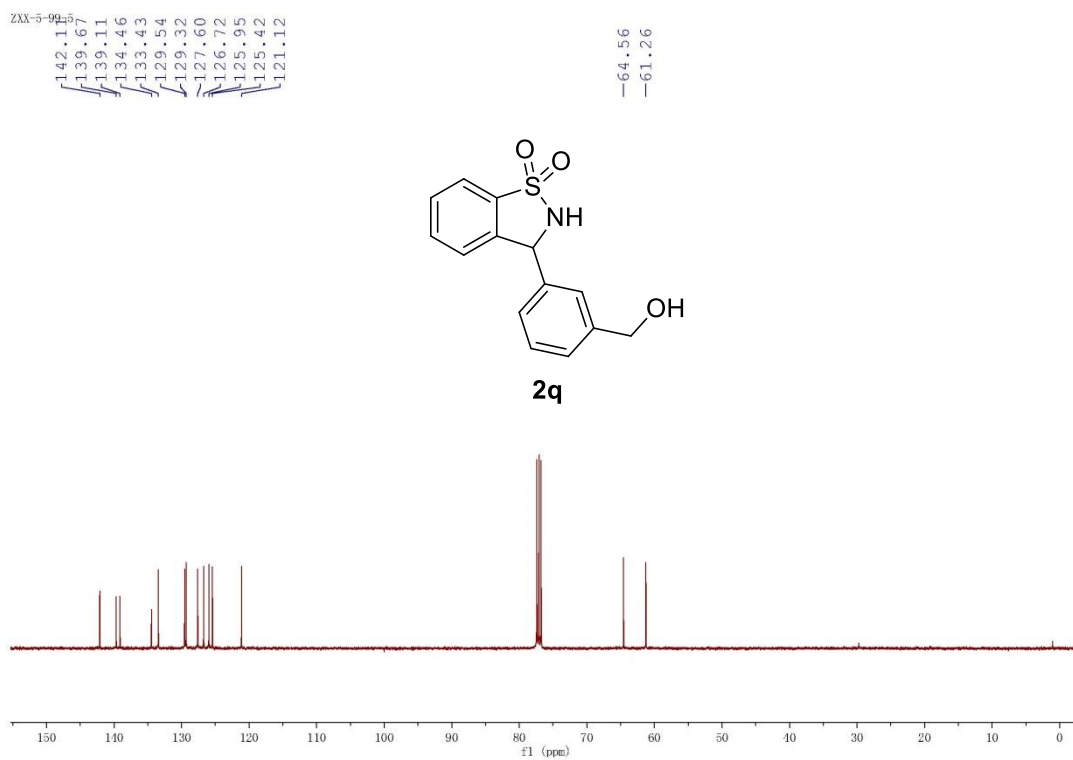



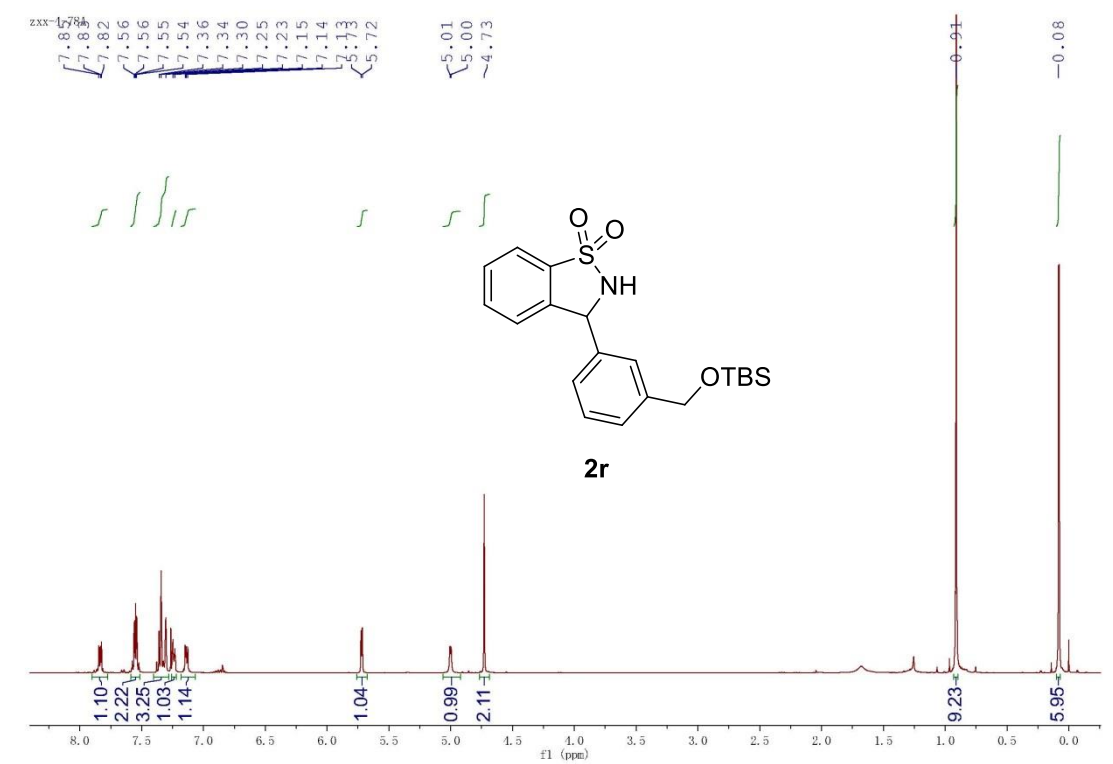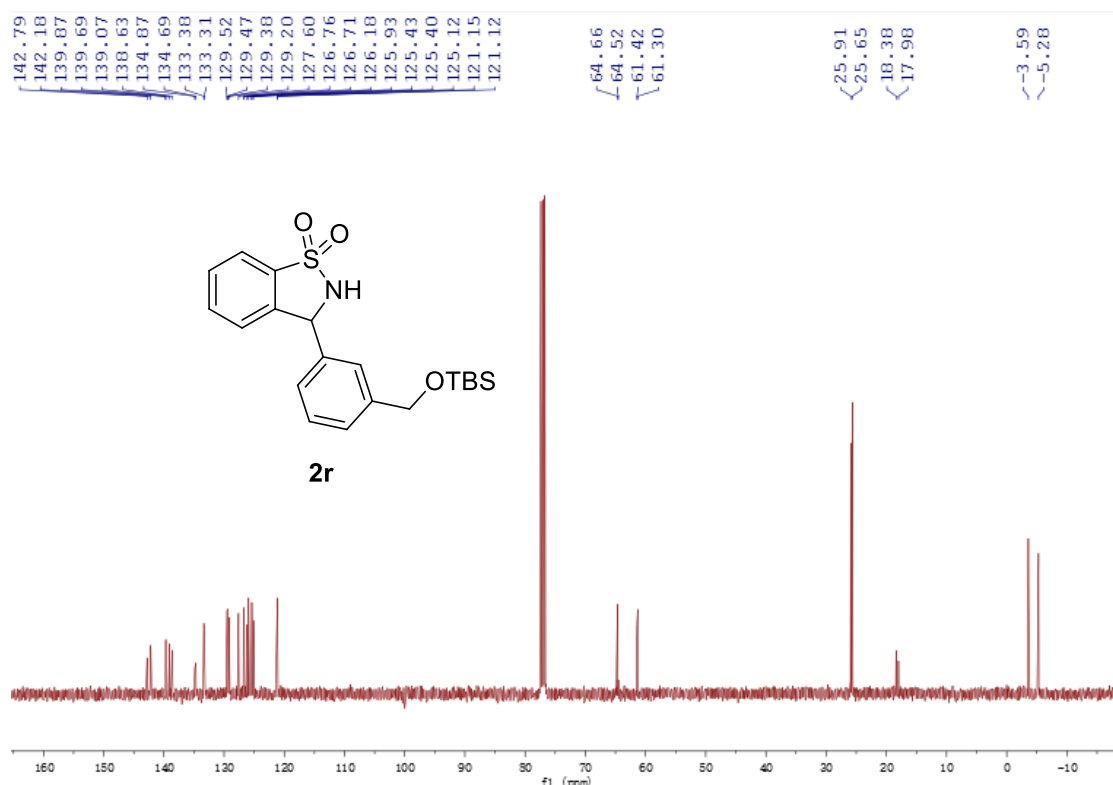

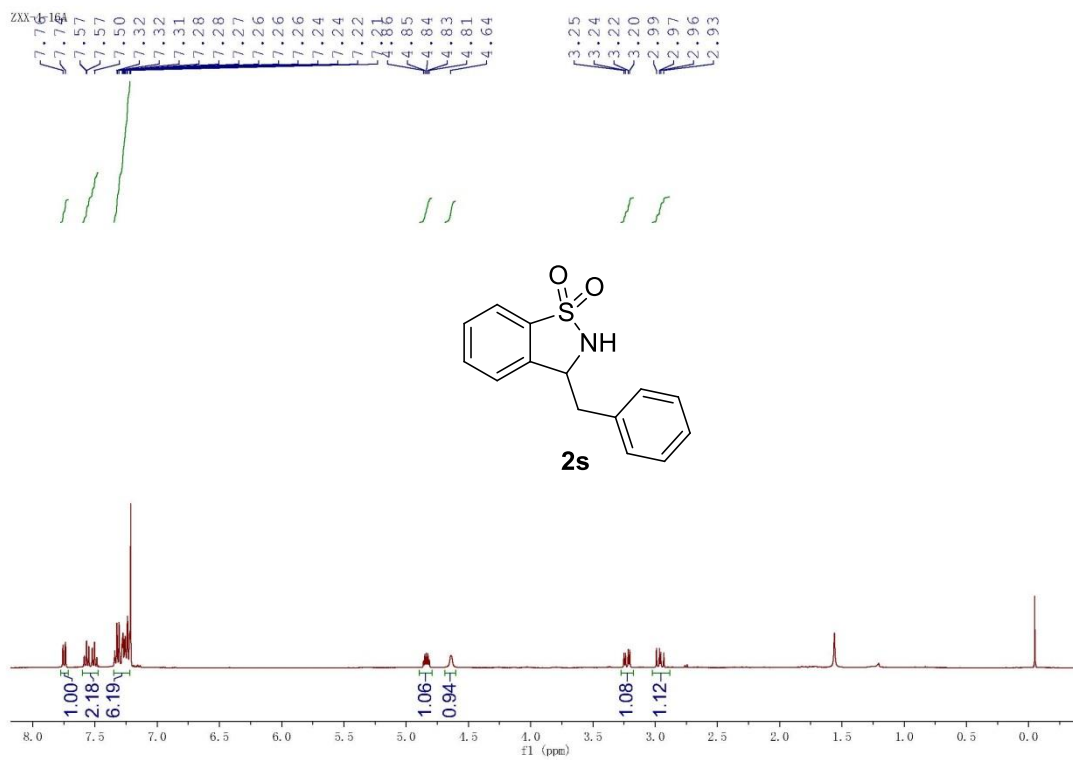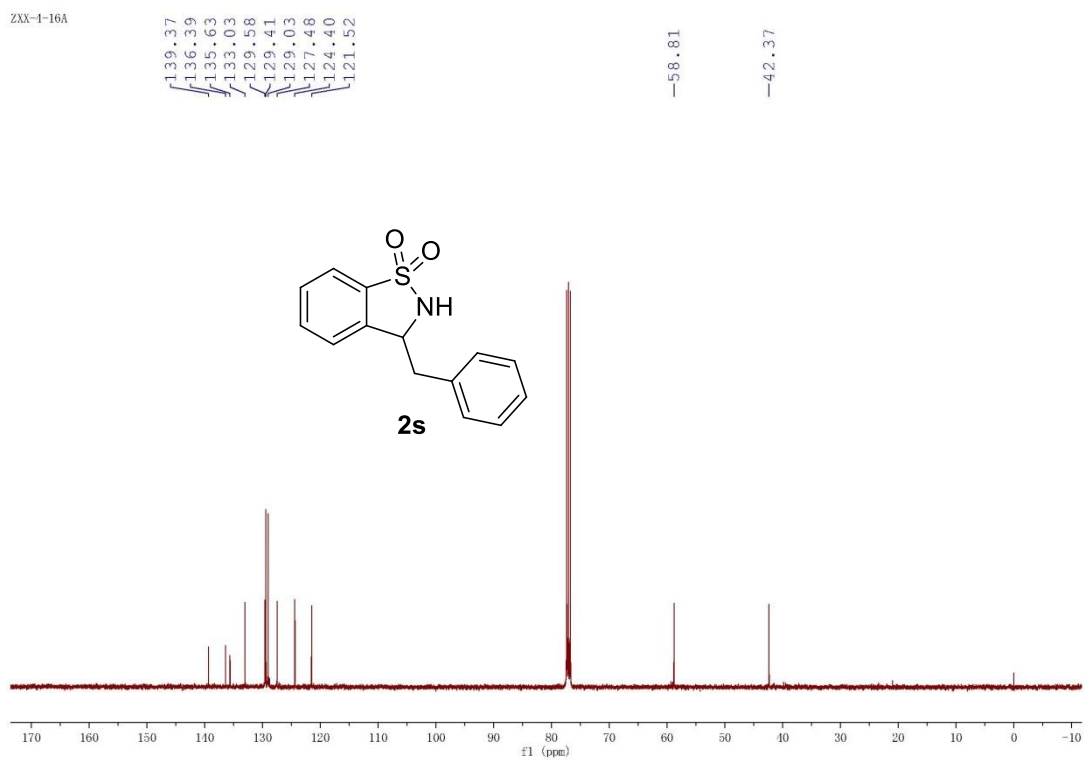

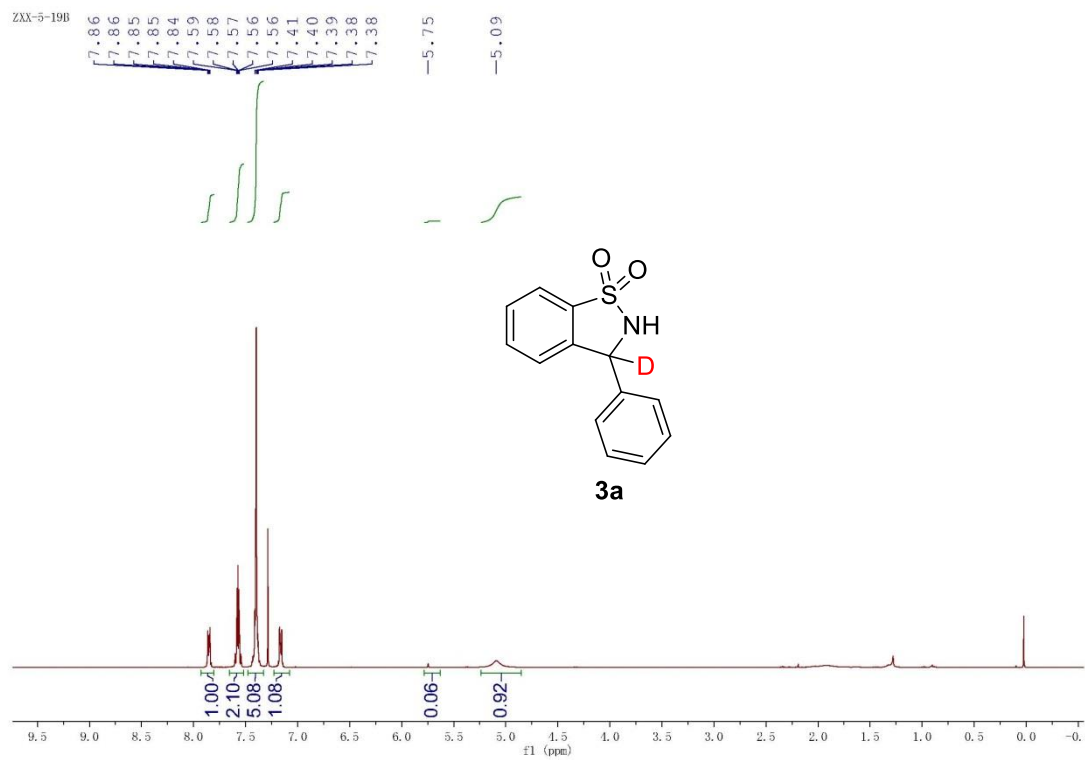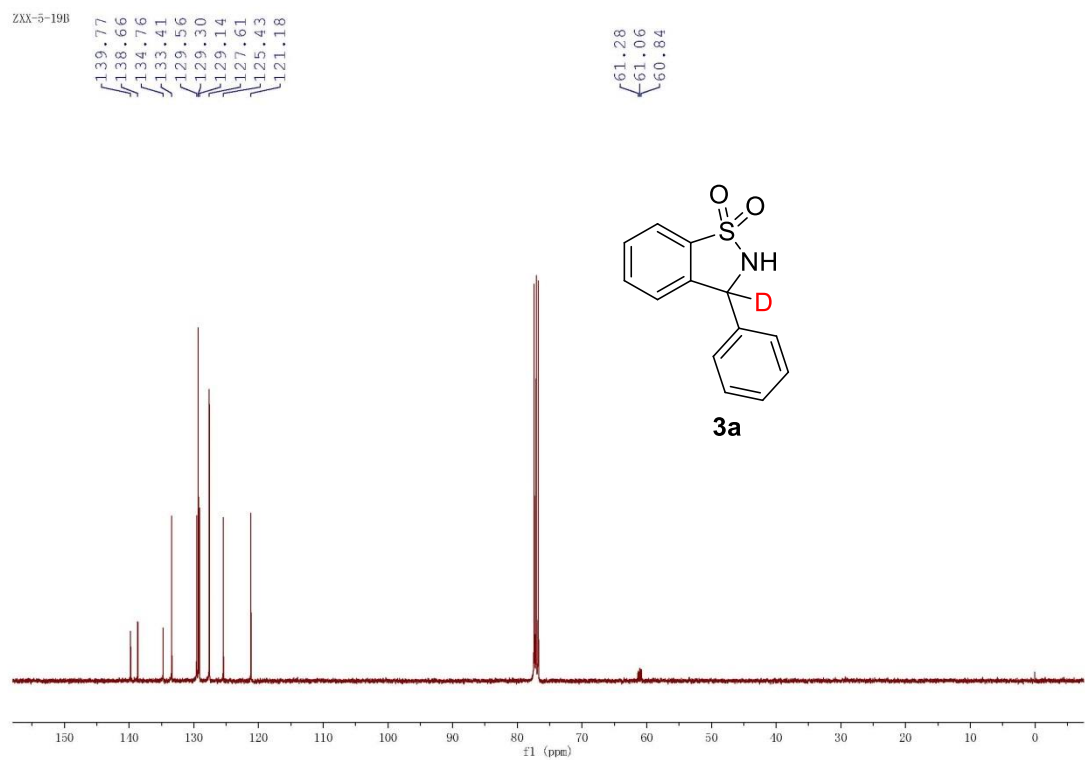

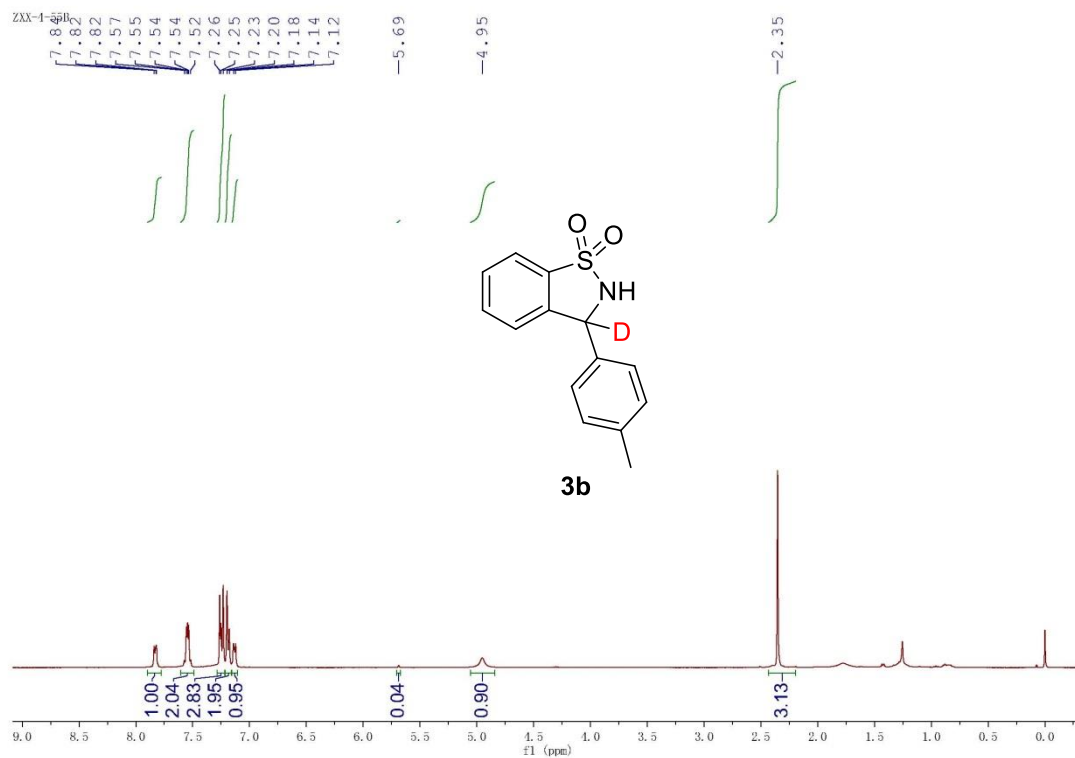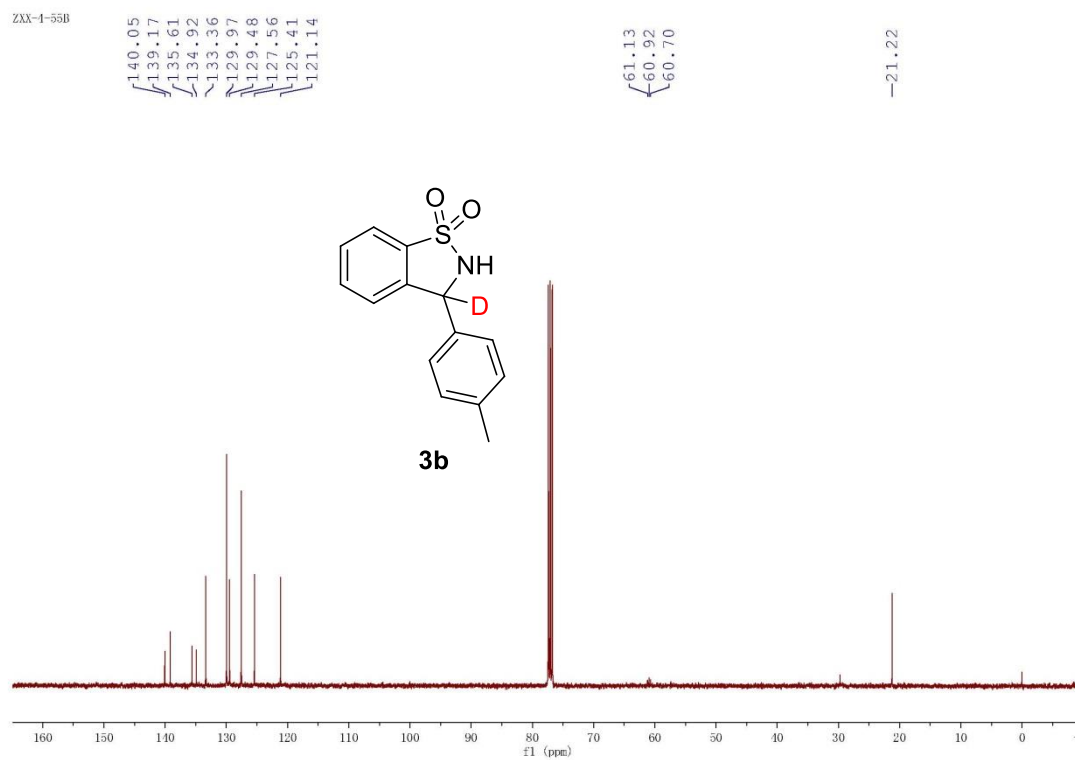

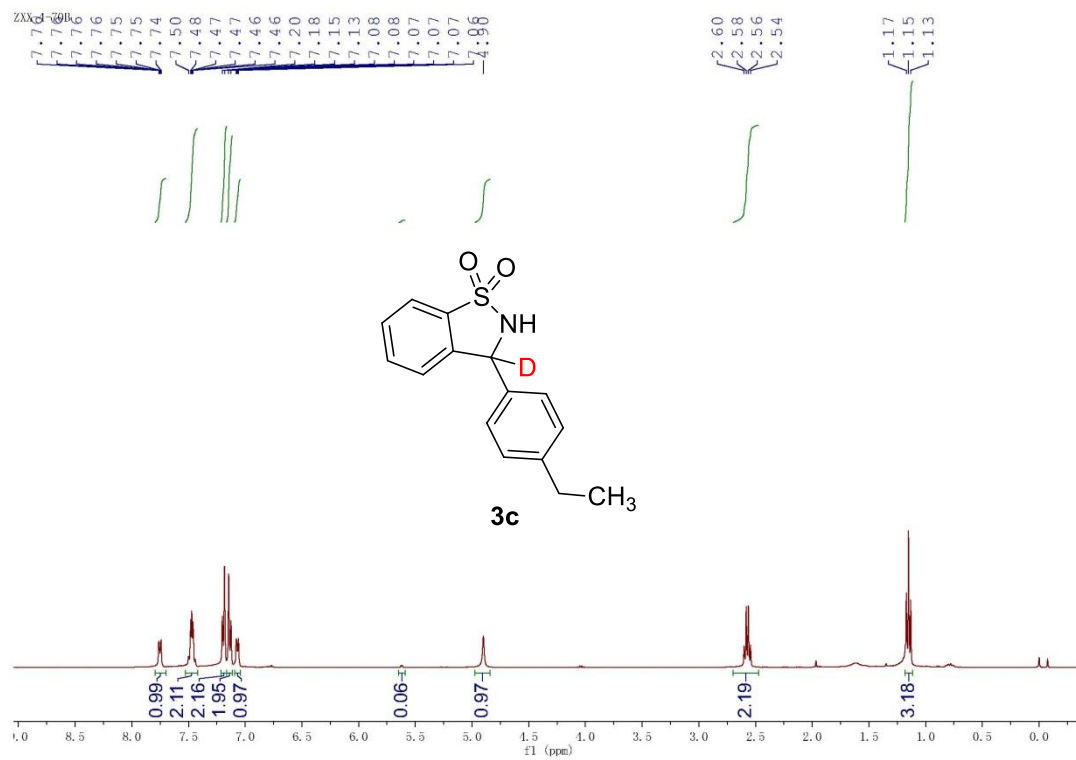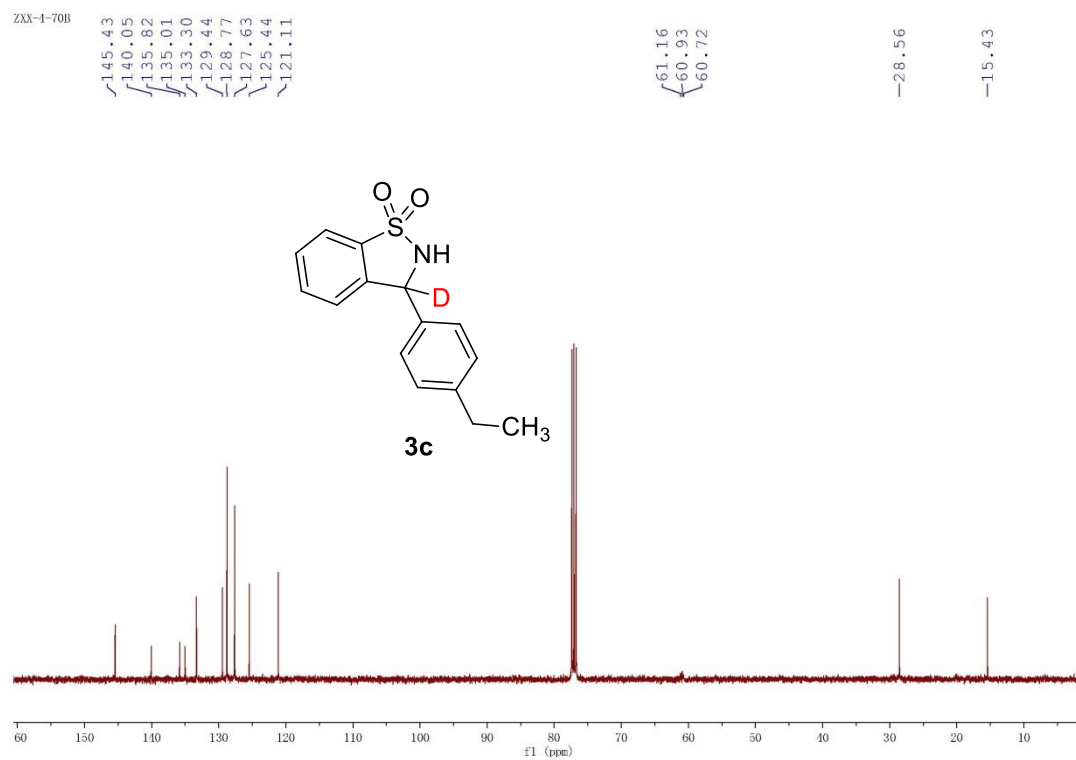

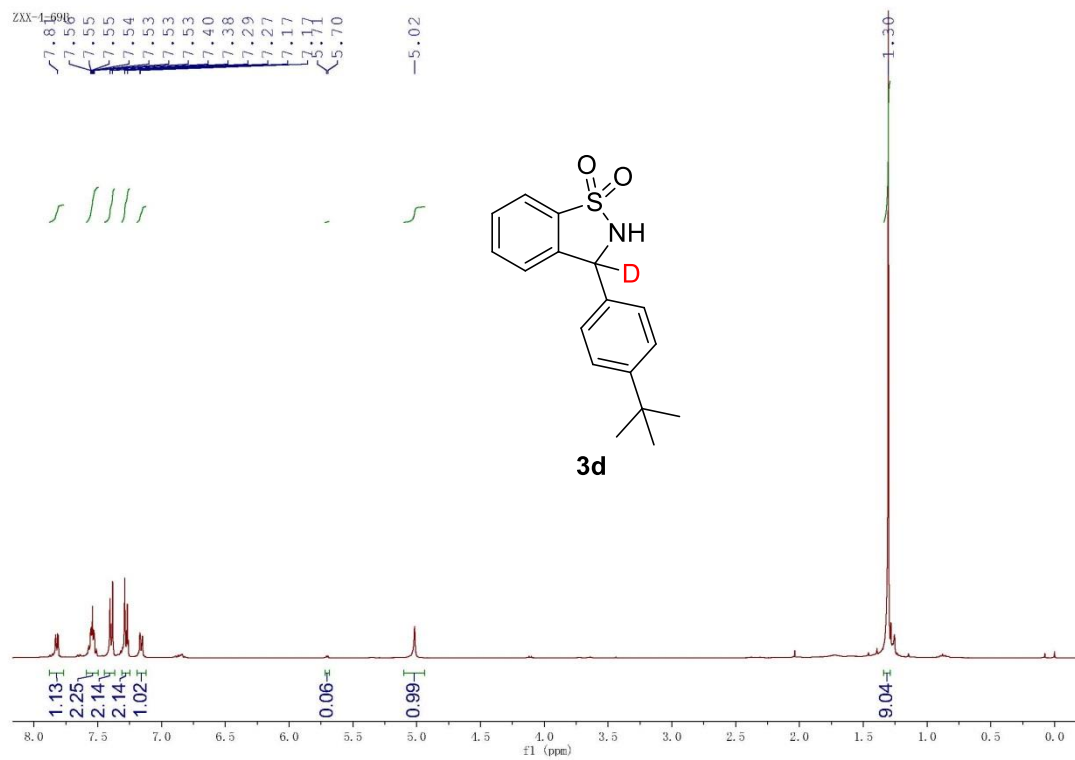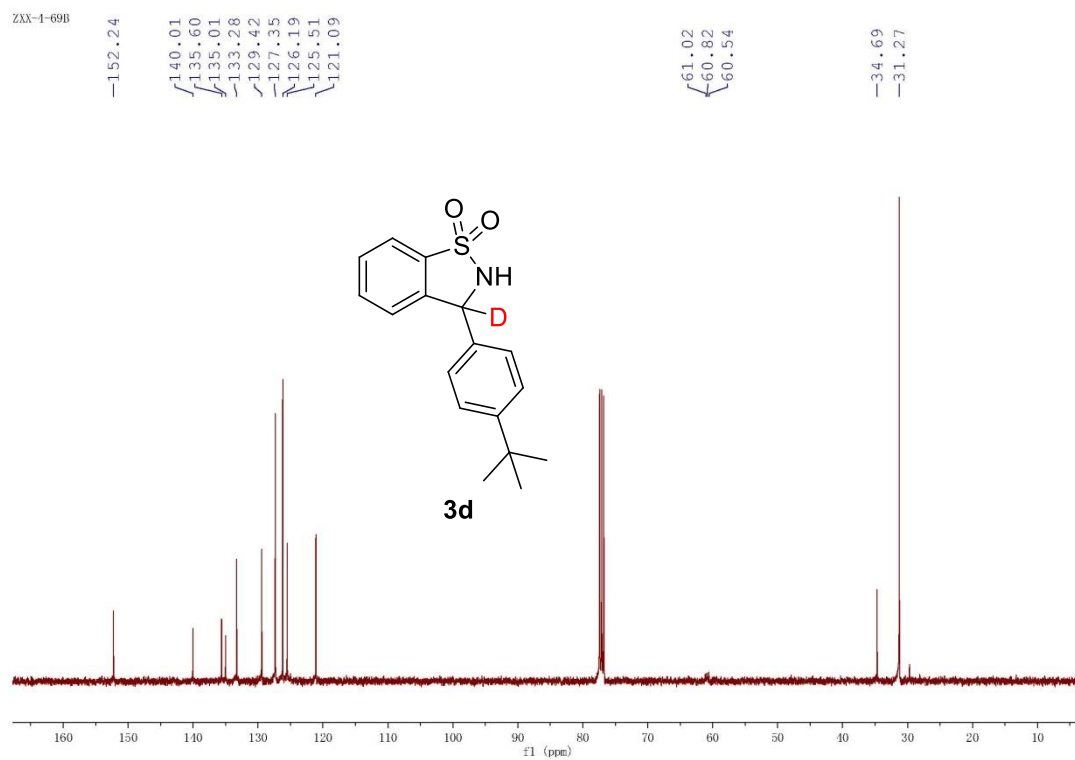

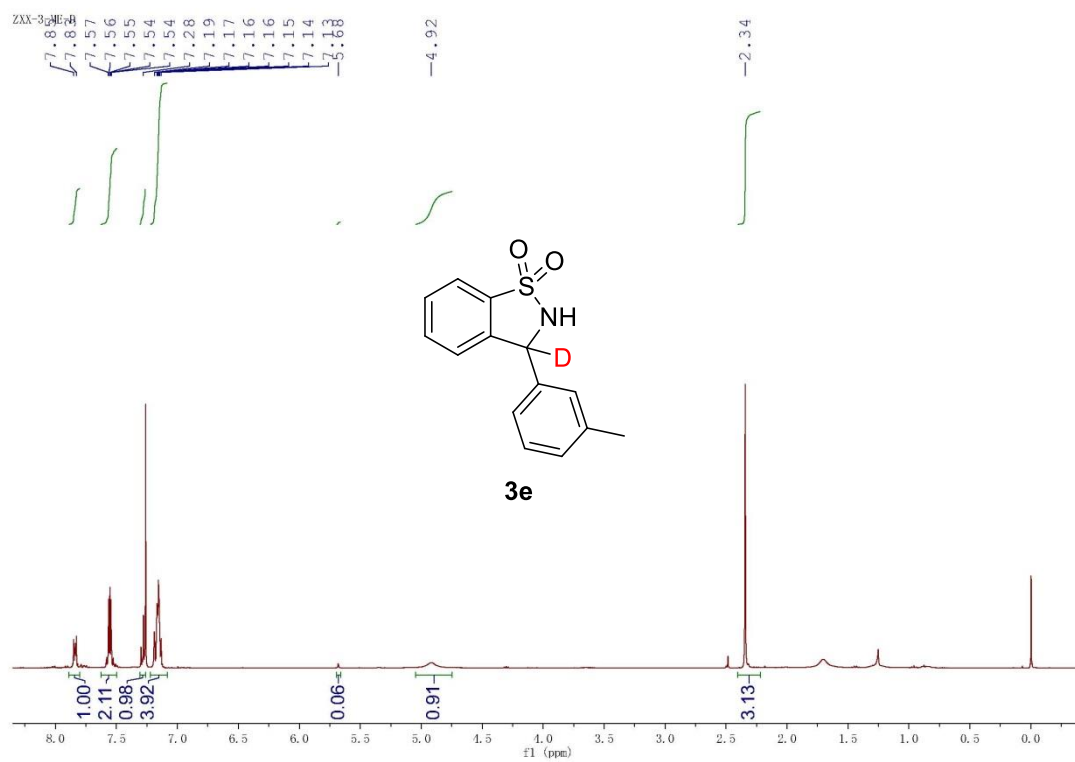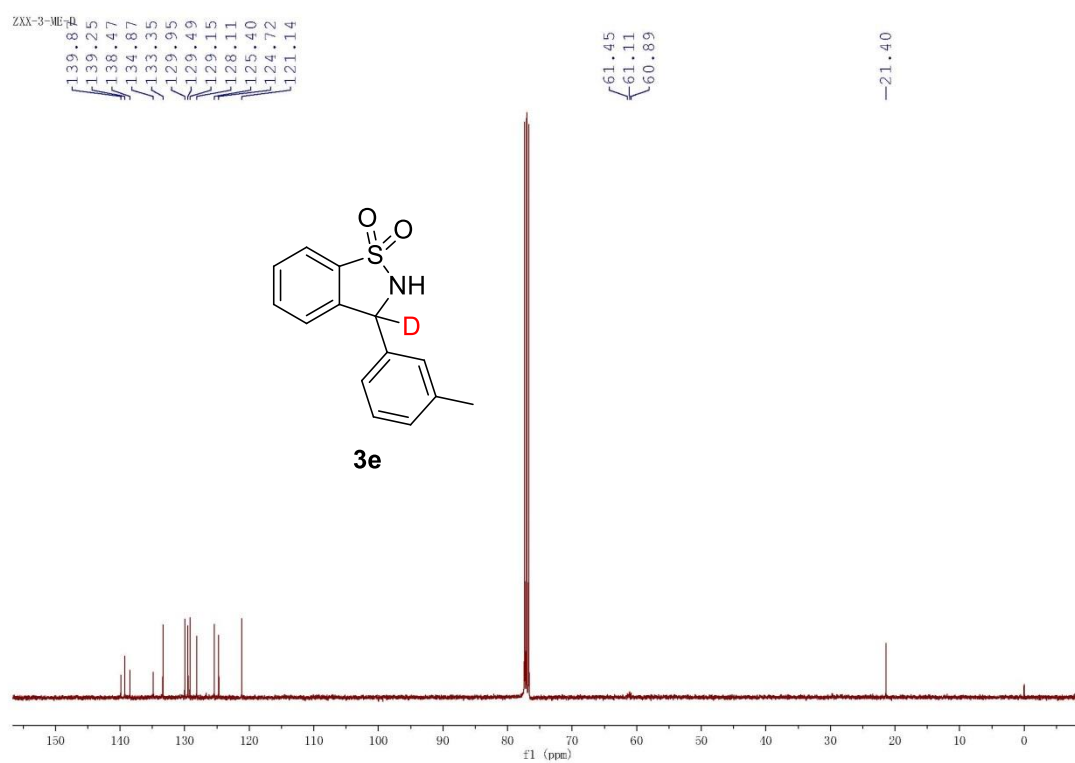

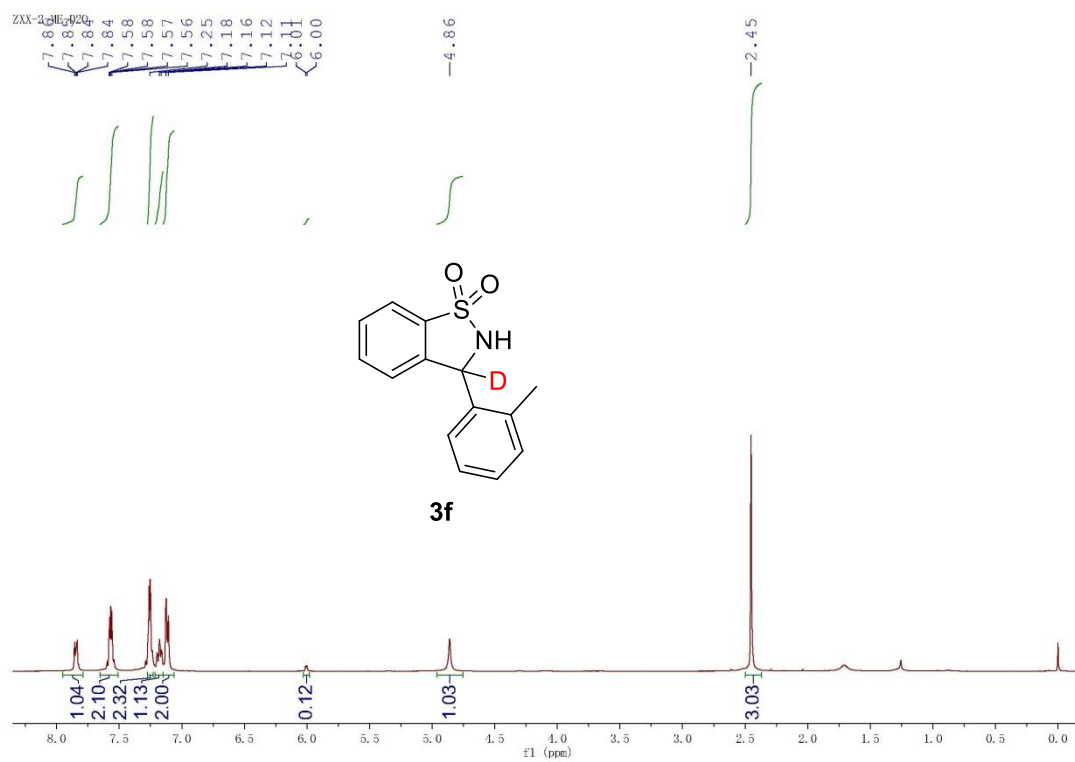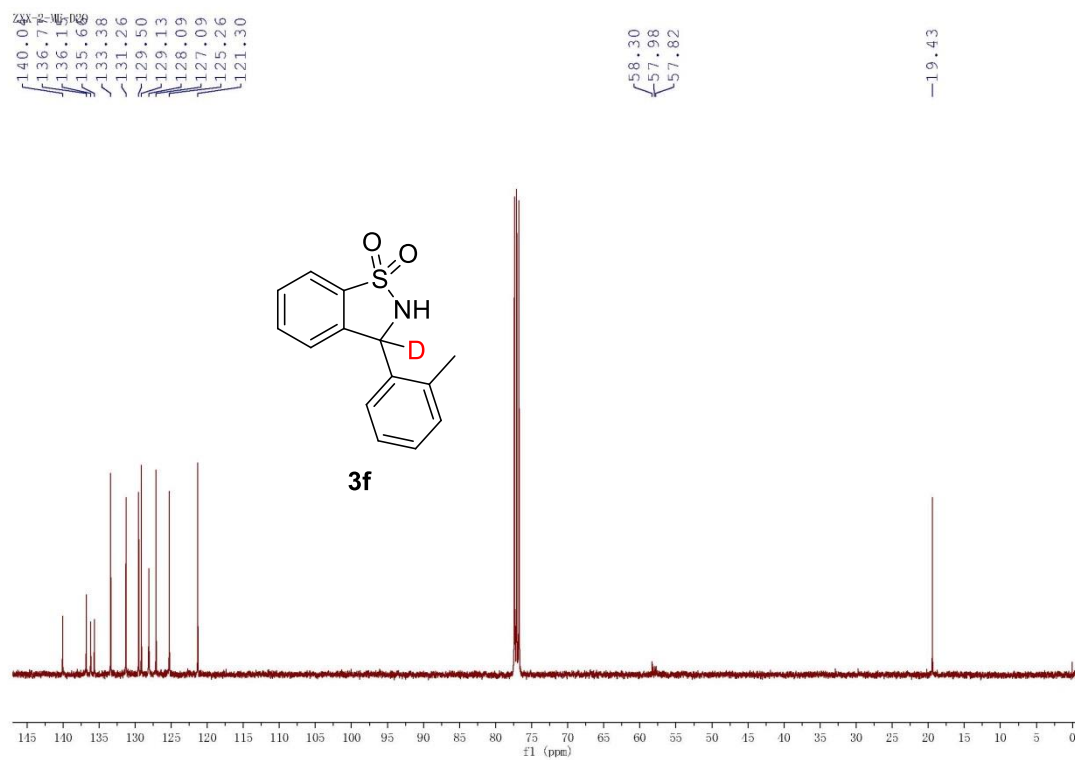



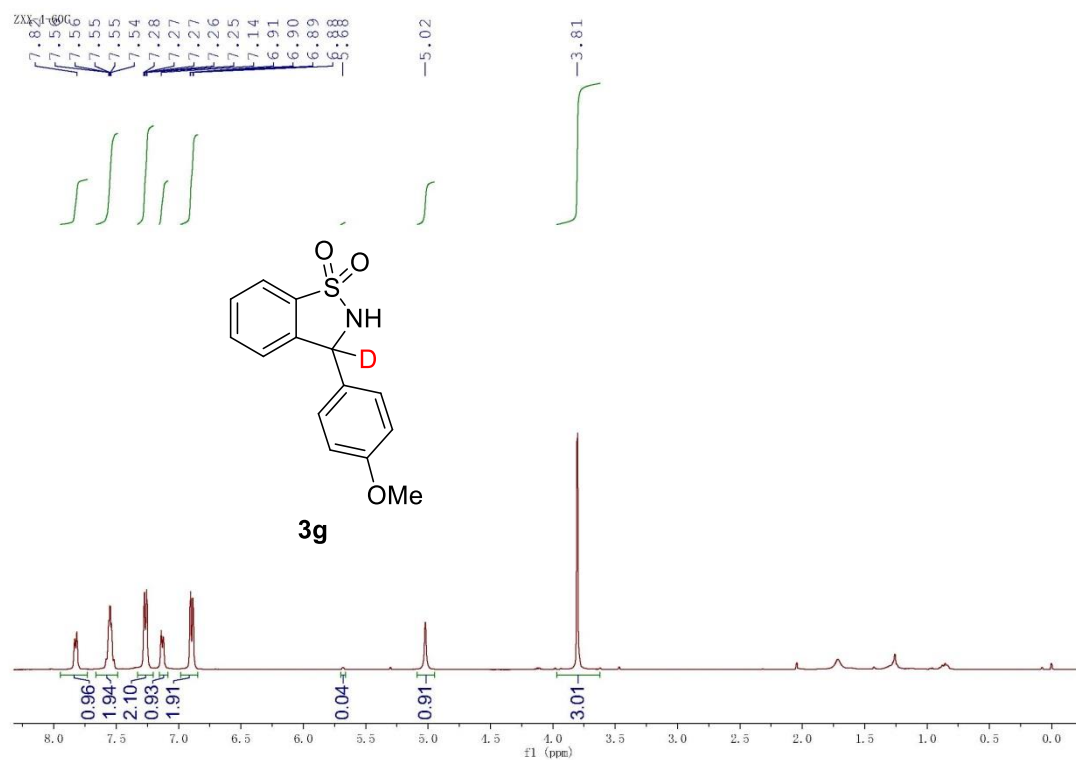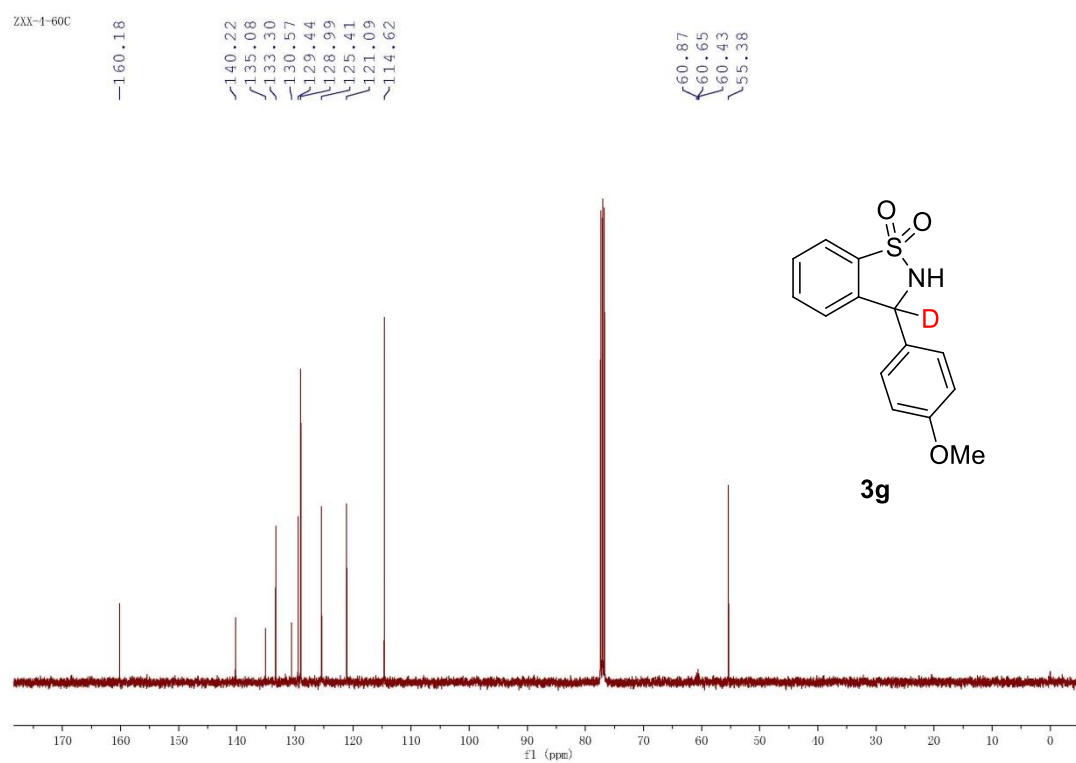

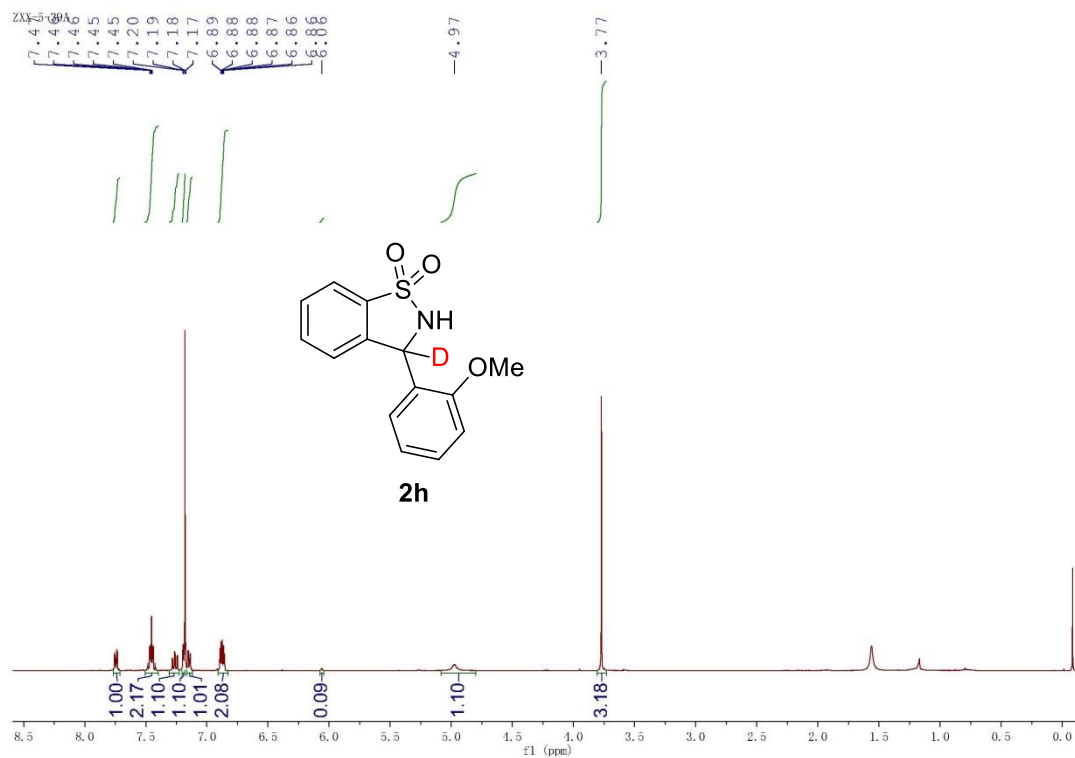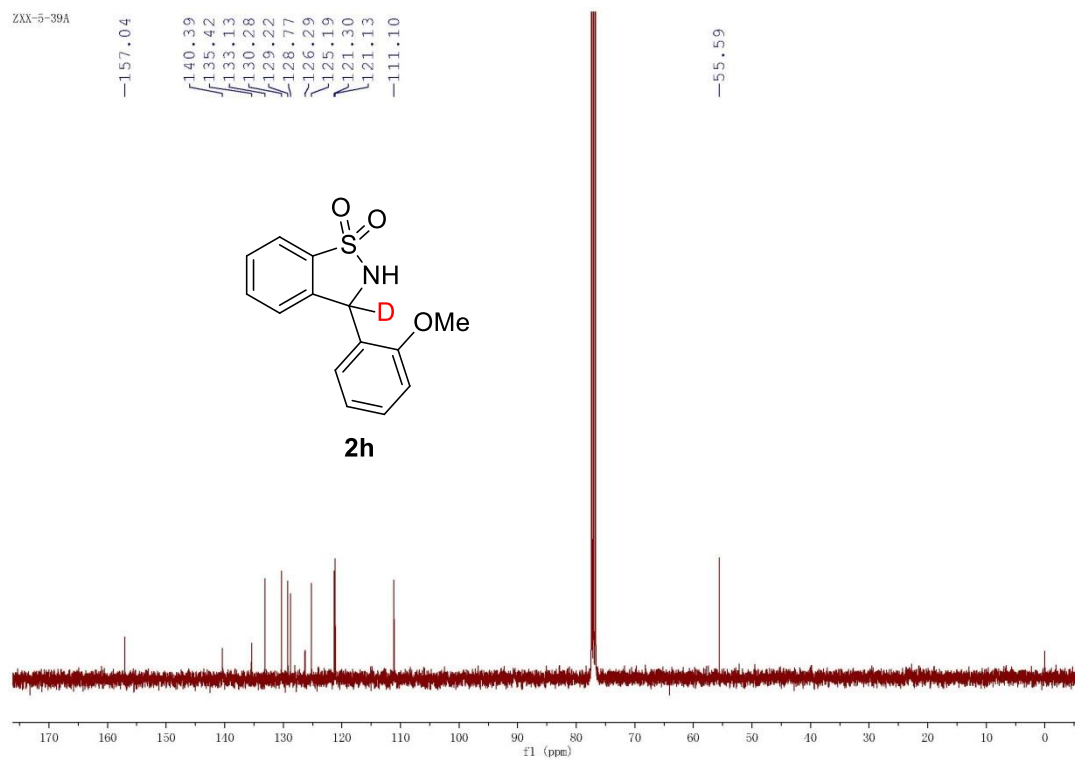

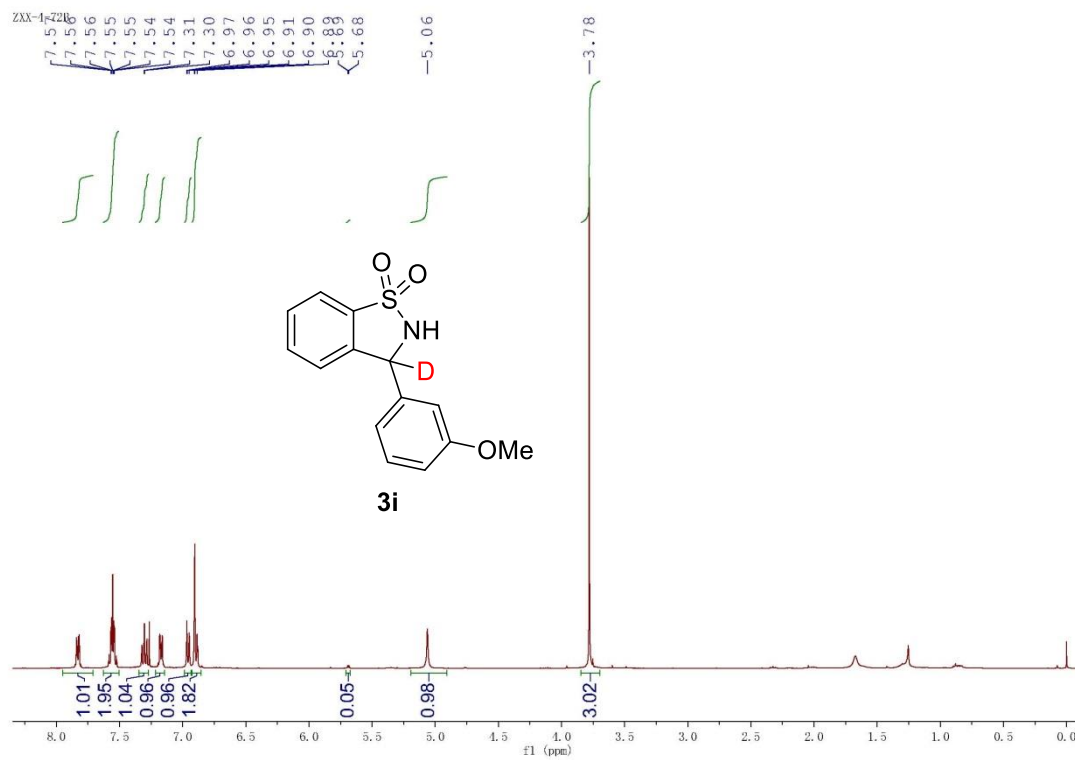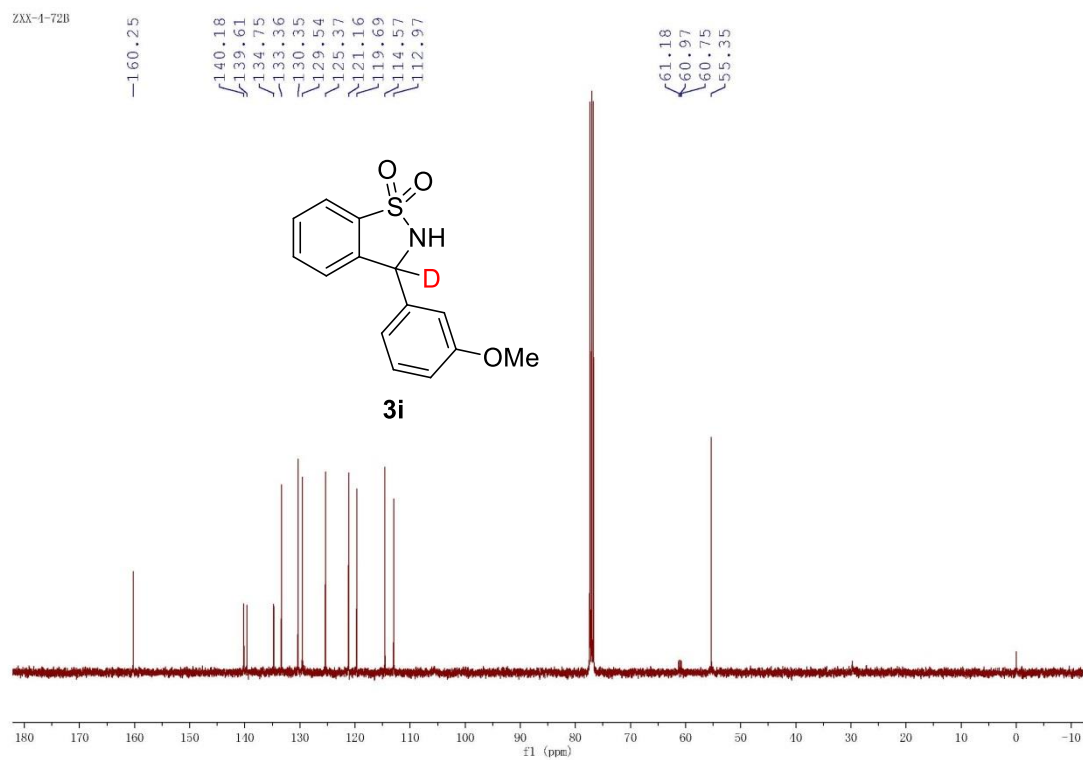

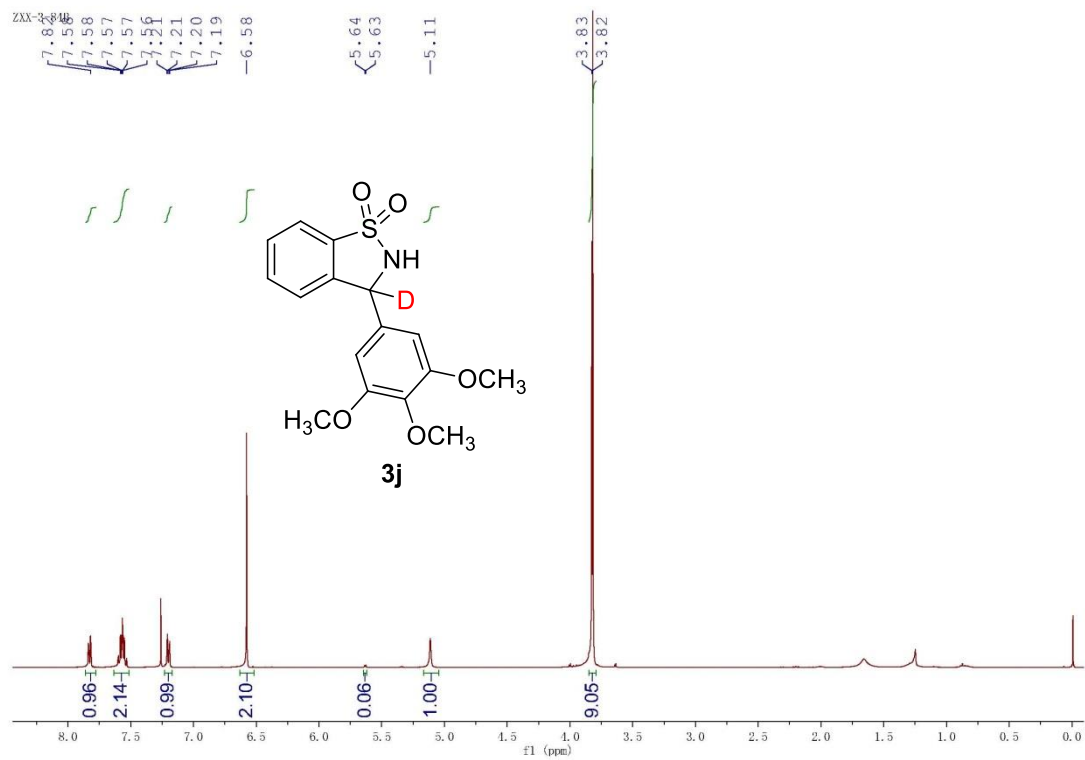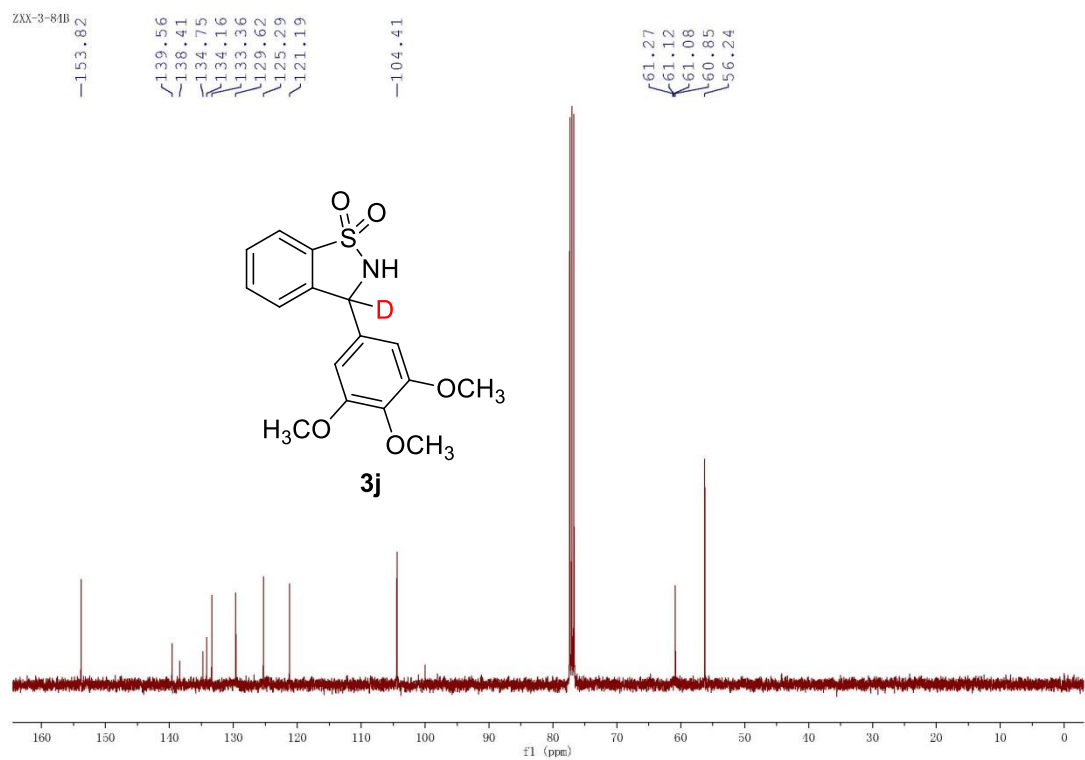

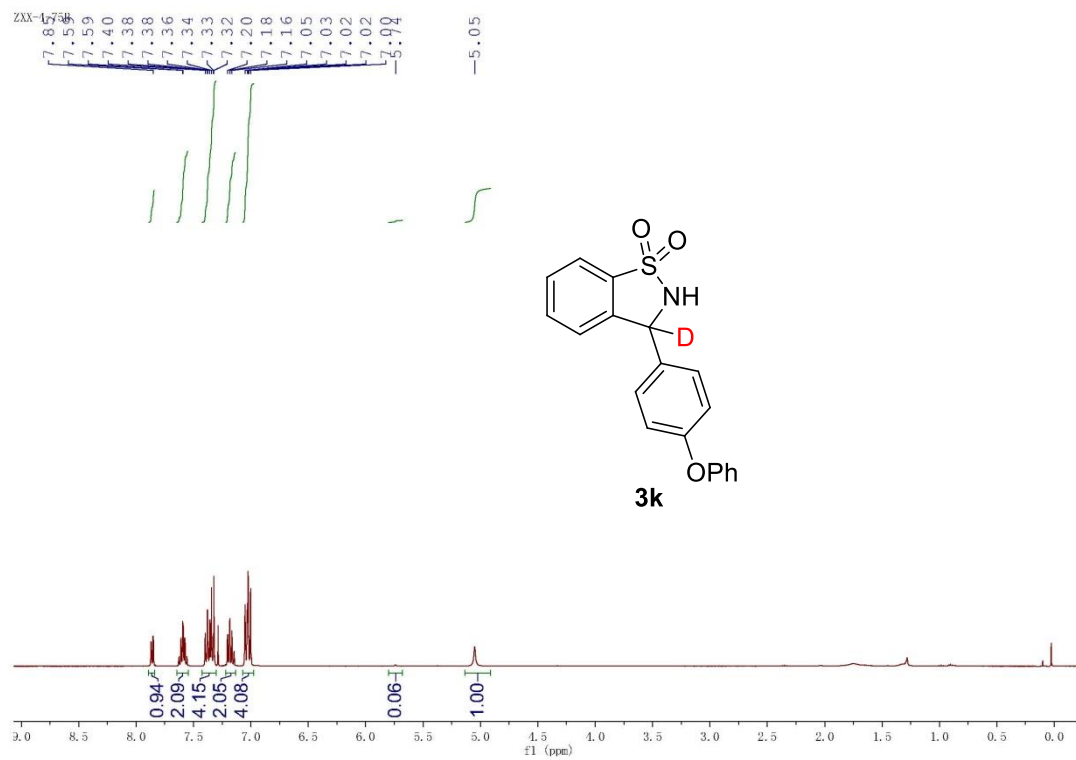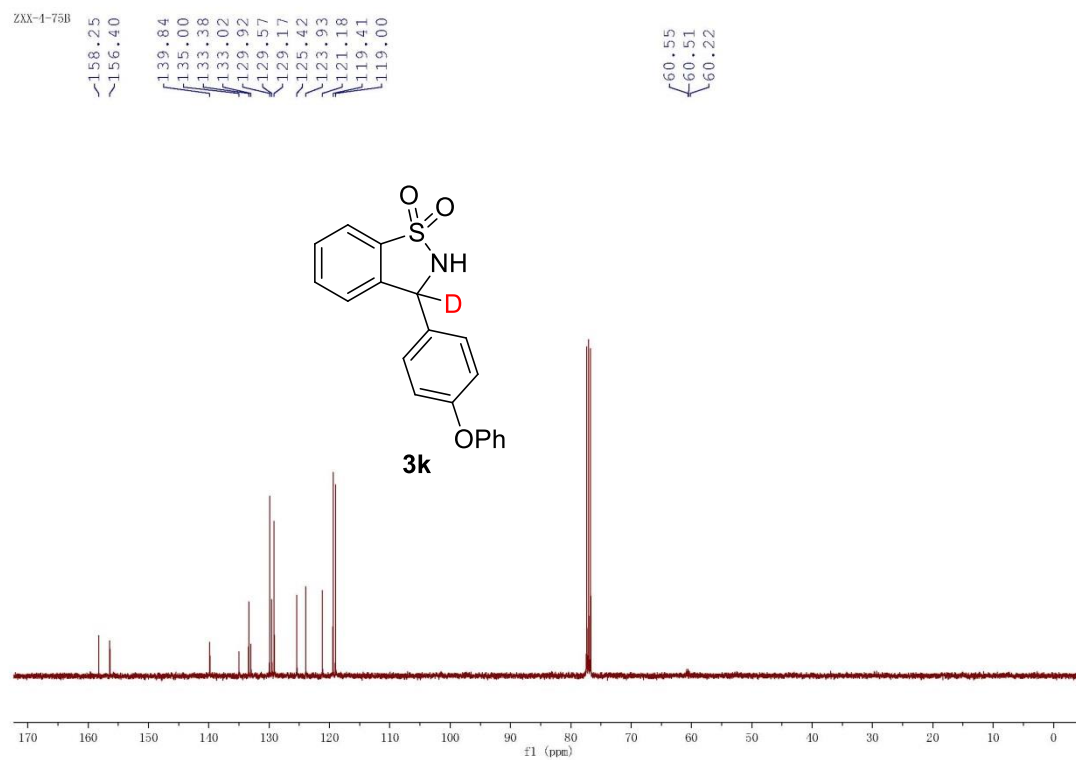

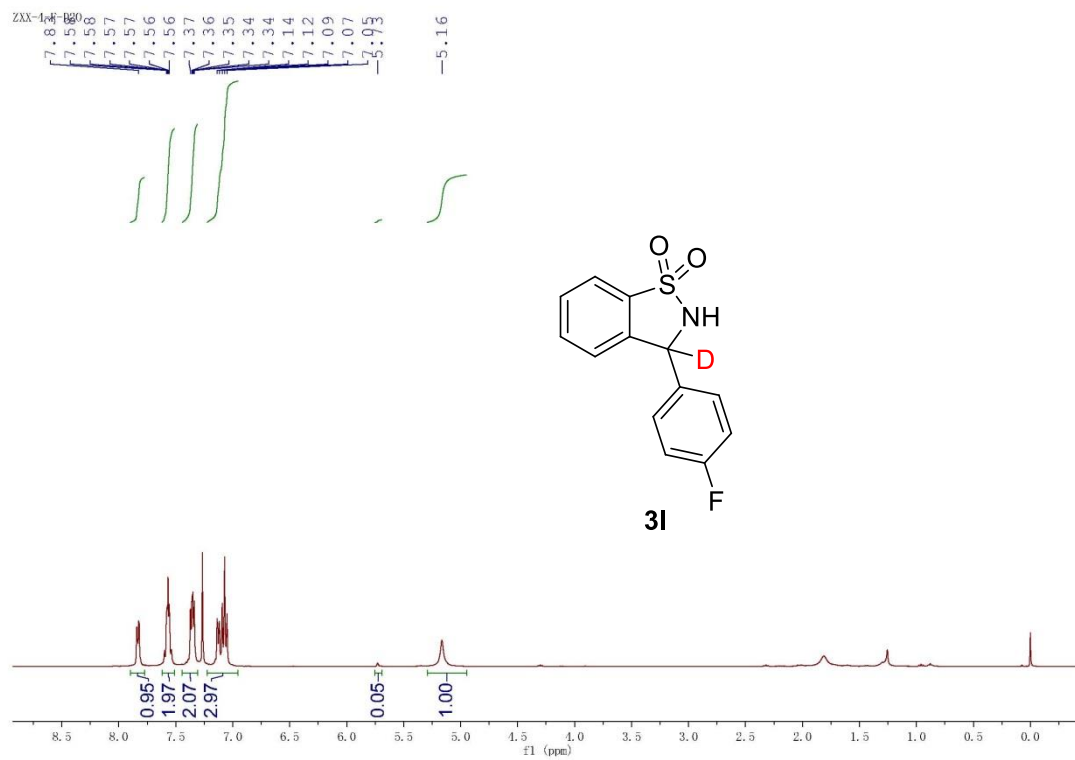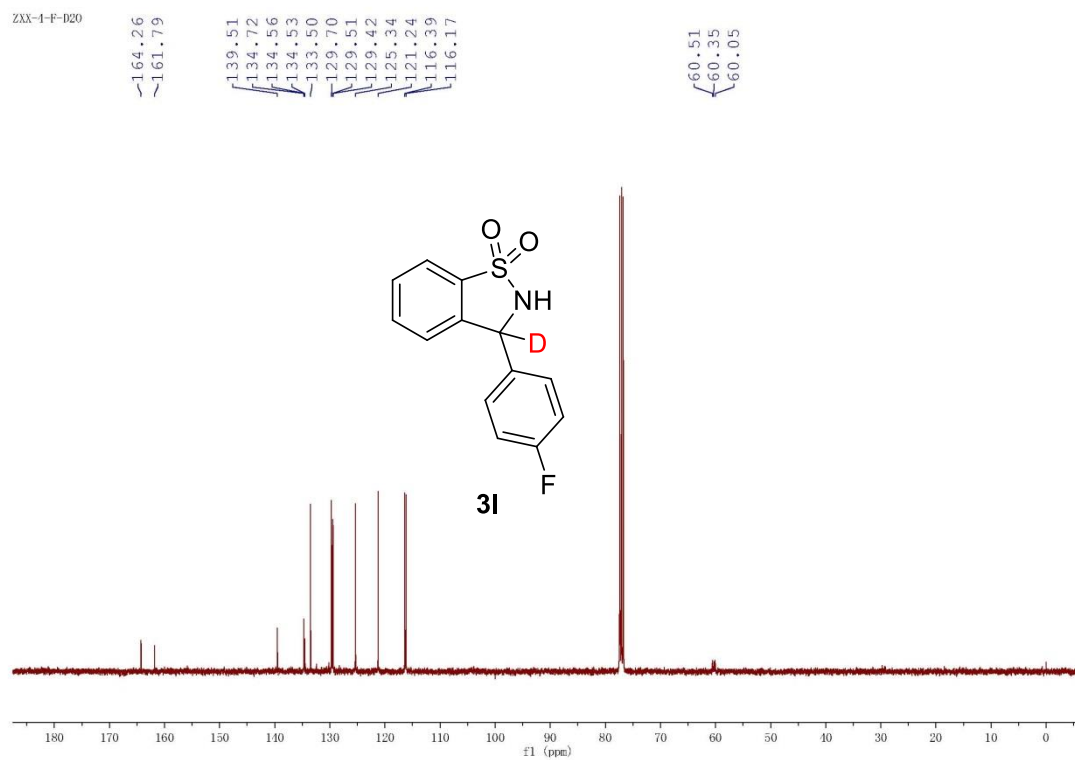

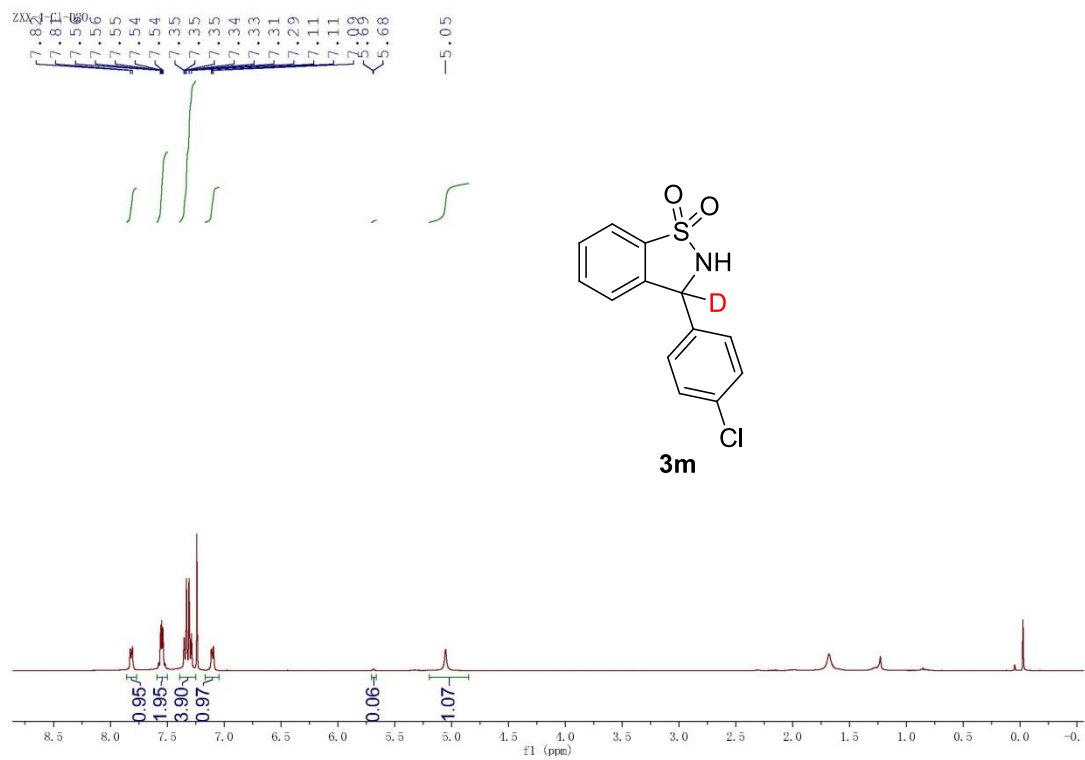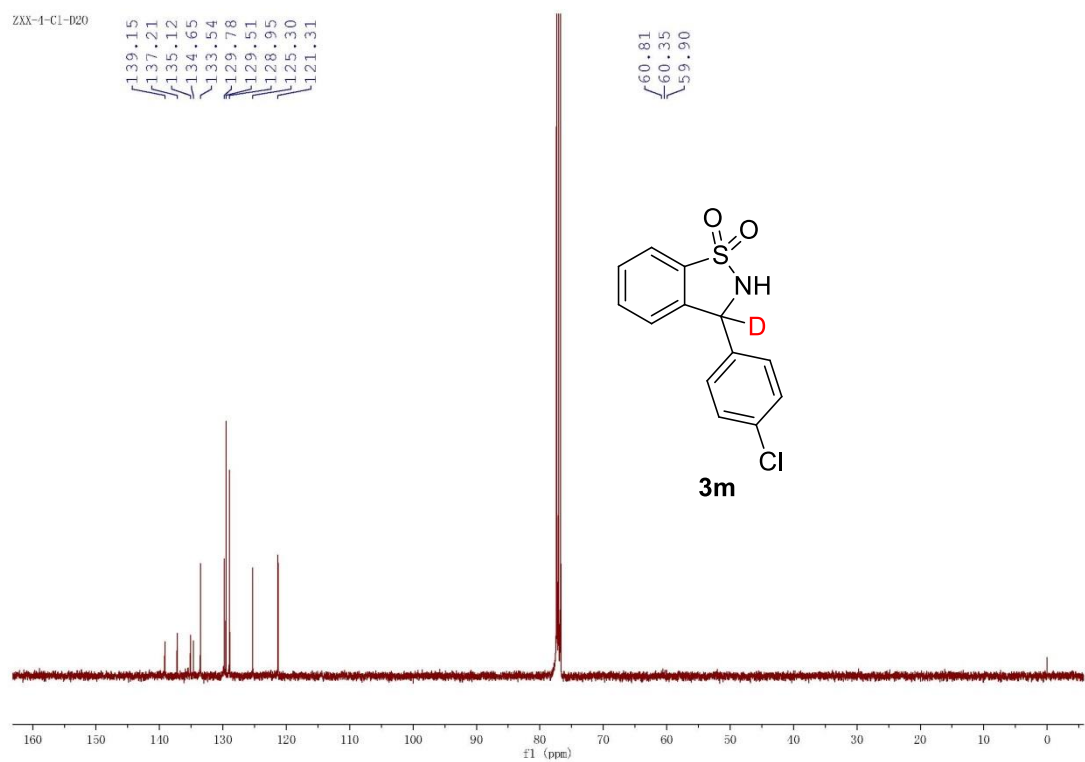

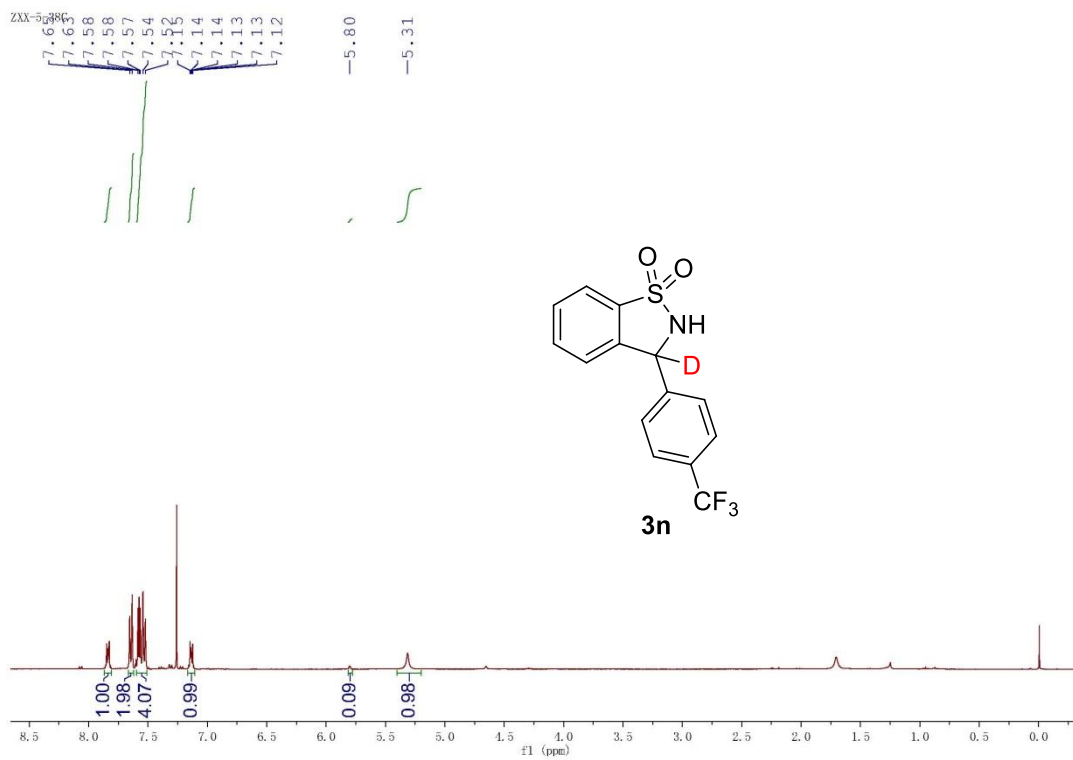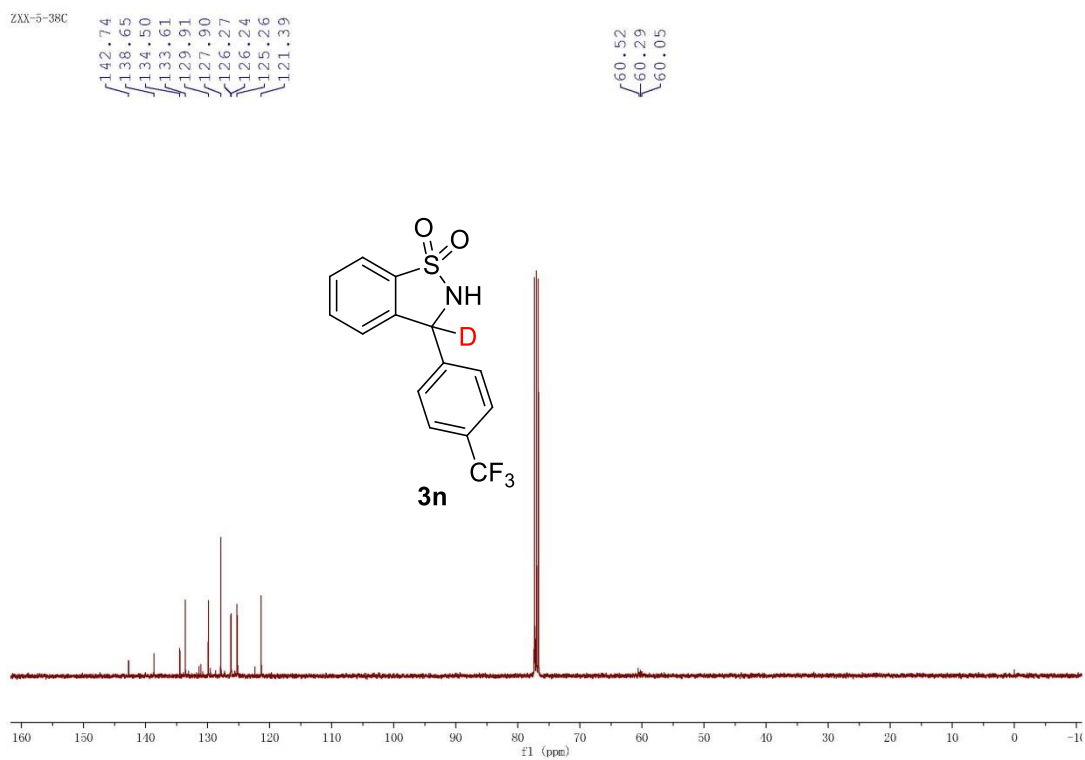



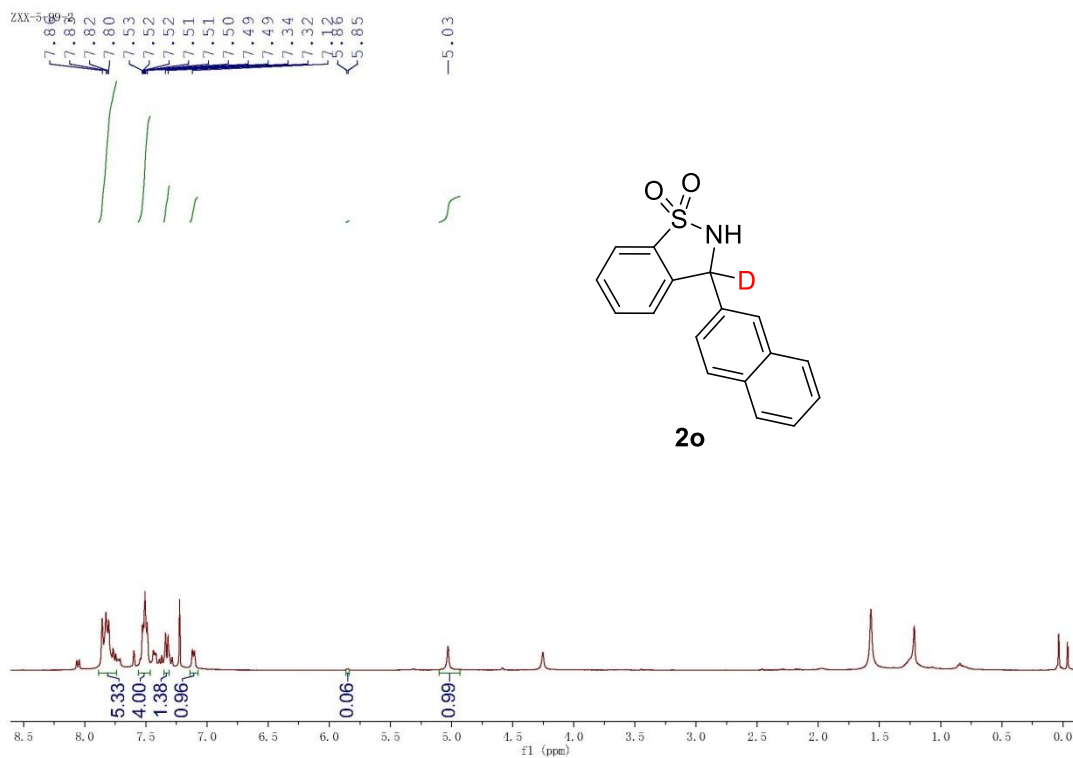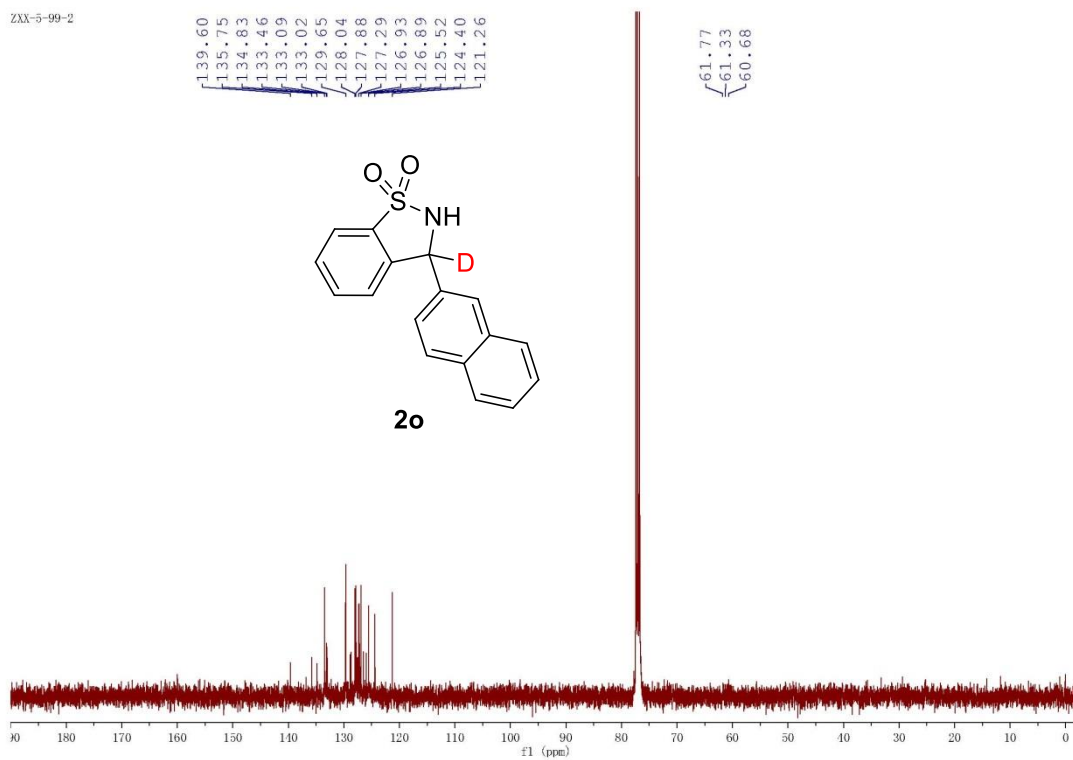

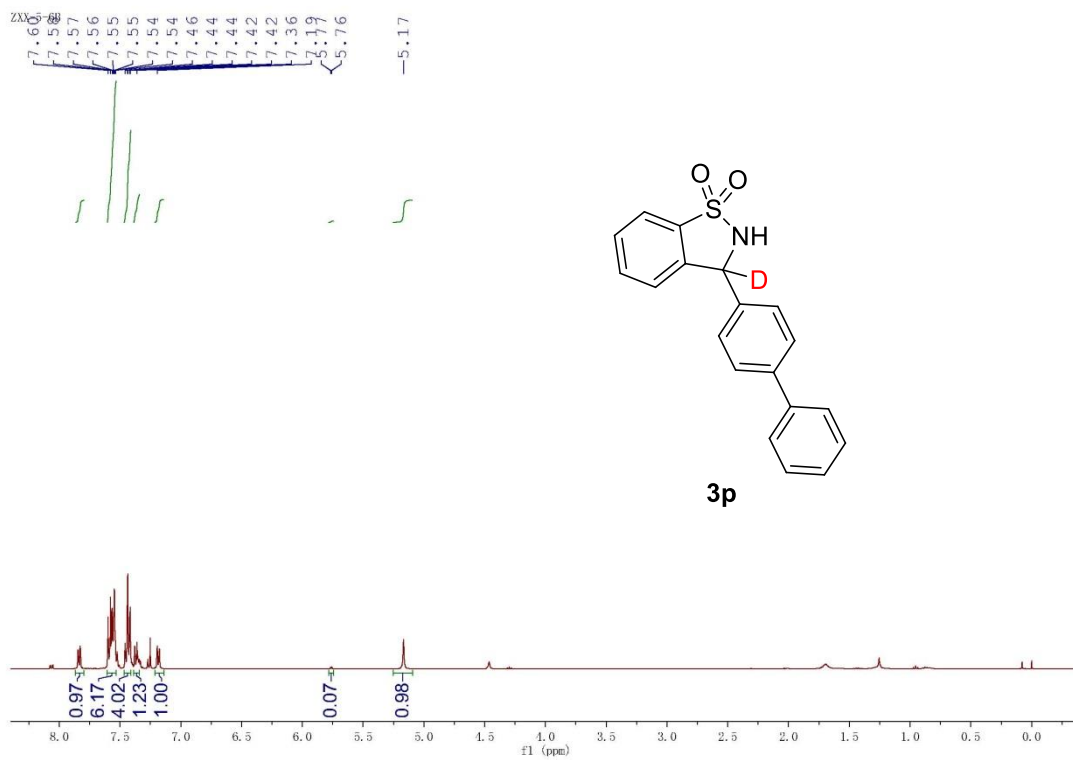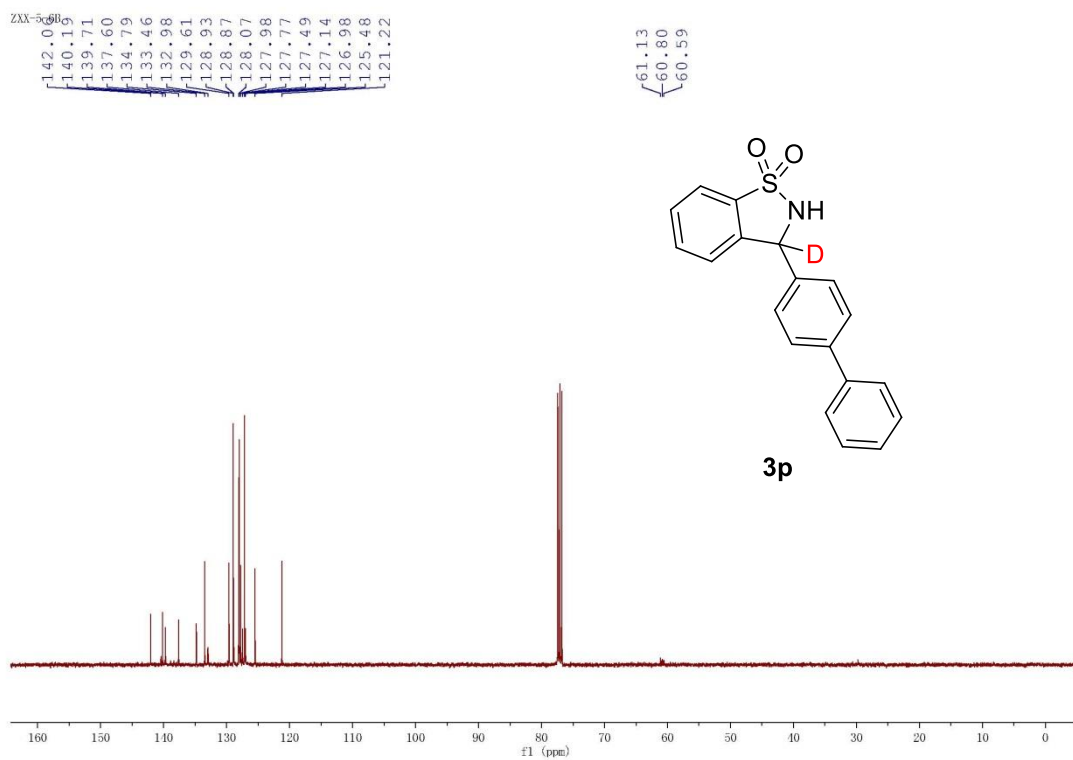

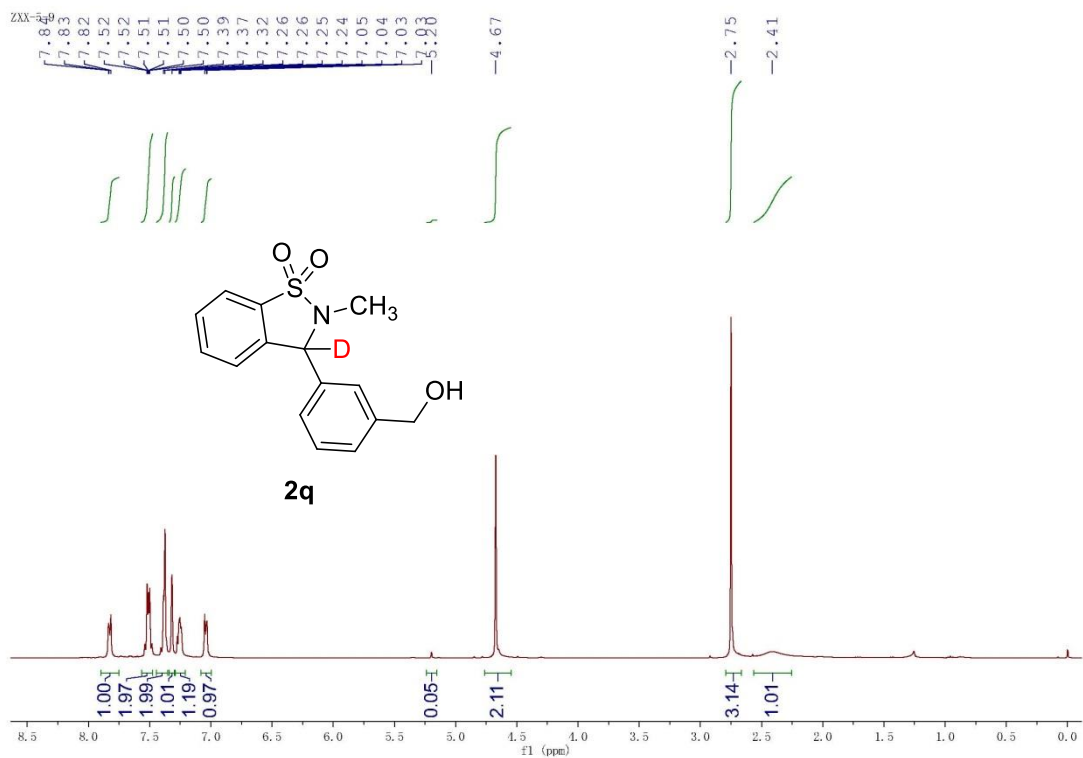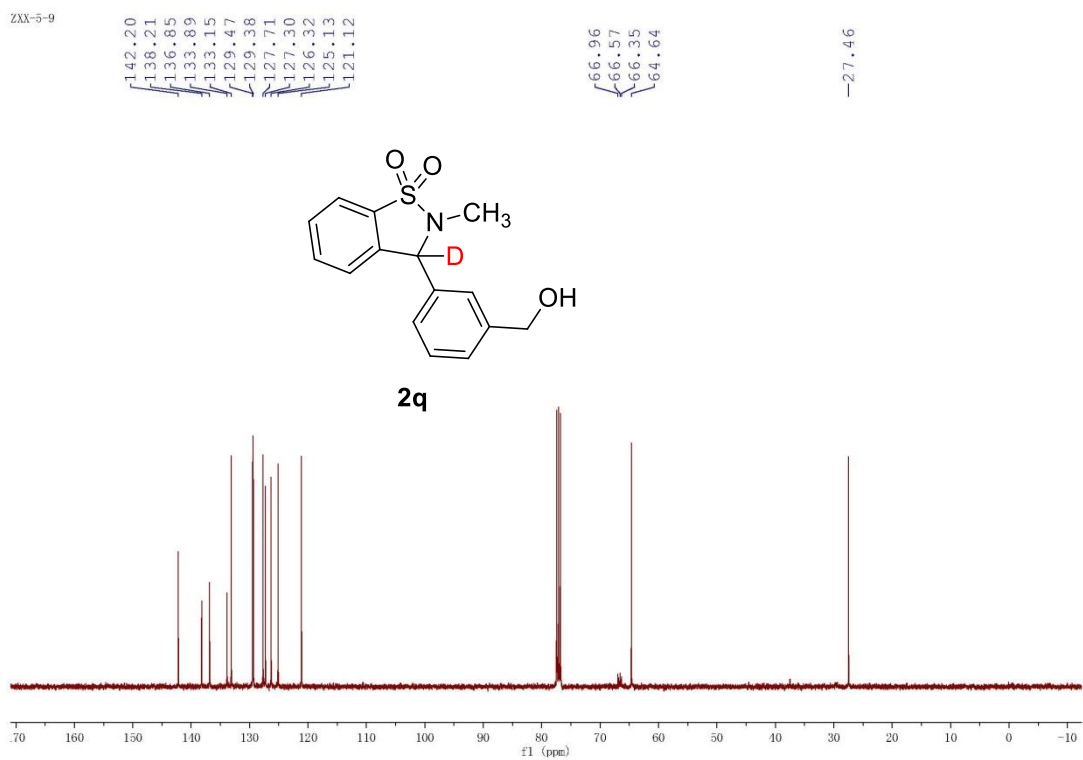

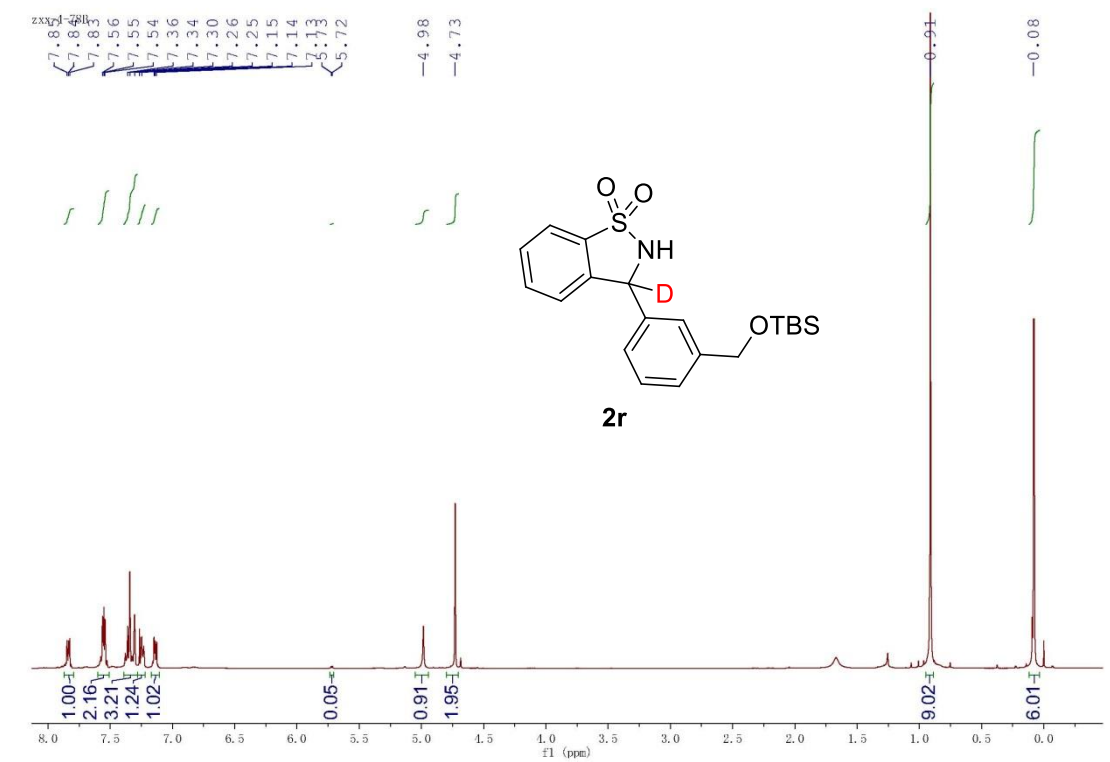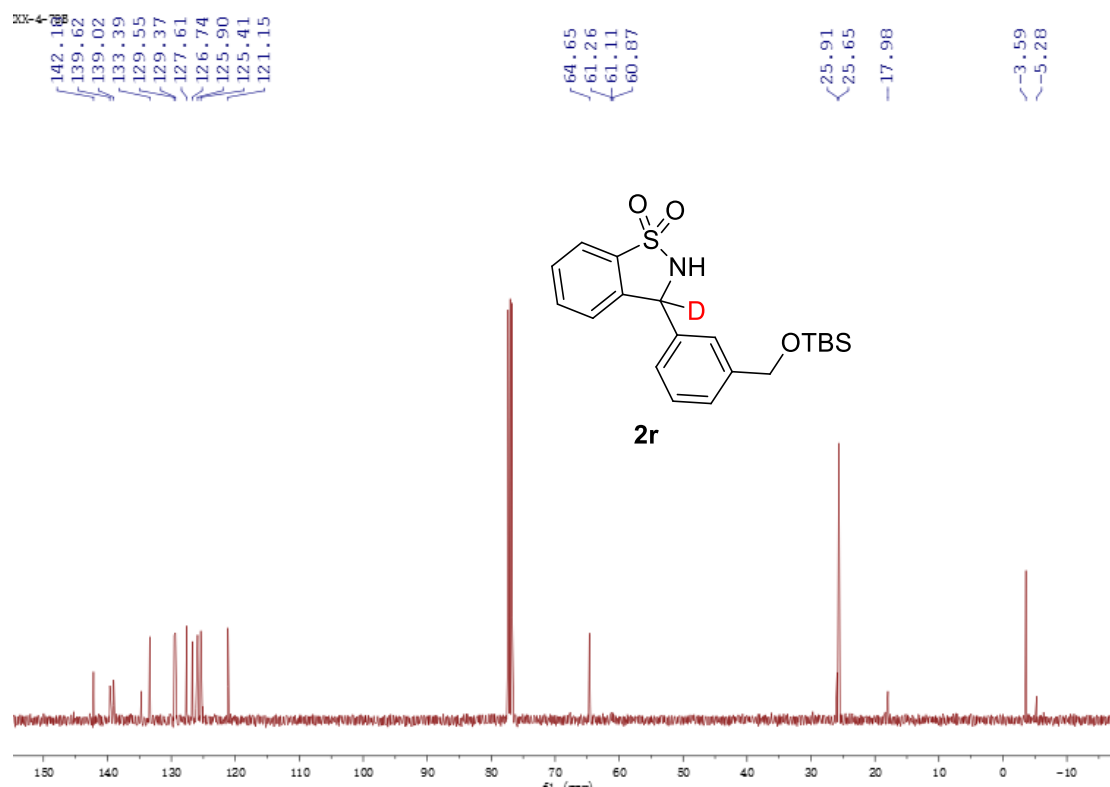

**$^1\text{H-NMR}$  of the reaction mixtures that using  $\text{THF-}d_8$  as solvent instead of THF after 24 hours**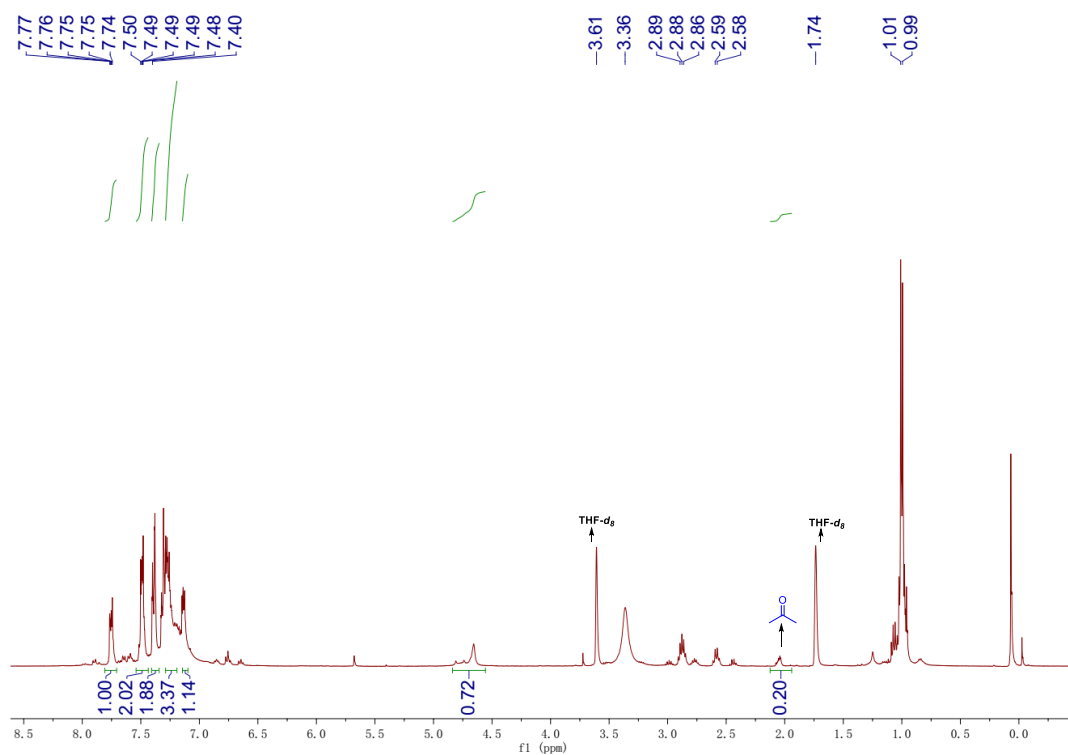 **$^1\text{H-NMR}$  of the products that using the mixture of  $\text{H}_2\text{O}$  and  $\text{D}_2\text{O}$  as reductant after 2 hours**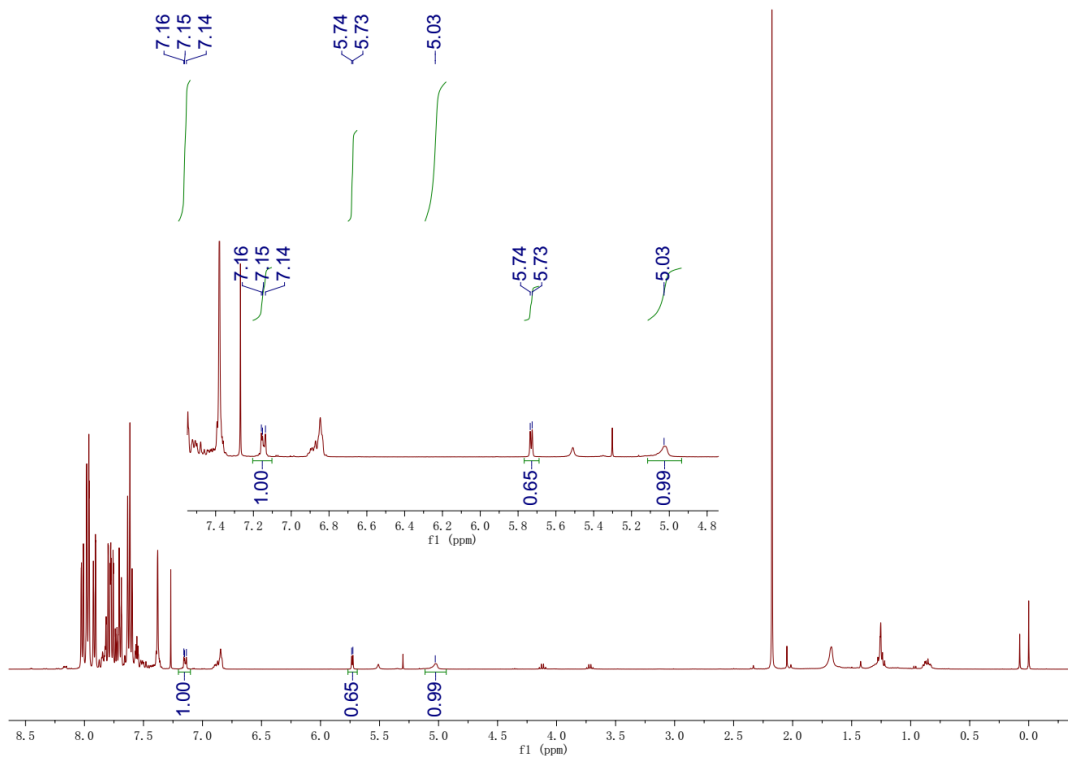

Supplement: c9qo00231f1.pdf [file c9qo00231f1.pdf]
